# Supplementary material for: Science responses to IUCN Red Listing
Source: PeerJ. 2017 Nov 14;5:e4025. doi: 10.7717/peerj.4025 (PMC5691787; doi:10.7717/peerj.4025)
Supplement: Table S1 [file peerj-05-4025-s001.xlsx]

## Sheet: Dataset
IUCN category	Group	Classification year	Reclassification year	Species name	Total papers	1996	1997	1998	1999	2000	2001	2002	2003	2004	2005	2006	2007	2008	2009	2010	2011	2012	2013	2014
DD	Arthropods	2009		Acanthagrion peruanum	0	0	0	0	0	0	0	0	0	0	0	0	0	0	0	0	0	0	0	0
DD	Arthropods	2009		Acanthallagma luteum	0	0	0	0	0	0	0	0	0	0	0	0	0	0	0	0	0	0	0	0
DD	Arthropods	2009		Acanthallagma strohmi	0	0	0	0	0	0	0	0	0	0	0	0	0	0	0	0	0	0	0	0
DD	Arthropods	2008		Acanthopotamon fungosum	0	0	0	0	0	0	0	0	0	0	0	0	0	0	0	0	0	0	0	0
DD	Arthropods	2008		Acanthopotamon panningi	0	0	0	0	0	0	0	0	0	0	0	0	0	0	0	0	0	0	0	0
DD	Arthropods	2008		Acartiapotamon inflatum	0	0	0	0	0	0	0	0	0	0	0	0	0	0	0	0	0	0	0	0
DD	Arthropods	2010		Aciagrion balachowskyi	0	0	0	0	0	0	0	0	0	0	0	0	0	0	0	0	0	0	0	0
DD	Arthropods	2010		Aciagrion brosseti	0	0	0	0	0	0	0	0	0	0	0	0	0	0	0	0	0	0	0	0
DD	Arthropods	2007		Aciagrion macrootithenae	0	0	0	0	0	0	0	0	0	0	0	0	0	0	0	0	0	0	0	0
DD	Arthropods	2010		Aciagrion nodosum	0	0	0	0	0	0	0	0	0	0	0	0	0	0	0	0	0	0	0	0
DD	Arthropods	2010		Aciagrion zambiense	0	0	0	0	0	0	0	0	0	0	0	0	0	0	0	0	0	0	0	0
DD	Arthropods	2008		Adeleana sumatrensis	0	0	0	0	0	0	0	0	0	0	0	0	0	0	0	0	0	0	0	0
DD	Arthropods	2009		Aeolagrion axine	0	0	0	0	0	0	0	0	0	0	0	0	0	0	0	0	0	0	0	0
DD	Arthropods	2009		Aeschnosoma rustica	1	0	0	0	0	0	0	0	0	0	1	0	0	0	0	0	0	0	0	0
DD	Arthropods	2006		Aeshna williamsoniana	1	0	0	0	0	0	0	0	0	0	0	0	1	0	0	0	0	0	0	0
DD	Arthropods	2010		Aethiothemis gamblesi	0	0	0	0	0	0	0	0	0	0	0	0	0	0	0	0	0	0	0	0
DD	Arthropods	2009		Aethiothemis mediofasciata	0	0	0	0	0	0	0	0	0	0	0	0	0	0	0	0	0	0	0	0
DD	Arthropods	2008		Afrithelphusa afzelii	0	0	0	0	0	0	0	0	0	0	0	0	0	0	0	0	0	0	0	0
DD	Arthropods	2008		Afrithelphusa gerhildae	1	1	0	0	0	0	0	0	0	0	0	0	0	0	0	0	0	0	0	0
DD	Arthropods	2008		Afrithelphusa leonensis	0	0	0	0	0	0	0	0	0	0	0	0	0	0	0	0	0	0	0	0
DD	Arthropods	2009		Agriocnemis aderces	0	0	0	0	0	0	0	0	0	0	0	0	0	0	0	0	0	0	0	0
DD	Arthropods	2010		Agriocnemis corbeti	0	0	0	0	0	0	0	0	0	0	0	0	0	0	0	0	0	0	0	0
DD	Arthropods	2009		Agriocnemis dobsoni	0	0	0	0	0	0	0	0	0	0	0	0	0	0	0	0	0	0	0	0
DD	Arthropods	2010		Agrionoptera dorothea	0	0	0	0	0	0	0	0	0	0	0	0	0	0	0	0	0	0	0	0
DD	Arthropods	2009		Agyrtacantha othello	0	0	0	0	0	0	0	0	0	0	0	0	0	0	0	0	0	0	0	0
DD	Arthropods	2008		Alcomon superciliosum	1	0	0	0	0	0	0	0	0	0	0	0	0	0	0	0	0	1	0	0
DD	Arthropods	2010		Alestrus dolosus	0	0	0	0	0	0	0	0	0	0	0	0	0	0	0	0	0	0	0	0
DD	Arthropods	2010		Allocnemis eisentrauti	0	0	0	0	0	0	0	0	0	0	0	0	0	0	0	0	0	0	0	0
DD	Arthropods	2009		Allocnemis interrupta	0	0	0	0	0	0	0	0	0	0	0	0	0	0	0	0	0	0	0	0
DD	Arthropods	2009		Allopodagrion erinys	0	0	0	0	0	0	0	0	0	0	0	0	0	0	0	0	0	0	0	0
DD	Arthropods	2008		Allopotamon tambelanense	0	0	0	0	0	0	0	0	0	0	0	0	0	0	0	0	0	0	0	0
DD	Arthropods	2010		Ampedus balcanicus	0	0	0	0	0	0	0	0	0	0	0	0	0	0	0	0	0	0	0	0
DD	Arthropods	2010		Ampedus bouweri	0	0	0	0	0	0	0	0	0	0	0	0	0	0	0	0	0	0	0	0
DD	Arthropods	2010		Ampedus francolinus	0	0	0	0	0	0	0	0	0	0	0	0	0	0	0	0	0	0	0	0
DD	Arthropods	2010		Ampedus gallicus	0	0	0	0	0	0	0	0	0	0	0	0	0	0	0	0	0	0	0	0
DD	Arthropods	2010		Ampedus impressicollis	0	0	0	0	0	0	0	0	0	0	0	0	0	0	0	0	0	0	0	0
DD	Arthropods	2010		Ampedus karpathicus	0	0	0	0	0	0	0	0	0	0	0	0	0	0	0	0	0	0	0	0
DD	Arthropods	2010		Ampedus koschwitzi	0	0	0	0	0	0	0	0	0	0	0	0	0	0	0	0	0	0	0	0
DD	Arthropods	2010		Ampedus magistrettii	0	0	0	0	0	0	0	0	0	0	0	0	0	0	0	0	0	0	0	0
DD	Arthropods	2010		Ampedus melanurus	0	0	0	0	0	0	0	0	0	0	0	0	0	0	0	0	0	0	0	0
DD	Arthropods	2010		Ampedus pooti	0	0	0	0	0	0	0	0	0	0	0	0	0	0	0	0	0	0	0	0
DD	Arthropods	2010		Ampedus pyrenaeus	0	0	0	0	0	0	0	0	0	0	0	0	0	0	0	0	0	0	0	0
DD	Arthropods	2010		Ampedus rugosus	0	0	0	0	0	0	0	0	0	0	0	0	0	0	0	0	0	0	0	0
DD	Arthropods	2010		Ampedus vandalitiae	0	0	0	0	0	0	0	0	0	0	0	0	0	0	0	0	0	0	0	0
DD	Arthropods	2010		Ampedus ziegleri	0	0	0	0	0	0	0	0	0	0	0	0	0	0	0	0	0	0	0	0
DD	Arthropods	2009		Amphicnemis bicolor	0	0	0	0	0	0	0	0	0	0	0	0	0	0	0	0	0	0	0	0
DD	Arthropods	2009		Amphicnemis glauca	0	0	0	0	0	0	0	0	0	0	0	0	0	0	0	0	0	0	0	0
DD	Arthropods	2009		Amphicnemis pandanicola	0	0	0	0	0	0	0	0	0	0	0	0	0	0	0	0	0	0	0	0
DD	Arthropods	2009		Amphicnemis platystyla	0	0	0	0	0	0	0	0	0	0	0	0	0	0	0	0	0	0	0	0
DD	Arthropods	2006		Amphipteryx agrioides	3	0	0	0	0	0	0	0	0	0	0	0	0	0	1	1	0	0	0	1
DD	Arthropods	2006		Amphipteryx longicaudata	0	0	0	0	0	0	0	0	0	0	0	0	0	0	0	0	0	0	0	0
DD	Arthropods	2009		Amphithemis curvistyla	0	0	0	0	0	0	0	0	0	0	0	0	0	0	0	0	0	0	0	0
DD	Arthropods	2010		Amphithemis vacillans	0	0	0	0	0	0	0	0	0	0	0	0	0	0	0	0	0	0	0	0
DD	Arthropods	2009		Anaciaeschna melanostoma	0	0	0	0	0	0	0	0	0	0	0	0	0	0	0	0	0	0	0	0
DD	Arthropods	2010		Ancyrona japonica	0	0	0	0	0	0	0	0	0	0	0	0	0	0	0	0	0	0	0	0
DD	Arthropods	2009		Andaeschna timotocuica	0	0	0	0	0	0	0	0	0	0	0	0	0	0	0	0	0	0	0	0
DD	Arthropods	2010		Anisogomphus caudalis	0	0	0	0	0	0	0	0	0	0	0	0	0	0	0	0	0	0	0	0
DD	Arthropods	2009		Anisogomphus fujianensis	0	0	0	0	0	0	0	0	0	0	0	0	0	0	0	0	0	0	0	0
DD	Arthropods	2010		Anisogomphus orites	0	0	0	0	0	0	0	0	0	0	0	0	0	0	0	0	0	0	0	0
DD	Arthropods	2009		Anisogomphus vulvalis	0	0	0	0	0	0	0	0	0	0	0	0	0	0	0	0	0	0	0	0
DD	Arthropods	2009		Anisopleura lieftincki	0	0	0	0	0	0	0	0	0	0	0	0	0	0	0	0	0	0	0	0
DD	Arthropods	2010		Anisopleura vallei	0	0	0	0	0	0	0	0	0	0	0	0	0	0	0	0	0	0	0	0
DD	Arthropods	2009		Anotogaster basalis	0	0	0	0	0	0	0	0	0	0	0	0	0	0	0	0	0	0	0	0
DD	Arthropods	2010		Anotogaster gigantica	0	0	0	0	0	0	0	0	0	0	0	0	0	0	0	0	0	0	0	0
DD	Arthropods	2009		Anotogaster sakaii	0	0	0	0	0	0	0	0	0	0	0	0	0	0	0	0	0	0	0	0
DD	Arthropods	2008		Aparapotamon arcuatum	0	0	0	0	0	0	0	0	0	0	0	0	0	0	0	0	0	0	0	0
DD	Arthropods	2008		Aparapotamon emineoforaminum	0	0	0	0	0	0	0	0	0	0	0	0	0	0	0	0	0	0	0	0
DD	Arthropods	2008		Aparapotamon gracillipedum	0	0	0	0	0	0	0	0	0	0	0	0	0	0	0	0	0	0	0	0
DD	Arthropods	2008		Aparapotamon huiliense	0	0	0	0	0	0	0	0	0	0	0	0	0	0	0	0	0	0	0	0
DD	Arthropods	2008		Aparapotamon inflomanum	0	0	0	0	0	0	0	0	0	0	0	0	0	0	0	0	0	0	0	0
DD	Arthropods	2008		Aparapotamon molarum	0	0	0	0	0	0	0	0	0	0	0	0	0	0	0	0	0	0	0	0
DD	Arthropods	2008		Aparapotamon muliense	0	0	0	0	0	0	0	0	0	0	0	0	0	0	0	0	0	0	0	0
DD	Arthropods	2008		Aparapotamon protinum	0	0	0	0	0	0	0	0	0	0	0	0	0	0	0	0	0	0	0	0
DD	Arthropods	2008		Aparapotamon similium	0	0	0	0	0	0	0	0	0	0	0	0	0	0	0	0	0	0	0	0
DD	Arthropods	2008		Aparapotamon tholosum	0	0	0	0	0	0	0	0	0	0	0	0	0	0	0	0	0	0	0	0
DD	Arthropods	2009		Aphylla barbata	0	0	0	0	0	0	0	0	0	0	0	0	0	0	0	0	0	0	0	0
DD	Arthropods	2009		Aphylla robusta	0	0	0	0	0	0	0	0	0	0	0	0	0	0	0	0	0	0	0	0
DD	Arthropods	2009		Aphylla spinula	0	0	0	0	0	0	0	0	0	0	0	0	0	0	0	0	0	0	0	0
DD	Arthropods	2008		Apotamonautes hainanensis	0	0	0	0	0	0	0	0	0	0	0	0	0	0	0	0	0	0	0	0
DD	Arthropods	2009		Archaeopodagrion bilobatum	0	0	0	0	0	0	0	0	0	0	0	0	0	0	0	0	0	0	0	0
DD	Arthropods	2009		Argia bicellulata	0	0	0	0	0	0	0	0	0	0	0	0	0	0	0	0	0	0	0	0
DD	Arthropods	2009		Argia limitata	0	0	0	0	0	0	0	0	0	0	0	0	0	0	0	0	0	0	0	0
DD	Arthropods	2009		Argia percellulata	1	0	0	0	0	0	0	0	0	0	0	0	0	0	0	0	0	1	0	0
DD	Arthropods	2007		Argia pima	1	0	0	0	1	0	0	0	0	0	0	0	0	0	0	0	0	0	0	0
DD	Arthropods	2009		Argia subapicalis	0	0	0	0	0	0	0	0	0	0	0	0	0	0	0	0	0	0	0	0
DD	Arthropods	2009		Argia variata	0	0	0	0	0	0	0	0	0	0	0	0	0	0	0	0	0	0	0	0
DD	Arthropods	2006		Argiocnemis solitaria	0	0	0	0	0	0	0	0	0	0	0	0	0	0	0	0	0	0	0	0
DD	Arthropods	2009		Argiolestes alfurus	0	0	0	0	0	0	0	0	0	0	0	0	0	0	0	0	0	0	0	0
DD	Arthropods	2009		Argiolestes connectens	0	0	0	0	0	0	0	0	0	0	0	0	0	0	0	0	0	0	0	0
DD	Arthropods	2009		Argiolestes kirbyi	1	0	0	0	0	0	0	0	0	0	0	0	0	0	0	0	0	0	1	0
DD	Arthropods	2009		Argiolestes luteipes	0	0	0	0	0	0	0	0	0	0	0	0	0	0	0	0	0	0	0	0
DD	Arthropods	2009		Argiolestes saltuarius	0	0	0	0	0	0	0	0	0	0	0	0	0	0	0	0	0	0	0	0
DD	Arthropods	2009		Argiolestes simplex	0	0	0	0	0	0	0	0	0	0	0	0	0	0	0	0	0	0	0	0
DD	Arthropods	2009		Argiolestes tenuispinus	0	0	0	0	0	0	0	0	0	0	0	0	0	0	0	0	0	0	0	0
DD	Arthropods	2009		Argiolestes tristis	0	0	0	0	0	0	0	0	0	0	0	0	0	0	0	0	0	0	0	0
DD	Arthropods	2009		Arrhenocnemis amphidactylis	0	0	0	0	0	0	0	0	0	0	0	0	0	0	0	0	0	0	0	0
DD	Arthropods	2008		Artopotamon compressum	0	0	0	0	0	0	0	0	0	0	0	0	0	0	0	0	0	0	0	0
DD	Arthropods	2009		Asiagomphus melanopsoides	0	0	0	0	0	0	0	0	0	0	0	0	0	0	0	0	0	0	0	0
DD	Arthropods	2010		Asiagomphus odoneli	0	0	0	0	0	0	0	0	0	0	0	0	0	0	0	0	0	0	0	0
DD	Arthropods	2009		Asiagomphus pacatus	0	0	0	0	0	0	0	0	0	0	0	0	0	0	0	0	0	0	0	0
DD	Arthropods	2008		Aspermon feae	0	0	0	0	0	0	0	0	0	0	0	0	0	0	0	0	0	0	0	0
DD	Arthropods	2010		Astacoides crosnieri	1	0	0	0	0	0	0	0	0	0	0	0	1	0	0	0	0	0	0	0
DD	Arthropods	2010		Astacoides petiti	0	0	0	0	0	0	0	0	0	0	0	0	0	0	0	0	0	0	0	0
DD	Arthropods	2010		Astacus pachypus	0	0	0	0	0	0	0	0	0	0	0	0	0	0	0	0	0	0	0	0
DD	Arthropods	2010		Athous strictus	0	0	0	0	0	0	0	0	0	0	0	0	0	0	0	0	0	0	0	0
DD	Arthropods	2009		Austroargiolestes brookhousei	0	0	0	0	0	0	0	0	0	0	0	0	0	0	0	0	0	0	0	0
DD	Arthropods	2009		Austrogomphus angeli	0	0	0	0	0	0	0	0	0	0	0	0	0	0	0	0	0	0	0	0
DD	Arthropods	2006		Austrogomphus atratus	0	0	0	0	0	0	0	0	0	0	0	0	0	0	0	0	0	0	0	0
DD	Arthropods	2009		Austrogomphus doddi	0	0	0	0	0	0	0	0	0	0	0	0	0	0	0	0	0	0	0	0
DD	Arthropods	2009		Austrogomphus pusillus	0	0	0	0	0	0	0	0	0	0	0	0	0	0	0	0	0	0	0	0
DD	Arthropods	2010		Austropotamobius torrentium	73	3	2	0	1	1	1	5	1	3	12	6	5	3	5	2	7	5	6	5
DD	Arthropods	2008		Austrothelphusa insularis	0	0	0	0	0	0	0	0	0	0	0	0	0	0	0	0	0	0	0	0
DD	Arthropods	2010		Axinopalpis barbarae	0	0	0	0	0	0	0	0	0	0	0	0	0	0	0	0	0	0	0	0
DD	Arthropods	2008		Badistemon turgidulum	0	0	0	0	0	0	0	0	0	0	0	0	0	0	0	0	0	0	0	0
DD	Arthropods	2008		Bakousa hendersoniana	0	0	0	0	0	0	0	0	0	0	0	0	0	0	0	0	0	0	0	0
DD	Arthropods	2008		Bakousa kenepai	0	0	0	0	0	0	0	0	0	0	0	0	0	0	0	0	0	0	0	0
DD	Arthropods	2008		Balssiathelphusa natunaensis	0	0	0	0	0	0	0	0	0	0	0	0	0	0	0	0	0	0	0	0
DD	Arthropods	2008		Balssiathelphusa sucki	0	0	0	0	0	0	0	0	0	0	0	0	0	0	0	0	0	0	0	0
DD	Arthropods	2008		Balssipotamon fruhstorferi	0	0	0	0	0	0	0	0	0	0	0	0	0	0	0	0	0	0	0	0
DD	Arthropods	2009		Bayadera kali	0	0	0	0	0	0	0	0	0	0	0	0	0	0	0	0	0	0	0	0
DD	Arthropods	2010		Bayadera longicauda	0	0	0	0	0	0	0	0	0	0	0	0	0	0	0	0	0	0	0	0
DD	Arthropods	2008		Beccumon alcockianum	0	0	0	0	0	0	0	0	0	0	0	0	0	0	0	0	0	0	0	0
DD	Arthropods	2008		Beccumon jarujini	0	0	0	0	0	0	0	0	0	0	0	0	0	0	0	0	0	0	0	0
DD	Arthropods	2008		Beccumon maesariang	0	0	0	0	0	0	0	0	0	0	0	0	0	0	0	0	0	0	0	0
DD	Arthropods	2008		Beccumon namlang	0	0	0	0	0	0	0	0	0	0	0	0	0	0	0	0	0	0	0	0
DD	Arthropods	2009		Bornargiolestes nigra	0	0	0	0	0	0	0	0	0	0	0	0	0	0	0	0	0	0	0	0
DD	Arthropods	2008		Bottapotamon engelhardti	0	0	0	0	0	0	0	0	0	0	0	0	0	0	0	0	0	0	0	0
DD	Arthropods	2008		Bottapotamon yonganense	0	0	0	0	0	0	0	0	0	0	0	0	0	0	0	0	0	0	0	0
DD	Arthropods	2010		Bouchardina robisoni	1	0	0	0	0	0	0	0	0	0	0	0	0	0	0	1	0	0	0	0
DD	Arthropods	2009		Boyeria sinensis	0	0	0	0	0	0	0	0	0	0	0	0	0	0	0	0	0	0	0	0
DD	Arthropods	2009		Brachygonia ophelia	0	0	0	0	0	0	0	0	0	0	0	0	0	0	0	0	0	0	0	0
DD	Arthropods	2008		Brasiliothelphusa tapajoense	0	0	0	0	0	0	0	0	0	0	0	0	0	0	0	0	0	0	0	0
DD	Arthropods	2009		Brechmorhoga grenadensis	0	0	0	0	0	0	0	0	0	0	0	0	0	0	0	0	0	0	0	0
DD	Arthropods	2009		Burmagomphus arboreus	0	0	0	0	0	0	0	0	0	0	0	0	0	0	0	0	0	0	0	0
DD	Arthropods	2009		Burmagomphus arthuri	0	0	0	0	0	0	0	0	0	0	0	0	0	0	0	0	0	0	0	0
DD	Arthropods	2010		Burmagomphus hasimaricus	0	0	0	0	0	0	0	0	0	0	0	0	0	0	0	0	0	0	0	0
DD	Arthropods	2010		Burmagomphus v-flavum	0	0	0	0	0	0	0	0	0	0	0	0	0	0	0	0	0	0	0	0
DD	Arthropods	2009		Burmargiolestes laidlawi	0	0	0	0	0	0	0	0	0	0	0	0	0	0	0	0	0	0	0	0
DD	Arthropods	2009		Caconeura ramburi	0	0	0	0	0	0	0	0	0	0	0	0	0	0	0	0	0	0	0	0
DD	Arthropods	2009		Caconeura risi	0	0	0	0	0	0	0	0	0	0	0	0	0	0	0	0	0	0	0	0
DD	Arthropods	2009		Caledargiolestes janiceae	0	0	0	0	0	0	0	0	0	0	0	0	0	0	0	0	0	0	0	0
DD	Arthropods	2009		Calicnemia mukherjeei	0	0	0	0	0	0	0	0	0	0	0	0	0	0	0	0	0	0	0	0
DD	Arthropods	2010		Calicnemia sudhaae	0	0	0	0	0	0	0	0	0	0	0	0	0	0	0	0	0	0	0	0
DD	Arthropods	2009		Caliphaea thailandica	0	0	0	0	0	0	0	0	0	0	0	0	0	0	0	0	0	0	0	0
DD	Arthropods	2009		Calocypha laidlawi	0	0	0	0	0	0	0	0	0	0	0	0	0	0	0	0	0	0	0	0
DD	Arthropods	2009		Calophlebia interposita	0	0	0	0	0	0	0	0	0	0	0	0	0	0	0	0	0	0	0	0
DD	Arthropods	2009		Calophlebia karschi	0	0	0	0	0	0	0	0	0	0	0	0	0	0	0	0	0	0	0	0
DD	Arthropods	2010		Cambarellus blacki	0	0	0	0	0	0	0	0	0	0	0	0	0	0	0	0	0	0	0	0
DD	Arthropods	2010		Cambarellus diminutus	1	1	0	0	0	0	0	0	0	0	0	0	0	0	0	0	0	0	0	0
DD	Arthropods	2010		Cambarellus schmitti	0	0	0	0	0	0	0	0	0	0	0	0	0	0	0	0	0	0	0	0
DD	Arthropods	2010		Cambaroides dauricus	1	0	0	0	0	0	0	0	0	0	0	0	0	1	0	0	0	0	0	0
DD	Arthropods	2010		Cambaroides japonicus	20	0	2	0	0	1	3	3	2	3	0	3	1	1	0	0	0	1	0	0
DD	Arthropods	2010		Cambaroides schrenckii	2	0	0	0	0	0	0	0	0	0	0	0	0	1	0	0	0	0	1	0
DD	Arthropods	2010		Cambaroides similis	5	0	0	0	0	0	1	0	0	0	1	0	0	0	0	1	1	1	0	0
DD	Arthropods	2010		Cambarus brachydactylus	0	0	0	0	0	0	0	0	0	0	0	0	0	0	0	0	0	0	0	0
DD	Arthropods	2010		Cambarus catagius	0	0	0	0	0	0	0	0	0	0	0	0	0	0	0	0	0	0	0	0
DD	Arthropods	2010		Cambarus conasaugaensis	0	0	0	0	0	0	0	0	0	0	0	0	0	0	0	0	0	0	0	0
DD	Arthropods	2010		Cambarus extraneus	0	0	0	0	0	0	0	0	0	0	0	0	0	0	0	0	0	0	0	0
DD	Arthropods	2010		Cambarus fasciatus	0	0	0	0	0	0	0	0	0	0	0	0	0	0	0	0	0	0	0	0
DD	Arthropods	2010		Cambarus hubrichti	0	0	0	0	0	0	0	0	0	0	0	0	0	0	0	0	0	0	0	0
DD	Arthropods	2010		Cambarus parrishi	0	0	0	0	0	0	0	0	0	0	0	0	0	0	0	0	0	0	0	0
DD	Arthropods	2010		Cambarus pristinus	0	0	0	0	0	0	0	0	0	0	0	0	0	0	0	0	0	0	0	0
DD	Arthropods	2010		Cambarus pyronotus	1	0	0	0	0	0	0	0	0	0	0	0	0	0	0	0	0	0	1	0
DD	Arthropods	2010		Cambarus spicatus	0	0	0	0	0	0	0	0	0	0	0	0	0	0	0	0	0	0	0	0
DD	Arthropods	2010		Cambarus strigosus	0	0	0	0	0	0	0	0	0	0	0	0	0	0	0	0	0	0	0	0
DD	Arthropods	2010		Cambarus veteranus	3	0	0	0	0	0	0	0	0	0	0	0	0	0	0	2	0	0	0	1
DD	Arthropods	2008		Camptophallus botti	0	0	0	0	0	0	0	0	0	0	0	0	0	0	0	0	0	0	0	0
DD	Arthropods	2009		Cannaphila mortoni	0	0	0	0	0	0	0	0	0	0	0	0	0	0	0	0	0	0	0	0
DD	Arthropods	2010		Cardiophorus widenfalki	0	0	0	0	0	0	0	0	0	0	0	0	0	0	0	0	0	0	0	0
DD	Arthropods	2009		Celebophlebia dactylogastra	0	0	0	0	0	0	0	0	0	0	0	0	0	0	0	0	0	0	0	0
DD	Arthropods	2010		Cephalaeschna acutifrons	0	0	0	0	0	0	0	0	0	0	0	0	0	0	0	0	0	0	0	0
DD	Arthropods	2009		Cephalaeschna klapperichi	0	0	0	0	0	0	0	0	0	0	0	0	0	0	0	0	0	0	0	0
DD	Arthropods	2009		Cephalaeschna klotsae	1	0	0	0	0	0	0	0	0	0	0	0	0	1	0	0	0	0	0	0
DD	Arthropods	2010		Cephalaeschna masoni	0	0	0	0	0	0	0	0	0	0	0	0	0	0	0	0	0	0	0	0
DD	Arthropods	2009		Cercion luzonicum	0	0	0	0	0	0	0	0	0	0	0	0	0	0	0	0	0	0	0	0
DD	Arthropods	2007		Ceriagrion katamborae	0	0	0	0	0	0	0	0	0	0	0	0	0	0	0	0	0	0	0	0
DD	Arthropods	2009		Ceriagrion madagazureum	0	0	0	0	0	0	0	0	0	0	0	0	0	0	0	0	0	0	0	0
DD	Arthropods	2010		Ceriagrion nigroflavum	0	0	0	0	0	0	0	0	0	0	0	0	0	0	0	0	0	0	0	0
DD	Arthropods	2009		Ceriagrion nigrolineatum	0	0	0	0	0	0	0	0	0	0	0	0	0	0	0	0	0	0	0	0
DD	Arthropods	2009		Ceriagrion oblongulum	0	0	0	0	0	0	0	0	0	0	0	0	0	0	0	0	0	0	0	0
DD	Arthropods	2008		Chaceus cesarensis	0	0	0	0	0	0	0	0	0	0	0	0	0	0	0	0	0	0	0	0
DD	Arthropods	2008		Chaceus davidi	0	0	0	0	0	0	0	0	0	0	0	0	0	0	0	0	0	0	0	0
DD	Arthropods	2008		Chaceus motiloni	0	0	0	0	0	0	0	0	0	0	0	0	0	0	0	0	0	0	0	0
DD	Arthropods	2008		Chaceus nasutus	0	0	0	0	0	0	0	0	0	0	0	0	0	0	0	0	0	0	0	0
DD	Arthropods	2010		Cherax lorentzi	0	0	0	0	0	0	0	0	0	0	0	0	0	0	0	0	0	0	0	0
DD	Arthropods	2010		Cherax monticola	0	0	0	0	0	0	0	0	0	0	0	0	0	0	0	0	0	0	0	0
DD	Arthropods	2010		Cherax urospinosus	0	0	0	0	0	0	0	0	0	0	0	0	0	0	0	0	0	0	0	0
DD	Arthropods	2008		Chinapotamon anlongense	0	0	0	0	0	0	0	0	0	0	0	0	0	0	0	0	0	0	0	0
DD	Arthropods	2008		Chinapotamon glabrum	0	0	0	0	0	0	0	0	0	0	0	0	0	0	0	0	0	0	0	0
DD	Arthropods	2008		Chinapotamon longlingense	0	0	0	0	0	0	0	0	0	0	0	0	0	0	0	0	0	0	0	0
DD	Arthropods	2008		Chinapotamon pusillum	0	0	0	0	0	0	0	0	0	0	0	0	0	0	0	0	0	0	0	0
DD	Arthropods	2008		Chinapotamon xingrenense	0	0	0	0	0	0	0	0	0	0	0	0	0	0	0	0	0	0	0	0
DD	Arthropods	2010		Chlorocypha ghesquierei	0	0	0	0	0	0	0	0	0	0	0	0	0	0	0	0	0	0	0	0
DD	Arthropods	2010		Chlorocypha helenae	0	0	0	0	0	0	0	0	0	0	0	0	0	0	0	0	0	0	0	0
DD	Arthropods	2010		Chlorocypha neptunus	0	0	0	0	0	0	0	0	0	0	0	0	0	0	0	0	0	0	0	0
DD	Arthropods	2007		Chlorocypha rubriventris	0	0	0	0	0	0	0	0	0	0	0	0	0	0	0	0	0	0	0	0
DD	Arthropods	2009		Chlorogomphus fraseri	0	0	0	0	0	0	0	0	0	0	0	0	0	0	0	0	0	0	0	0
DD	Arthropods	2009		Chlorogomphus kitawakii	1	0	0	0	0	0	0	0	0	0	0	0	0	0	0	0	0	0	1	0
DD	Arthropods	2009		Chlorogomphus magnificus	0	0	0	0	0	0	0	0	0	0	0	0	0	0	0	0	0	0	0	0
DD	Arthropods	2010		Chlorogomphus mortoni	0	0	0	0	0	0	0	0	0	0	0	0	0	0	0	0	0	0	0	0
DD	Arthropods	2009		Chlorogomphus preciosus	0	0	0	0	0	0	0	0	0	0	0	0	0	0	0	0	0	0	0	0
DD	Arthropods	2010		Chlorogomphus schmidti	0	0	0	0	0	0	0	0	0	0	0	0	0	0	0	0	0	0	0	0
DD	Arthropods	2010		Chlorogomphus speciosus	0	0	0	0	0	0	0	0	0	0	0	0	0	0	0	0	0	0	0	0
DD	Arthropods	2009		Chloropetalia owadai	0	0	0	0	0	0	0	0	0	0	0	0	0	0	0	0	0	0	0	0
DD	Arthropods	2010		Chlorophorus aegyptiacus	0	0	0	0	0	0	0	0	0	0	0	0	0	0	0	0	0	0	0	0
DD	Arthropods	2010		Clypeorhagus clypeatus	0	0	0	0	0	0	0	0	0	0	0	0	0	0	0	0	0	0	0	0
DD	Arthropods	2008		Coccusa adipis	0	0	0	0	0	0	0	0	0	0	0	0	0	0	0	0	0	0	0	0
DD	Arthropods	2009		Coeliccia borneensis	0	0	0	0	0	0	0	0	0	0	0	0	0	0	0	0	0	0	0	0
DD	Arthropods	2009		Coeliccia brachysticta	0	0	0	0	0	0	0	0	0	0	0	0	0	0	0	0	0	0	0	0
DD	Arthropods	2010		Coeliccia dorothea	0	0	0	0	0	0	0	0	0	0	0	0	0	0	0	0	0	0	0	0
DD	Arthropods	2009		Coeliccia erici	0	0	0	0	0	0	0	0	0	0	0	0	0	0	0	0	0	0	0	0
DD	Arthropods	2009		Coeliccia furcata	0	0	0	0	0	0	0	0	0	0	0	0	0	0	0	0	0	0	0	0
DD	Arthropods	2010		Coeliccia loringae	0	0	0	0	0	0	0	0	0	0	0	0	0	0	0	0	0	0	0	0
DD	Arthropods	2009		Coeliccia macrostigma	0	0	0	0	0	0	0	0	0	0	0	0	0	0	0	0	0	0	0	0
DD	Arthropods	2009		Coeliccia montana	0	0	0	0	0	0	0	0	0	0	0	0	0	0	0	0	0	0	0	0
DD	Arthropods	2009		Coeliccia nigrescens	0	0	0	0	0	0	0	0	0	0	0	0	0	0	0	0	0	0	0	0
DD	Arthropods	2009		Coeliccia pracritii	0	0	0	0	0	0	0	0	0	0	0	0	0	0	0	0	0	0	0	0
DD	Arthropods	2010		Coeliccia rossi	0	0	0	0	0	0	0	0	0	0	0	0	0	0	0	0	0	0	0	0
DD	Arthropods	2009		Coeliccia rotundata	0	0	0	0	0	0	0	0	0	0	0	0	0	0	0	0	0	0	0	0
DD	Arthropods	2009		Coeliccia sarbottama	0	0	0	0	0	0	0	0	0	0	0	0	0	0	0	0	0	0	0	0
DD	Arthropods	2009		Coeliccia schmidti	0	0	0	0	0	0	0	0	0	0	0	0	0	0	0	0	0	0	0	0
DD	Arthropods	2010		Coeliccia svihleri	0	0	0	0	0	0	0	0	0	0	0	0	0	0	0	0	0	0	0	0
DD	Arthropods	2010		Coeliccia vacca	0	0	0	0	0	0	0	0	0	0	0	0	0	0	0	0	0	0	0	0
DD	Arthropods	2006		Coenagrion australocaspicum	0	0	0	0	0	0	0	0	0	0	0	0	0	0	0	0	0	0	0	0
DD	Arthropods	2006		Coenagrion persicum	0	0	0	0	0	0	0	0	0	0	0	0	0	0	0	0	0	0	0	0
DD	Arthropods	2004		Coenagrion vanbrinkae	0	0	0	0	0	0	0	0	0	0	0	0	0	0	0	0	0	0	0	0
DD	Arthropods	2010		Copera superplatypes	0	0	0	0	0	0	0	0	0	0	0	0	0	0	0	0	0	0	0	0
DD	Arthropods	2009		Cora aurea	0	0	0	0	0	0	0	0	0	0	0	0	0	0	0	0	0	0	0	0
DD	Arthropods	2009		Cora dorada	0	0	0	0	0	0	0	0	0	0	0	0	0	0	0	0	0	0	0	0
DD	Arthropods	2010		Cordulegaster annandalei	0	0	0	0	0	0	0	0	0	0	0	0	0	0	0	0	0	0	0	0
DD	Arthropods	2009		Cordulegaster lunifera	0	0	0	0	0	0	0	0	0	0	0	0	0	0	0	0	0	0	0	0
DD	Arthropods	2006		Cordulegaster vanbrinkae	1	0	0	0	0	0	0	0	0	0	0	0	0	0	0	0	0	0	0	1
DD	Arthropods	2009		Cordulephya bidens	0	0	0	0	0	0	0	0	0	0	0	0	0	0	0	0	0	0	0	0
DD	Arthropods	2006		Cornigomphus guineensis	0	0	0	0	0	0	0	0	0	0	0	0	0	0	0	0	0	0	0	0
DD	Arthropods	2009		Cornigomphus mariannae	0	0	0	0	0	0	0	0	0	0	0	0	0	0	0	0	0	0	0	0
DD	Arthropods	2009		Crocothemis striata	0	0	0	0	0	0	0	0	0	0	0	0	0	0	0	0	0	0	0	0
DD	Arthropods	2009		Cyanallagma ovigerum	0	0	0	0	0	0	0	0	0	0	0	0	0	0	0	0	0	0	0	0
DD	Arthropods	2009		Cyanocnemis aureofrons	0	0	0	0	0	0	0	0	0	0	0	0	0	0	0	0	0	0	0	0
DD	Arthropods	2009		Cyclogomphus heterostylus	0	0	0	0	0	0	0	0	0	0	0	0	0	0	0	0	0	0	0	0
DD	Arthropods	2009		Cyclogomphus wilkinsi	0	0	0	0	0	0	0	0	0	0	0	0	0	0	0	0	0	0	0	0
DD	Arthropods	2008		Dalatomon laevior	0	0	0	0	0	0	0	0	0	0	0	0	0	0	0	0	0	0	0	0
DD	Arthropods	2008		Dalatomon loxophrys	0	0	0	0	0	0	0	0	0	0	0	0	0	0	0	0	0	0	0	0
DD	Arthropods	2010		Davidioides martini	0	0	0	0	0	0	0	0	0	0	0	0	0	0	0	0	0	0	0	0
DD	Arthropods	2010		Davidius baronii	0	0	0	0	0	0	0	0	0	0	0	0	0	0	0	0	0	0	0	0
DD	Arthropods	2009		Davidius chaoi	0	0	0	0	0	0	0	0	0	0	0	0	0	0	0	0	0	0	0	0
DD	Arthropods	2010		Davidius kumaonensis	0	0	0	0	0	0	0	0	0	0	0	0	0	0	0	0	0	0	0	0
DD	Arthropods	2010		Davidius malloryi	0	0	0	0	0	0	0	0	0	0	0	0	0	0	0	0	0	0	0	0
DD	Arthropods	2009		Davidius trox	0	0	0	0	0	0	0	0	0	0	0	0	0	0	0	0	0	0	0	0
DD	Arthropods	2009		Davidius yuanbaensis	0	0	0	0	0	0	0	0	0	0	0	0	0	0	0	0	0	0	0	0
DD	Arthropods	2009		Davidius zallorensis	0	0	0	0	0	0	0	0	0	0	0	0	0	0	0	0	0	0	0	0
DD	Arthropods	2008		Demanietta manii	0	0	0	0	0	0	0	0	0	0	0	0	0	0	0	0	0	0	0	0
DD	Arthropods	2008		Demanietta merguensis	0	0	0	0	0	0	0	0	0	0	0	0	0	0	0	0	0	0	0	0
DD	Arthropods	2008		Demanietta thagatensis	0	0	0	0	0	0	0	0	0	0	0	0	0	0	0	0	0	0	0	0
DD	Arthropods	2010		Denticollis interpositus	0	0	0	0	0	0	0	0	0	0	0	0	0	0	0	0	0	0	0	0
DD	Arthropods	2006		Diceratobasis macrogaster	0	0	0	0	0	0	0	0	0	0	0	0	0	0	0	0	0	0	0	0
DD	Arthropods	2006		Diceratobasis melanogaster	0	0	0	0	0	0	0	0	0	0	0	0	0	0	0	0	0	0	0	0
DD	Arthropods	2006		Dicterias atrosanguinea	0	0	0	0	0	0	0	0	0	0	0	0	0	0	0	0	0	0	0	0
DD	Arthropods	2008		Dilocarcinus truncatus	0	0	0	0	0	0	0	0	0	0	0	0	0	0	0	0	0	0	0	0
DD	Arthropods	2009		Diplacina cyrene	0	0	0	0	0	0	0	0	0	0	0	0	0	0	0	0	0	0	0	0
DD	Arthropods	2009		Diplacina micans	0	0	0	0	0	0	0	0	0	0	0	0	0	0	0	0	0	0	0	0
DD	Arthropods	2008		Disparithelphusa pecki	0	0	0	0	0	0	0	0	0	0	0	0	0	0	0	0	0	0	0	0
DD	Arthropods	2010		Distocambarus carlsoni	0	0	0	0	0	0	0	0	0	0	0	0	0	0	0	0	0	0	0	0
DD	Arthropods	2010		Distocambarus crockeri	3	0	0	0	0	0	0	0	0	0	0	1	1	0	0	0	0	0	1	0
DD	Arthropods	2010		Distocambarus devexus	0	0	0	0	0	0	0	0	0	0	0	0	0	0	0	0	0	0	0	0
DD	Arthropods	2008		Doimon maehongsonense	0	0	0	0	0	0	0	0	0	0	0	0	0	0	0	0	0	0	0	0
DD	Arthropods	2006		Doratogonus bilobatus	0	0	0	0	0	0	0	0	0	0	0	0	0	0	0	0	0	0	0	0
DD	Arthropods	2006		Doratogonus circulus	0	0	0	0	0	0	0	0	0	0	0	0	0	0	0	0	0	0	0	0
DD	Arthropods	2006		Doratogonus subpartitus	0	0	0	0	0	0	0	0	0	0	0	0	0	0	0	0	0	0	0	0
DD	Arthropods	2006		Doratogonus transvaalensis	0	0	0	0	0	0	0	0	0	0	0	0	0	0	0	0	0	0	0	0
DD	Arthropods	2009		Drepanosticta attala	0	0	0	0	0	0	0	0	0	0	0	0	0	0	0	0	0	0	0	0
DD	Arthropods	2009		Drepanosticta berlandi	0	0	0	0	0	0	0	0	0	0	0	0	0	0	0	0	0	0	0	0
DD	Arthropods	2009		Drepanosticta conica	1	0	0	0	0	0	0	0	0	0	0	0	0	0	0	0	0	0	0	1
DD	Arthropods	2009		Drepanosticta exoleta	0	0	0	0	0	0	0	0	0	0	0	0	0	0	0	0	0	0	0	0
DD	Arthropods	2009		Drepanosticta hamadryas	0	0	0	0	0	0	0	0	0	0	0	0	0	0	0	0	0	0	0	0
DD	Arthropods	2009		Drepanosticta kruegeri	0	0	0	0	0	0	0	0	0	0	0	0	0	0	0	0	0	0	0	0
DD	Arthropods	2009		Drepanosticta lepyricollis	0	0	0	0	0	0	0	0	0	0	0	0	0	0	0	0	0	0	0	0
DD	Arthropods	2009		Drepanosticta palauensis	0	0	0	0	0	0	0	0	0	0	0	0	0	0	0	0	0	0	0	0
DD	Arthropods	2009		Drepanosticta pan	0	0	0	0	0	0	0	0	0	0	0	0	0	0	0	0	0	0	0	0
DD	Arthropods	2010		Drepanosticta polychromatica	0	0	0	0	0	0	0	0	0	0	0	0	0	0	0	0	0	0	0	0
DD	Arthropods	2009		Drepanosticta sharpi	0	0	0	0	0	0	0	0	0	0	0	0	0	0	0	0	0	0	0	0
DD	Arthropods	2009		Drepanosticta spatulifera	0	0	0	0	0	0	0	0	0	0	0	0	0	0	0	0	0	0	0	0
DD	Arthropods	2009		Drepanosticta sundana	0	0	0	0	0	0	0	0	0	0	0	0	0	0	0	0	0	0	0	0
DD	Arthropods	2009		Drepanosticta tenella	0	0	0	0	0	0	0	0	0	0	0	0	0	0	0	0	0	0	0	0
DD	Arthropods	2009		Drepanosticta walli	0	0	0	0	0	0	0	0	0	0	0	0	0	0	0	0	0	0	0	0
DD	Arthropods	2008		Dromothelphusa longipes	0	0	0	0	0	0	0	0	0	0	0	0	0	0	0	0	0	0	0	0
DD	Arthropods	2010		Dubitogomphus bidentatus	0	0	0	0	0	0	0	0	0	0	0	0	0	0	0	0	0	0	0	0
DD	Arthropods	2009		Dysphaea ethela	0	0	0	0	0	0	0	0	0	0	0	0	0	0	0	0	0	0	0	0
DD	Arthropods	2010		Dysphaea walli	0	0	0	0	0	0	0	0	0	0	0	0	0	0	0	0	0	0	0	0
DD	Arthropods	2009		Ebegomphus schroederi	0	0	0	0	0	0	0	0	0	0	0	0	0	0	0	0	0	0	0	0
DD	Arthropods	2008		Eidocamptophallus chacei	1	0	0	0	0	0	0	0	0	0	0	0	0	0	0	0	0	0	0	1
DD	Arthropods	2010		Elattoneura campioni	0	0	0	0	0	0	0	0	0	0	0	0	0	0	0	0	0	0	0	0
DD	Arthropods	2010		Elattoneura morini	0	0	0	0	0	0	0	0	0	0	0	0	0	0	0	0	0	0	0	0
DD	Arthropods	2009		Elattoneura nihari	0	0	0	0	0	0	0	0	0	0	0	0	0	0	0	0	0	0	0	0
DD	Arthropods	2009		Elattoneura perisi	0	0	0	0	0	0	0	0	0	0	0	0	0	0	0	0	0	0	0	0
DD	Arthropods	2008		Elsalvadoria tomhaasi	0	0	0	0	0	0	0	0	0	0	0	0	0	0	0	0	0	0	0	0
DD	Arthropods	2010		Engaeus affinis	0	0	0	0	0	0	0	0	0	0	0	0	0	0	0	0	0	0	0	0
DD	Arthropods	2010		Engaeus curvisuturus	0	0	0	0	0	0	0	0	0	0	0	0	0	0	0	0	0	0	0	0
DD	Arthropods	2010		Engaeus karnanga	0	0	0	0	0	0	0	0	0	0	0	0	0	0	0	0	0	0	0	0
DD	Arthropods	2010		Engaeus laevis	0	0	0	0	0	0	0	0	0	0	0	0	0	0	0	0	0	0	0	0
DD	Arthropods	2010		Engaeus nulloporius	0	0	0	0	0	0	0	0	0	0	0	0	0	0	0	0	0	0	0	0
DD	Arthropods	2008		Eosamon brousmichei	0	0	0	0	0	0	0	0	0	0	0	0	0	0	0	0	0	0	0	0
DD	Arthropods	2008		Eosamon hafniense	0	0	0	0	0	0	0	0	0	0	0	0	0	0	0	0	0	0	0	0
DD	Arthropods	2008		Eosamon lushuiense	0	0	0	0	0	0	0	0	0	0	0	0	0	0	0	0	0	0	0	0
DD	Arthropods	2008		Eosamon paludosum	0	0	0	0	0	0	0	0	0	0	0	0	0	0	0	0	0	0	0	0
DD	Arthropods	2008		Eosamon phuphanense	0	0	0	0	0	0	0	0	0	0	0	0	0	0	0	0	0	0	0	0
DD	Arthropods	2008		Eosamon tengchonense	0	0	0	0	0	0	0	0	0	0	0	0	0	0	0	0	0	0	0	0
DD	Arthropods	2008		Eosamon tumidum	0	0	0	0	0	0	0	0	0	0	0	0	0	0	0	0	0	0	0	0
DD	Arthropods	2008		Eosamon yotdomense	0	0	0	0	0	0	0	0	0	0	0	0	0	0	0	0	0	0	0	0
DD	Arthropods	2009		Epigomphus compactus	0	0	0	0	0	0	0	0	0	0	0	0	0	0	0	0	0	0	0	0
DD	Arthropods	2006		Epigomphus crepidus	0	0	0	0	0	0	0	0	0	0	0	0	0	0	0	0	0	0	0	0
DD	Arthropods	2009		Epipleoneura albuquerquei	0	0	0	0	0	0	0	0	0	0	0	0	0	0	0	0	0	0	0	0
DD	Arthropods	2009		Epipleoneura letitia	1	0	0	0	0	0	0	0	0	0	0	0	0	1	0	0	0	0	0	0
DD	Arthropods	2009		Epipleoneura pereirai	0	0	0	0	0	0	0	0	0	0	0	0	0	0	0	0	0	0	0	0
DD	Arthropods	2009		Epipleoneura tariana	0	0	0	0	0	0	0	0	0	0	0	0	0	0	0	0	0	0	0	0
DD	Arthropods	2009		Epipleoneura uncinata	0	0	0	0	0	0	0	0	0	0	0	0	0	0	0	0	0	0	0	0
DD	Arthropods	2008		Epithelphusa chiapensis	0	0	0	0	0	0	0	0	0	0	0	0	0	0	0	0	0	0	0	0
DD	Arthropods	2008		Epithelphusa mixtepensis	0	0	0	0	0	0	0	0	0	0	0	0	0	0	0	0	0	0	0	0
DD	Arthropods	2008		Erimetopus vandenbrandeni	1	0	0	0	0	0	0	0	0	1	0	0	0	0	0	0	0	0	0	0
DD	Arthropods	2006		Erpetogomphus heterodon	0	0	0	0	0	0	0	0	0	0	0	0	0	0	0	0	0	0	0	0
DD	Arthropods	2009		Erpetogomphus leptophis	0	0	0	0	0	0	0	0	0	0	0	0	0	0	0	0	0	0	0	0
DD	Arthropods	2009		Erythrodiplax cauca	0	0	0	0	0	0	0	0	0	0	0	0	0	0	0	0	0	0	0	0
DD	Arthropods	2009		Erythrodiplax diversa	0	0	0	0	0	0	0	0	0	0	0	0	0	0	0	0	0	0	0	0
DD	Arthropods	2008		Esanthelphusa nani	1	0	0	0	0	0	0	0	0	0	0	0	0	0	0	0	1	0	0	0
DD	Arthropods	2008		Esanthelphusa prolatus	0	0	0	0	0	0	0	0	0	0	0	0	0	0	0	0	0	0	0	0
DD	Arthropods	2010		Euastacus armatus	7	0	0	0	0	0	0	0	0	0	0	0	1	0	0	2	1	2	0	1
DD	Arthropods	2008		Eudaniela pestai	1	0	0	0	0	0	1	0	0	0	0	0	0	0	0	0	0	0	0	0
DD	Arthropods	2009		Euthore fassli	0	0	0	0	0	0	0	0	0	0	0	0	0	0	0	0	0	0	0	0
DD	Arthropods	2009		Euthore mirabilis	0	0	0	0	0	0	0	0	0	0	0	0	0	0	0	0	0	0	0	0
DD	Arthropods	2010		Fallicambarus burrisi	0	0	0	0	0	0	0	0	0	0	0	0	0	0	0	0	0	0	0	0
DD	Arthropods	2010		Fallicambarus dissitus	0	0	0	0	0	0	0	0	0	0	0	0	0	0	0	0	0	0	0	0
DD	Arthropods	2008		Flabellamon kuehnelti	1	1	0	0	0	0	0	0	0	0	0	0	0	0	0	0	0	0	0	0
DD	Arthropods	2009		Forcepsioneura itatiaiae	0	0	0	0	0	0	0	0	0	0	0	0	0	0	0	0	0	0	0	0
DD	Arthropods	2008		Fredilocarcinus raddai	0	0	0	0	0	0	0	0	0	0	0	0	0	0	0	0	0	0	0	0
DD	Arthropods	2008		Fredius adpressus	0	0	0	0	0	0	0	0	0	0	0	0	0	0	0	0	0	0	0	0
DD	Arthropods	2008		Gecarcinucus edwardsi	0	0	0	0	0	0	0	0	0	0	0	0	0	0	0	0	0	0	0	0
DD	Arthropods	2008		Geelvinkia ambaiana	0	0	0	0	0	0	0	0	0	0	0	0	0	0	0	0	0	0	0	0
DD	Arthropods	2008		Geelvinkia calmani	0	0	0	0	0	0	0	0	0	0	0	0	0	0	0	0	0	0	0	0
DD	Arthropods	2008		Geelvinkia holthuisi	0	0	0	0	0	0	0	0	0	0	0	0	0	0	0	0	0	0	0	0
DD	Arthropods	2008		Geothelphusa chiui	1	0	0	0	0	0	0	0	0	0	0	0	0	0	0	1	0	0	0	0
DD	Arthropods	2008		Geothelphusa eucrinodonta	0	0	0	0	0	0	0	0	0	0	0	0	0	0	0	0	0	0	0	0
DD	Arthropods	2008		Geothelphusa eurysoma	0	0	0	0	0	0	0	0	0	0	0	0	0	0	0	0	0	0	0	0
DD	Arthropods	2008		Geothelphusa ferruginea	0	0	0	0	0	0	0	0	0	0	0	0	0	0	0	0	0	0	0	0
DD	Arthropods	2008		Geothelphusa gracilipes	0	0	0	0	0	0	0	0	0	0	0	0	0	0	0	0	0	0	0	0
DD	Arthropods	2008		Geothelphusa ilan	0	0	0	0	0	0	0	0	0	0	0	0	0	0	0	0	0	0	0	0
DD	Arthropods	2008		Geothelphusa tali	0	0	0	0	0	0	0	0	0	0	0	0	0	0	0	0	0	0	0	0
DD	Arthropods	2008		Geothelphusa tawu	0	0	0	0	0	0	0	0	0	0	0	0	0	0	0	0	0	0	0	0
DD	Arthropods	2008		Globitelphusa bakeri	0	0	0	0	0	0	0	0	0	0	0	0	0	0	0	0	0	0	0	0
DD	Arthropods	2008		Globitelphusa cylindra	0	0	0	0	0	0	0	0	0	0	0	0	0	0	0	0	0	0	0	0
DD	Arthropods	2008		Globitelphusa pistorica	0	0	0	0	0	0	0	0	0	0	0	0	0	0	0	0	0	0	0	0
DD	Arthropods	2008		Globitelphusa planifrons	0	0	0	0	0	0	0	0	0	0	0	0	0	0	0	0	0	0	0	0
DD	Arthropods	2009		Gomphidia kodaguensis	0	0	0	0	0	0	0	0	0	0	0	0	0	0	0	0	0	0	0	0
DD	Arthropods	2010		Gomphidia leonorae	0	0	0	0	0	0	0	0	0	0	0	0	0	0	0	0	0	0	0	0
DD	Arthropods	2009		Gomphidia williamsoni	0	0	0	0	0	0	0	0	0	0	0	0	0	0	0	0	0	0	0	0
DD	Arthropods	2009		Gomphus amseli	0	0	0	0	0	0	0	0	0	0	0	0	0	0	0	0	0	0	0	0
DD	Arthropods	2006		Gomphus gonzalezi	0	0	0	0	0	0	0	0	0	0	0	0	0	0	0	0	0	0	0	0
DD	Arthropods	2006		Gomphus kinzelbachi	0	0	0	0	0	0	0	0	0	0	0	0	0	0	0	0	0	0	0	0
DD	Arthropods	2008		Gubernatoriana escheri	0	0	0	0	0	0	0	0	0	0	0	0	0	0	0	0	0	0	0	0
DD	Arthropods	2008		Gubernatoriana gubernatoris	1	0	0	0	0	0	0	0	0	0	0	0	0	0	0	0	0	0	0	1
DD	Arthropods	2008		Gubernatoriana pilosipes	1	0	0	0	0	0	0	0	0	0	0	0	0	0	0	0	0	0	0	1
DD	Arthropods	2008		Guinothusa beauvoisi	0	0	0	0	0	0	0	0	0	0	0	0	0	0	0	0	0	0	0	0
DD	Arthropods	2008		Guinothusa harmandi	0	0	0	0	0	0	0	0	0	0	0	0	0	0	0	0	0	0	0	0
DD	Arthropods	2010		Gynacantha albistyla	0	0	0	0	0	0	0	0	0	0	0	0	0	0	0	0	0	0	0	0
DD	Arthropods	2009		Gynacantha apiaensis	0	0	0	0	0	0	0	0	0	0	0	0	0	0	0	0	0	0	0	0
DD	Arthropods	2010		Gynacantha apicalis	0	0	0	0	0	0	0	0	0	0	0	0	0	0	0	0	0	0	0	0
DD	Arthropods	2009		Gynacantha arnaudi	0	0	0	0	0	0	0	0	0	0	0	0	0	0	0	0	0	0	0	0
DD	Arthropods	2009		Gynacantha arthuri	0	0	0	0	0	0	0	0	0	0	0	0	0	0	0	0	0	0	0	0
DD	Arthropods	2010		Gynacantha bainbriggei	0	0	0	0	0	0	0	0	0	0	0	0	0	0	0	0	0	0	0	0
DD	Arthropods	2010		Gynacantha biharica	0	0	0	0	0	0	0	0	0	0	0	0	0	0	0	0	0	0	0	0
DD	Arthropods	2010		Gynacantha burmana	0	0	0	0	0	0	0	0	0	0	0	0	0	0	0	0	0	0	0	0
DD	Arthropods	2009		Gynacantha chelifera	0	0	0	0	0	0	0	0	0	0	0	0	0	0	0	0	0	0	0	0
DD	Arthropods	2010		Gynacantha dravida	0	0	0	0	0	0	0	0	0	0	0	0	0	0	0	0	0	0	0	0
DD	Arthropods	2009		Gynacantha hova	0	0	0	0	0	0	0	0	0	0	0	0	0	0	0	0	0	0	0	0
DD	Arthropods	2009		Gynacantha jessei	0	0	0	0	0	0	0	0	0	0	0	0	0	0	0	0	0	0	0	0
DD	Arthropods	2010		Gynacantha khasiaca	0	0	0	0	0	0	0	0	0	0	0	0	0	0	0	0	0	0	0	0
DD	Arthropods	2009		Gynacantha maclachlani	0	0	0	0	0	0	0	0	0	0	0	0	0	0	0	0	0	0	0	0
DD	Arthropods	2010		Gynacantha odoneli	0	0	0	0	0	0	0	0	0	0	0	0	0	0	0	0	0	0	0	0
DD	Arthropods	2009		Gynacantha phaeomeria	0	0	0	0	0	0	0	0	0	0	0	0	0	0	0	0	0	0	0	0
DD	Arthropods	2010		Gynacantha rammohani	0	0	0	0	0	0	0	0	0	0	0	0	0	0	0	0	0	0	0	0
DD	Arthropods	2010		Gynacantha rotundata	0	0	0	0	0	0	0	0	0	0	0	0	0	0	0	0	0	0	0	0
DD	Arthropods	2009		Gynacantha stevensoni	0	0	0	0	0	0	0	0	0	0	0	0	0	0	0	0	0	0	0	0
DD	Arthropods	2008		Hainanpotamon fuchengense	0	0	0	0	0	0	0	0	0	0	0	0	0	0	0	0	0	0	0	0
DD	Arthropods	2008		Hainanpotamon globosum	0	0	0	0	0	0	0	0	0	0	0	0	0	0	0	0	0	0	0	0
DD	Arthropods	2008		Hainanpotamon helense	0	0	0	0	0	0	0	0	0	0	0	0	0	0	0	0	0	0	0	0
DD	Arthropods	2010		Haterumelater schembrii	0	0	0	0	0	0	0	0	0	0	0	0	0	0	0	0	0	0	0	0
DD	Arthropods	2010		Haterumelater tauricola	0	0	0	0	0	0	0	0	0	0	0	0	0	0	0	0	0	0	0	0
DD	Arthropods	2010		Heliogomphus spirillus	0	0	0	0	0	0	0	0	0	0	0	0	0	0	0	0	0	0	0	0
DD	Arthropods	2010		Heliogomphus svihleri	0	0	0	0	0	0	0	0	0	0	0	0	0	0	0	0	0	0	0	0
DD	Arthropods	2009		Hemicordulia hilbrandi	0	0	0	0	0	0	0	0	0	0	0	0	0	0	0	0	0	0	0	0
DD	Arthropods	2009		Hemicordulia mumfordi	0	0	0	0	0	0	0	0	0	0	0	0	0	0	0	0	0	0	0	0
DD	Arthropods	2009		Hemicordulia oceanica	0	0	0	0	0	0	0	0	0	0	0	0	0	0	0	0	0	0	0	0
DD	Arthropods	2009		Hetaerina gallardi	0	0	0	0	0	0	0	0	0	0	0	0	0	0	0	0	0	0	0	0
DD	Arthropods	2009		Hetaerina indeprensa	0	0	0	0	0	0	0	0	0	0	0	0	0	0	0	0	0	0	0	0
DD	Arthropods	2009		Hetaerina mendezi	1	0	0	0	0	0	0	0	0	0	0	0	1	0	0	0	0	0	0	0
DD	Arthropods	2009		Heteragrion calendulum	0	0	0	0	0	0	0	0	0	0	0	0	0	0	0	0	0	0	0	0
DD	Arthropods	2009		Heteragrion dorsale	1	0	0	0	0	0	0	0	0	0	0	1	0	0	0	0	0	0	0	0
DD	Arthropods	2009		Heteragrion flavidorsum	0	0	0	0	0	0	0	0	0	0	0	0	0	0	0	0	0	0	0	0
DD	Arthropods	2009		Heteragrion melanurum	0	0	0	0	0	0	0	0	0	0	0	0	0	0	0	0	0	0	0	0
DD	Arthropods	2009		Heteragrion triangulare	0	0	0	0	0	0	0	0	0	0	0	0	0	0	0	0	0	0	0	0
DD	Arthropods	2008		Heterochelamon purpureomanualis	0	0	0	0	0	0	0	0	0	0	0	0	0	0	0	0	0	0	0	0
DD	Arthropods	2010		Himalagrion exclamationis	0	0	0	0	0	0	0	0	0	0	0	0	0	0	0	0	0	0	0	0
DD	Arthropods	2010		Himalagrion pithoragarhicus	0	0	0	0	0	0	0	0	0	0	0	0	0	0	0	0	0	0	0	0
DD	Arthropods	2008		Himalayapotamon ambivium	0	0	0	0	0	0	0	0	0	0	0	0	0	0	0	0	0	0	0	0
DD	Arthropods	2008		Himalayapotamon babaulti	0	0	0	0	0	0	0	0	0	0	0	0	0	0	0	0	0	0	0	0
DD	Arthropods	2008		Himalayapotamon bifarium	0	0	0	0	0	0	0	0	0	0	0	0	0	0	0	0	0	0	0	0
DD	Arthropods	2008		Himalayapotamon kausalis	0	0	0	0	0	0	0	0	0	0	0	0	0	0	0	0	0	0	0	0
DD	Arthropods	2008		Himalayapotamon marinelli	0	0	0	0	0	0	0	0	0	0	0	0	0	0	0	0	0	0	0	0
DD	Arthropods	2008		Himalayapotamon monticola	0	0	0	0	0	0	0	0	0	0	0	0	0	0	0	0	0	0	0	0
DD	Arthropods	2009		Hivaagrion demorsum	0	0	0	0	0	0	0	0	0	0	0	0	0	0	0	0	0	0	0	0
DD	Arthropods	2009		Hivaagrion halecarpenteri	0	0	0	0	0	0	0	0	0	0	0	0	0	0	0	0	0	0	0	0
DD	Arthropods	2010		Hobbseus attenuatus	0	0	0	0	0	0	0	0	0	0	0	0	0	0	0	0	0	0	0	0
DD	Arthropods	2010		Hobbseus cristatus	0	0	0	0	0	0	0	0	0	0	0	0	0	0	0	0	0	0	0	0
DD	Arthropods	2010		Hobbseus petilus	0	0	0	0	0	0	0	0	0	0	0	0	0	0	0	0	0	0	0	0
DD	Arthropods	2008		Holthuisana beauforti	0	0	0	0	0	0	0	0	0	0	0	0	0	0	0	0	0	0	0	0
DD	Arthropods	2008		Holthuisana briggsi	0	0	0	0	0	0	0	0	0	0	0	0	0	0	0	0	0	0	0	0
DD	Arthropods	2008		Holthuisana festiva	0	0	0	0	0	0	0	0	0	0	0	0	0	0	0	0	0	0	0	0
DD	Arthropods	2008		Holthuisana loriae	0	0	0	0	0	0	0	0	0	0	0	0	0	0	0	0	0	0	0	0
DD	Arthropods	2008		Holthuisana vanheurni	0	0	0	0	0	0	0	0	0	0	0	0	0	0	0	0	0	0	0	0
DD	Arthropods	2008		Holthuisana wollastoni	0	0	0	0	0	0	0	0	0	0	0	0	0	0	0	0	0	0	0	0
DD	Arthropods	2009		Homeoura silviae	0	0	0	0	0	0	0	0	0	0	0	0	0	0	0	0	0	0	0	0
DD	Arthropods	2008		Huananpotamon angulatum	0	0	0	0	0	0	0	0	0	0	0	0	0	0	0	0	0	0	0	0
DD	Arthropods	2008		Huananpotamon chongrenense	0	0	0	0	0	0	0	0	0	0	0	0	0	0	0	0	0	0	0	0
DD	Arthropods	2008		Huananpotamon guixiense	0	0	0	0	0	0	0	0	0	0	0	0	0	0	0	0	0	0	0	0
DD	Arthropods	2008		Huananpotamon lichuanense	0	0	0	0	0	0	0	0	0	0	0	0	0	0	0	0	0	0	0	0
DD	Arthropods	2008		Huananpotamon medium	0	0	0	0	0	0	0	0	0	0	0	0	0	0	0	0	0	0	0	0
DD	Arthropods	2008		Huananpotamon nanchengense	0	0	0	0	0	0	0	0	0	0	0	0	0	0	0	0	0	0	0	0
DD	Arthropods	2008		Huananpotamon obtusum	0	0	0	0	0	0	0	0	0	0	0	0	0	0	0	0	0	0	0	0
DD	Arthropods	2008		Huananpotamon planopodum	0	0	0	0	0	0	0	0	0	0	0	0	0	0	0	0	0	0	0	0
DD	Arthropods	2008		Huananpotamon ramipodum	0	0	0	0	0	0	0	0	0	0	0	0	0	0	0	0	0	0	0	0
DD	Arthropods	2008		Huananpotamon ruijinense	0	0	0	0	0	0	0	0	0	0	0	0	0	0	0	0	0	0	0	0
DD	Arthropods	2008		Huananpotamon yiyangense	0	0	0	0	0	0	0	0	0	0	0	0	0	0	0	0	0	0	0	0
DD	Arthropods	2009		Huonia ferentina	0	0	0	0	0	0	0	0	0	0	0	0	0	0	0	0	0	0	0	0
DD	Arthropods	2009		Huonia moerens	0	0	0	0	0	0	0	0	0	0	0	0	0	0	0	0	0	0	0	0
DD	Arthropods	2009		Hydrobasileus vittatus	0	0	0	0	0	0	0	0	0	0	0	0	0	0	0	0	0	0	0	0
DD	Arthropods	2009		Hylaeargia magnifica	0	0	0	0	0	0	0	0	0	0	0	0	0	0	0	0	0	0	0	0
DD	Arthropods	2006		Hylaeonympha magoi	0	0	0	0	0	0	0	0	0	0	0	0	0	0	0	0	0	0	0	0
DD	Arthropods	2010		Hylaeothemis gardeneri	0	0	0	0	0	0	0	0	0	0	0	0	0	0	0	0	0	0	0	0
DD	Arthropods	2009		Hylaeothemis indica	0	0	0	0	0	0	0	0	0	0	0	0	0	0	0	0	0	0	0	0
DD	Arthropods	2010		Hylis slipinskii	0	0	0	0	0	0	0	0	0	0	0	0	0	0	0	0	0	0	0	0
DD	Arthropods	2008		Hypolobocera buenaventurensis	0	0	0	0	0	0	0	0	0	0	0	0	0	0	0	0	0	0	0	0
DD	Arthropods	2008		Hypolobocera canaensis	0	0	0	0	0	0	0	0	0	0	0	0	0	0	0	0	0	0	0	0
DD	Arthropods	2008		Hypolobocera delsolari	0	0	0	0	0	0	0	0	0	0	0	0	0	0	0	0	0	0	0	0
DD	Arthropods	2008		Hypolobocera dentata	0	0	0	0	0	0	0	0	0	0	0	0	0	0	0	0	0	0	0	0
DD	Arthropods	2008		Hypolobocera emberarum	1	0	0	0	0	1	0	0	0	0	0	0	0	0	0	0	0	0	0	0
DD	Arthropods	2008		Hypolobocera gibberimana	0	0	0	0	0	0	0	0	0	0	0	0	0	0	0	0	0	0	0	0
DD	Arthropods	2008		Hypolobocera guayaquilensis	0	0	0	0	0	0	0	0	0	0	0	0	0	0	0	0	0	0	0	0
DD	Arthropods	2008		Hypolobocera kamsarum	0	0	0	0	0	0	0	0	0	0	0	0	0	0	0	0	0	0	0	0
DD	Arthropods	2008		Hypolobocera lamercedes	0	0	0	0	0	0	0	0	0	0	0	0	0	0	0	0	0	0	0	0
DD	Arthropods	2008		Hypolobocera malagena	0	0	0	0	0	0	0	0	0	0	0	0	0	0	0	0	0	0	0	0
DD	Arthropods	2008		Hypolobocera mutisi	0	0	0	0	0	0	0	0	0	0	0	0	0	0	0	0	0	0	0	0
DD	Arthropods	2008		Hypolobocera orcesi	0	0	0	0	0	0	0	0	0	0	0	0	0	0	0	0	0	0	0	0
DD	Arthropods	2008		Hypolobocera smalleyi	0	0	0	0	0	0	0	0	0	0	0	0	0	0	0	0	0	0	0	0
DD	Arthropods	2008		Hypolobocera steindachneri	0	0	0	0	0	0	0	0	0	0	0	0	0	0	0	0	0	0	0	0
DD	Arthropods	2009		Hypothemis hageni	0	0	0	0	0	0	0	0	0	0	0	0	0	0	0	0	0	0	0	0
DD	Arthropods	2008		Ibanum bicristatum	0	0	0	0	0	0	0	0	0	0	0	0	0	0	0	0	0	0	0	0
DD	Arthropods	2009		Ictinogomphus celebensis	0	0	0	0	0	0	0	0	0	0	0	0	0	0	0	0	0	0	0	0
DD	Arthropods	2009		Ictinogomphus distinctus	0	0	0	0	0	0	0	0	0	0	0	0	0	0	0	0	0	0	0	0
DD	Arthropods	2009		Ictinogomphus kishori	0	0	0	0	0	0	0	0	0	0	0	0	0	0	0	0	0	0	0	0
DD	Arthropods	2009		Idiocnemis fissidens	0	0	0	0	0	0	0	0	0	0	0	0	0	0	0	0	0	0	0	0
DD	Arthropods	2009		Idiocnemis huonensis	0	0	0	0	0	0	0	0	0	0	0	0	0	0	0	0	0	0	0	0
DD	Arthropods	2009		Idiogomphoides emmeli	0	0	0	0	0	0	0	0	0	0	0	0	0	0	0	0	0	0	0	0
DD	Arthropods	2010		Idionyx imbricata	0	0	0	0	0	0	0	0	0	0	0	0	0	0	0	0	0	0	0	0
DD	Arthropods	2009		Idionyx minima	0	0	0	0	0	0	0	0	0	0	0	0	0	0	0	0	0	0	0	0
DD	Arthropods	2009		Idionyx montana	0	0	0	0	0	0	0	0	0	0	0	0	0	0	0	0	0	0	0	0
DD	Arthropods	2009		Idionyx saffronata	0	0	0	0	0	0	0	0	0	0	0	0	0	0	0	0	0	0	0	0
DD	Arthropods	2009		Idionyx travancorensis	0	0	0	0	0	0	0	0	0	0	0	0	0	0	0	0	0	0	0	0
DD	Arthropods	2009		Idionyx unguiculata	0	0	0	0	0	0	0	0	0	0	0	0	0	0	0	0	0	0	0	0
DD	Arthropods	2008		Indochinamon andersonianum	0	0	0	0	0	0	0	0	0	0	0	0	0	0	0	0	0	0	0	0
DD	Arthropods	2008		Indochinamon asperatum	0	0	0	0	0	0	0	0	0	0	0	0	0	0	0	0	0	0	0	0
DD	Arthropods	2008		Indochinamon beieri	0	0	0	0	0	0	0	0	0	0	0	0	0	0	0	0	0	0	0	0
DD	Arthropods	2008		Indochinamon boshanense	0	0	0	0	0	0	0	0	0	0	0	0	0	0	0	0	0	0	0	0
DD	Arthropods	2008		Indochinamon changpoense	0	0	0	0	0	0	0	0	0	0	0	0	0	0	0	0	0	0	0	0
DD	Arthropods	2008		Indochinamon chinghungense	0	0	0	0	0	0	0	0	0	0	0	0	0	0	0	0	0	0	0	0
DD	Arthropods	2008		Indochinamon daweishanense	0	0	0	0	0	0	0	0	0	0	0	0	0	0	0	0	0	0	0	0
DD	Arthropods	2008		Indochinamon edwardsi	0	0	0	0	0	0	0	0	0	0	0	0	0	0	0	0	0	0	0	0
DD	Arthropods	2008		Indochinamon flexum	0	0	0	0	0	0	0	0	0	0	0	0	0	0	0	0	0	0	0	0
DD	Arthropods	2008		Indochinamon gengmaense	0	0	0	0	0	0	0	0	0	0	0	0	0	0	0	0	0	0	0	0
DD	Arthropods	2008		Indochinamon hirtum	0	0	0	0	0	0	0	0	0	0	0	0	0	0	0	0	0	0	0	0
DD	Arthropods	2008		Indochinamon hispidum	0	0	0	0	0	0	0	0	0	0	0	0	0	0	0	0	0	0	0	0
DD	Arthropods	2008		Indochinamon jianchuanense	0	0	0	0	0	0	0	0	0	0	0	0	0	0	0	0	0	0	0	0
DD	Arthropods	2008		Indochinamon jinpingense	0	0	0	0	0	0	0	0	0	0	0	0	0	0	0	0	0	0	0	0
DD	Arthropods	2008		Indochinamon kimboiense	1	0	0	0	0	0	0	0	0	0	0	0	0	0	0	0	1	0	0	0
DD	Arthropods	2008		Indochinamon lipkei	0	0	0	0	0	0	0	0	0	0	0	0	0	0	0	0	0	0	0	0
DD	Arthropods	2008		Indochinamon manipurense	0	0	0	0	0	0	0	0	0	0	0	0	0	0	0	0	0	0	0	0
DD	Arthropods	2008		Indochinamon orleansi	0	0	0	0	0	0	0	0	0	0	0	0	0	0	0	0	0	0	0	0
DD	Arthropods	2008		Indochinamon tannanti	0	0	0	0	0	0	0	0	0	0	0	0	0	0	0	0	0	0	0	0
DD	Arthropods	2008		Indochinamon tritum	0	0	0	0	0	0	0	0	0	0	0	0	0	0	0	0	0	0	0	0
DD	Arthropods	2008		Indochinamon xinpingense	0	0	0	0	0	0	0	0	0	0	0	0	0	0	0	0	0	0	0	0
DD	Arthropods	2008		Indochinamon yunlongense	0	0	0	0	0	0	0	0	0	0	0	0	0	0	0	0	0	0	0	0
DD	Arthropods	2009		Indocypha katharina	1	0	0	0	0	0	0	0	1	0	0	0	0	0	0	0	0	0	0	0
DD	Arthropods	2009		Indolestes alleni	0	0	0	0	0	0	0	0	0	0	0	0	0	0	0	0	0	0	0	0
DD	Arthropods	2009		Indolestes anomalus	0	0	0	0	0	0	0	0	0	0	0	0	0	0	0	0	0	0	0	0
DD	Arthropods	2009		Indolestes assamicus	0	0	0	0	0	0	0	0	0	0	0	0	0	0	0	0	0	0	0	0
DD	Arthropods	2009		Indolestes bilineatus	0	0	0	0	0	0	0	0	0	0	0	0	0	0	0	0	0	0	0	0
DD	Arthropods	2010		Indolestes inflatus	0	0	0	0	0	0	0	0	0	0	0	0	0	0	0	0	0	0	0	0
DD	Arthropods	2008		Inglethelphusa fronto	0	0	0	0	0	0	0	0	0	0	0	0	0	0	0	0	0	0	0	0
DD	Arthropods	2008		Inlethelphusa acanthica	0	0	0	0	0	0	0	0	0	0	0	0	0	0	0	0	0	0	0	0
DD	Arthropods	2009		Inpabasis hubelli	0	0	0	0	0	0	0	0	0	0	0	0	0	0	0	0	0	0	0	0
DD	Arthropods	2008		Insulamon unicorn	1	0	0	0	0	0	0	0	0	0	0	0	0	0	0	0	0	1	0	0
DD	Arthropods	2009		Ischnura albistigma	0	0	0	0	0	0	0	0	0	0	0	0	0	0	0	0	0	0	0	0
DD	Arthropods	2009		Ischnura buxtoni	0	0	0	0	0	0	0	0	0	0	0	0	0	0	0	0	0	0	0	0
DD	Arthropods	2008		Isolapotamon beeliae	0	0	0	0	0	0	0	0	0	0	0	0	0	0	0	0	0	0	0	0
DD	Arthropods	2008		Isolapotamon doriae	0	0	0	0	0	0	0	0	0	0	0	0	0	0	0	0	0	0	0	0
DD	Arthropods	2008		Isolapotamon grusophallus	0	0	0	0	0	0	0	0	0	0	0	0	0	0	0	0	0	0	0	0
DD	Arthropods	2008		Isolapotamon mahakkamense	0	0	0	0	0	0	0	0	0	0	0	0	0	0	0	0	0	0	0	0
DD	Arthropods	2008		Isolapotamon mindanaoense	0	0	0	0	0	0	0	0	0	0	0	0	0	0	0	0	0	0	0	0
DD	Arthropods	2008		Isolapotamon naiadis	0	0	0	0	0	0	0	0	0	0	0	0	0	0	0	0	0	0	0	0
DD	Arthropods	2008		Isolapotamon sinuatifrons	0	0	0	0	0	0	0	0	0	0	0	0	0	0	0	0	0	0	0	0
DD	Arthropods	2008		Isolapotamon spatha	0	0	0	0	0	0	0	0	0	0	0	0	0	0	0	0	0	0	0	0
DD	Arthropods	2008		Isolapotamon stuebingi	0	0	0	0	0	0	0	0	0	0	0	0	0	0	0	0	0	0	0	0
DD	Arthropods	2008		Johora aipooae	0	0	0	0	0	0	0	0	0	0	0	0	0	0	0	0	0	0	0	0
DD	Arthropods	2006		Junix elumbis	0	0	0	0	0	0	0	0	0	0	0	0	0	0	0	0	0	0	0	0
DD	Arthropods	2008		Kanpotamon duangkhaei	0	0	0	0	0	0	0	0	0	0	0	0	0	0	0	0	0	0	0	0
DD	Arthropods	2008		Kanpotamon simulum	0	0	0	0	0	0	0	0	0	0	0	0	0	0	0	0	0	0	0	0
DD	Arthropods	2008		Kingsleya besti	0	0	0	0	0	0	0	0	0	0	0	0	0	0	0	0	0	0	0	0
DD	Arthropods	2008		Kukrimon cucphuongense	0	0	0	0	0	0	0	0	0	0	0	0	0	0	0	0	0	0	0	0
DD	Arthropods	2008		Lacunipotamon albusorbitum	0	0	0	0	0	0	0	0	0	0	0	0	0	0	0	0	0	0	0	0
DD	Arthropods	2008		Laevimon tankiense	0	0	0	0	0	0	0	0	0	0	0	0	0	0	0	0	0	0	0	0
DD	Arthropods	2009		Lamelligomphus laetus	1	0	0	0	0	0	0	0	0	0	0	0	0	0	1	0	0	0	0	0
DD	Arthropods	2008		Larnaudia beusekomae	0	0	0	0	0	0	0	0	0	0	0	0	0	0	0	0	0	0	0	0
DD	Arthropods	2008		Larnaudia larnaudii	1	0	0	0	0	0	0	0	0	0	0	0	1	0	0	0	0	0	0	0
DD	Arthropods	2006		Lathrocordulia garrisoni	0	0	0	0	0	0	0	0	0	0	0	0	0	0	0	0	0	0	0	0
DD	Arthropods	2008		Latopotamon obtortum	0	0	0	0	0	0	0	0	0	0	0	0	0	0	0	0	0	0	0	0
DD	Arthropods	2009		Leptagrion acutum	0	0	0	0	0	0	0	0	0	0	0	0	0	0	0	0	0	0	0	0
DD	Arthropods	2009		Leptagrion croceum	0	0	0	0	0	0	0	0	0	0	0	0	0	0	0	0	0	0	0	0
DD	Arthropods	2010		Leptogomphus inclitus	0	0	0	0	0	0	0	0	0	0	0	0	0	0	0	0	0	0	0	0
DD	Arthropods	2009		Leptogomphus intermedius	0	0	0	0	0	0	0	0	0	0	0	0	0	0	0	0	0	0	0	0
DD	Arthropods	2009		Leptogomphus pasia	0	0	0	0	0	0	0	0	0	0	0	0	0	0	0	0	0	0	0	0
DD	Arthropods	2009		Lestes debellardi	0	0	0	0	0	0	0	0	0	0	0	0	0	0	0	0	0	0	0	0
DD	Arthropods	2009		Lestes garoensis	0	0	0	0	0	0	0	0	0	0	0	0	0	0	0	0	0	0	0	0
DD	Arthropods	2010		Lestes malaisei	0	0	0	0	0	0	0	0	0	0	0	0	0	0	0	0	0	0	0	0
DD	Arthropods	2010		Lestes nigriceps	0	0	0	0	0	0	0	0	0	0	0	0	0	0	0	0	0	0	0	0
DD	Arthropods	2009		Lestes silvaticus	0	0	0	0	0	0	0	0	0	0	0	0	0	0	0	0	0	0	0	0
DD	Arthropods	2009		Lestes umbrinus	0	0	0	0	0	0	0	0	0	0	0	0	0	0	0	0	0	0	0	0
DD	Arthropods	2009		Lestes urubamba	0	0	0	0	0	0	0	0	0	0	0	0	0	0	0	0	0	0	0	0
DD	Arthropods	2009		Lestinogomphus africanus	0	0	0	0	0	0	0	0	0	0	0	0	0	0	0	0	0	0	0	0
DD	Arthropods	2010		Lestinogomphus bivittatus	0	0	0	0	0	0	0	0	0	0	0	0	0	0	0	0	0	0	0	0
DD	Arthropods	2009		Lestinogomphus minutus	0	0	0	0	0	0	0	0	0	0	0	0	0	0	0	0	0	0	0	0
DD	Arthropods	2009		Leucorrhinia circassica	0	0	0	0	0	0	0	0	0	0	0	0	0	0	0	0	0	0	0	0
DD	Arthropods	2006		Libellulosoma minuta	1	0	0	0	0	0	0	0	0	0	0	0	0	0	0	0	0	0	1	0
DD	Arthropods	2006		Libyogomphus bwambae	0	0	0	0	0	0	0	0	0	0	0	0	0	0	0	0	0	0	0	0
DD	Arthropods	2009		Libyogomphus christinae	0	0	0	0	0	0	0	0	0	0	0	0	0	0	0	0	0	0	0	0
DD	Arthropods	2009		Libyogomphus emiliae	0	0	0	0	0	0	0	0	0	0	0	0	0	0	0	0	0	0	0	0
DD	Arthropods	2009		Libyogomphus mamfei	0	0	0	0	0	0	0	0	0	0	0	0	0	0	0	0	0	0	0	0
DD	Arthropods	2009		Lieftinckia ramosa	0	0	0	0	0	0	0	0	0	0	0	0	0	0	0	0	0	0	0	0
DD	Arthropods	2009		Linaeschna polli	1	0	0	0	0	0	0	1	0	0	0	0	0	0	0	0	0	0	0	0
DD	Arthropods	2008		Lindacatalina brevipenis	0	0	0	0	0	0	0	0	0	0	0	0	0	0	0	0	0	0	0	0
DD	Arthropods	2008		Lindacatalina hauserae	0	0	0	0	0	0	0	0	0	0	0	0	0	0	0	0	0	0	0	0
DD	Arthropods	2008		Lindacatalina latipenis	0	0	0	0	0	0	0	0	0	0	0	0	0	0	0	0	0	0	0	0
DD	Arthropods	2008		Lindacatalina puyensis	0	0	0	0	0	0	0	0	0	0	0	0	0	0	0	0	0	0	0	0
DD	Arthropods	2010		Lioderina linearis	0	0	0	0	0	0	0	0	0	0	0	0	0	0	0	0	0	0	0	0
DD	Arthropods	2008		Liotelphusa campestris	0	0	0	0	0	0	0	0	0	0	0	0	0	0	0	0	0	0	0	0
DD	Arthropods	2008		Liotelphusa wuermlii	0	0	0	0	0	0	0	0	0	0	0	0	0	0	0	0	0	0	0	0
DD	Arthropods	2008		Lobithelphusa mexicana	0	0	0	0	0	0	0	0	0	0	0	0	0	0	0	0	0	0	0	0
DD	Arthropods	2008		Lobothelphusa barbouri	0	0	0	0	0	0	0	0	0	0	0	0	0	0	0	0	0	0	0	0
DD	Arthropods	2008		Lobothelphusa calva	0	0	0	0	0	0	0	0	0	0	0	0	0	0	0	0	0	0	0	0
DD	Arthropods	2008		Lobothelphusa crenulifera	0	0	0	0	0	0	0	0	0	0	0	0	0	0	0	0	0	0	0	0
DD	Arthropods	2008		Lobothelphusa floccosa	0	0	0	0	0	0	0	0	0	0	0	0	0	0	0	0	0	0	0	0
DD	Arthropods	2009		Lokia modesta	0	0	0	0	0	0	0	0	0	0	0	0	0	0	0	0	0	0	0	0
DD	Arthropods	2008		Lophopotamon yenyuanense	0	0	0	0	0	0	0	0	0	0	0	0	0	0	0	0	0	0	0	0
DD	Arthropods	2009		Lyriothemis acigastra	1	0	0	0	0	0	0	0	0	0	0	0	0	0	1	0	0	0	0	0
DD	Arthropods	2010		Lyriothemis mortoni	0	0	0	0	0	0	0	0	0	0	0	0	0	0	0	0	0	0	0	0
DD	Arthropods	2009		Lyriothemis salva	0	0	0	0	0	0	0	0	0	0	0	0	0	0	0	0	0	0	0	0
DD	Arthropods	2009		Macrogomphus annulatus	0	0	0	0	0	0	0	0	0	0	0	0	0	0	0	0	0	0	0	0
DD	Arthropods	2009		Macrogomphus borikhanensis	0	0	0	0	0	0	0	0	0	0	0	0	0	0	0	0	0	0	0	0
DD	Arthropods	2009		Macrogomphus decemlineatus	0	0	0	0	0	0	0	0	0	0	0	0	0	0	0	0	0	0	0	0
DD	Arthropods	2009		Macrogomphus kerri	0	0	0	0	0	0	0	0	0	0	0	0	0	0	0	0	0	0	0	0
DD	Arthropods	2010		Macrogomphus montanus	0	0	0	0	0	0	0	0	0	0	0	0	0	0	0	0	0	0	0	0
DD	Arthropods	2010		Macrogomphus robustus	0	0	0	0	0	0	0	0	0	0	0	0	0	0	0	0	0	0	0	0
DD	Arthropods	2009		Macrogomphus seductus	0	0	0	0	0	0	0	0	0	0	0	0	0	0	0	0	0	0	0	0
DD	Arthropods	2010		Macromia aculeata	0	0	0	0	0	0	0	0	0	0	0	0	0	0	0	0	0	0	0	0
DD	Arthropods	2010		Macromia flavicincta	0	0	0	0	0	0	0	0	0	0	0	0	0	0	0	0	0	0	0	0
DD	Arthropods	2010		Macromia flavovittata	0	0	0	0	0	0	0	0	0	0	0	0	0	0	0	0	0	0	0	0
DD	Arthropods	2009		Macromia icterica	0	0	0	0	0	0	0	0	0	0	0	0	0	0	0	0	0	0	0	0
DD	Arthropods	2009		Macromia macula	0	0	0	0	0	0	0	0	0	0	0	0	0	0	0	0	0	0	0	0
DD	Arthropods	2010		Macromia pallida	0	0	0	0	0	0	0	0	0	0	0	0	0	0	0	0	0	0	0	0
DD	Arthropods	2010		Macromia sombui	0	0	0	0	0	0	0	0	0	0	0	0	0	0	0	0	0	0	0	0
DD	Arthropods	2009		Macromia sophrosyne	0	0	0	0	0	0	0	0	0	0	0	0	0	0	0	0	0	0	0	0
DD	Arthropods	2009		Macromia viridescens	0	0	0	0	0	0	0	0	0	0	0	0	0	0	0	0	0	0	0	0
DD	Arthropods	2009		Macromidia hangzhouensis	0	0	0	0	0	0	0	0	0	0	0	0	0	0	0	0	0	0	0	0
DD	Arthropods	2009		Macrothemis aurimaculata	1	0	0	0	1	0	0	0	0	0	0	0	0	0	0	0	0	0	0	0
DD	Arthropods	2008		Malayopotamon gestroi	0	0	0	0	0	0	0	0	0	0	0	0	0	0	0	0	0	0	0	0
DD	Arthropods	2008		Malayopotamon granulosum	0	0	0	0	0	0	0	0	0	0	0	0	0	0	0	0	0	0	0	0
DD	Arthropods	2008		Malayopotamon javanense	0	0	0	0	0	0	0	0	0	0	0	0	0	0	0	0	0	0	0	0
DD	Arthropods	2008		Malayopotamon similis	0	0	0	0	0	0	0	0	0	0	0	0	0	0	0	0	0	0	0	0
DD	Arthropods	2008		Malayopotamon sumatrense	0	0	0	0	0	0	0	0	0	0	0	0	0	0	0	0	0	0	0	0
DD	Arthropods	2008		Malayopotamon tobaense	0	0	0	0	0	0	0	0	0	0	0	0	0	0	0	0	0	0	0	0
DD	Arthropods	2009		Malgassophlebia westfalli	0	0	0	0	0	0	0	0	0	0	0	0	0	0	0	0	0	0	0	0
DD	Arthropods	2008		Martiana clausa	0	0	0	0	0	0	0	0	0	0	0	0	0	0	0	0	0	0	0	0
DD	Arthropods	2008		Maydelliathelphusa falcidigitis	0	0	0	0	0	0	0	0	0	0	0	0	0	0	0	0	0	0	0	0
DD	Arthropods	2006		Mecistogaster amalia	1	0	0	0	0	0	0	0	0	0	0	0	0	0	0	1	0	0	0	0
DD	Arthropods	2008		Mediapotamon angustipedum	0	0	0	0	0	0	0	0	0	0	0	0	0	0	0	0	0	0	0	0
DD	Arthropods	2010		Megalestes irma	0	0	0	0	0	0	0	0	0	0	0	0	0	0	0	0	0	0	0	0
DD	Arthropods	2009		Megalestes lieftincki	0	0	0	0	0	0	0	0	0	0	0	0	0	0	0	0	0	0	0	0
DD	Arthropods	2009		Megalestes raychoudhurii	0	0	0	0	0	0	0	0	0	0	0	0	0	0	0	0	0	0	0	0
DD	Arthropods	2010		Megalogomphus bicornutus	0	0	0	0	0	0	0	0	0	0	0	0	0	0	0	0	0	0	0	0
DD	Arthropods	2009		Megalogomphus flavicolor	0	0	0	0	0	0	0	0	0	0	0	0	0	0	0	0	0	0	0	0
DD	Arthropods	2009		Megalogomphus icterops	0	0	0	0	0	0	0	0	0	0	0	0	0	0	0	0	0	0	0	0
DD	Arthropods	2010		Megalogomphus smithii	0	0	0	0	0	0	0	0	0	0	0	0	0	0	0	0	0	0	0	0
DD	Arthropods	2009		Megalogomphus superbus	0	0	0	0	0	0	0	0	0	0	0	0	0	0	0	0	0	0	0	0
DD	Arthropods	2008		Mekhongthelphusa neisi	0	0	0	0	0	0	0	0	0	0	0	0	0	0	0	0	0	0	0	0
DD	Arthropods	2009		Melanesobasis maculosa	0	0	0	0	0	0	0	0	0	0	0	0	0	0	0	0	0	0	0	0
DD	Arthropods	2009		Melligomphus cataractus	0	0	0	0	0	0	0	0	0	0	0	0	0	0	0	0	0	0	0	0
DD	Arthropods	2009		Melligomphus dolus	0	0	0	0	0	0	0	0	0	0	0	0	0	0	0	0	0	0	0	0
DD	Arthropods	2008		Melocarcinus meekei	1	0	0	0	0	0	0	0	0	0	0	0	0	0	0	0	0	0	1	0
DD	Arthropods	2009		Metacnemis secundaris	0	0	0	0	0	0	0	0	0	0	0	0	0	0	0	0	0	0	0	0
DD	Arthropods	2009		Metaleptobasis bicornis	0	0	0	0	0	0	0	0	0	0	0	0	0	0	0	0	0	0	0	0
DD	Arthropods	2009		Metaleptobasis tetragena	0	0	0	0	0	0	0	0	0	0	0	0	0	0	0	0	0	0	0	0
DD	Arthropods	2009		Micrathyria duplicata	0	0	0	0	0	0	0	0	0	0	0	0	0	0	0	0	0	0	0	0
DD	Arthropods	2009		Microgomphus lilliputians	0	0	0	0	0	0	0	0	0	0	0	0	0	0	0	0	0	0	0	0
DD	Arthropods	2010		Microgomphus loogali	0	0	0	0	0	0	0	0	0	0	0	0	0	0	0	0	0	0	0	0
DD	Arthropods	2009		Microgomphus torquatus	0	0	0	0	0	0	0	0	0	0	0	0	0	0	0	0	0	0	0	0
DD	Arthropods	2009		Microgomphus verticalis	0	0	0	0	0	0	0	0	0	0	0	0	0	0	0	0	0	0	0	0
DD	Arthropods	2006		Micromacromia flava	0	0	0	0	0	0	0	0	0	0	0	0	0	0	0	0	0	0	0	0
DD	Arthropods	2010		Microrhagus hummleri	0	0	0	0	0	0	0	0	0	0	0	0	0	0	0	0	0	0	0	0
DD	Arthropods	2008		Microthelphusa barinensis	0	0	0	0	0	0	0	0	0	0	0	0	0	0	0	0	0	0	0	0
DD	Arthropods	2008		Microthelphusa bolivari	0	0	0	0	0	0	0	0	0	0	0	0	0	0	0	0	0	0	0	0
DD	Arthropods	2008		Microthelphusa ginesi	0	0	0	0	0	0	0	0	0	0	0	0	0	0	0	0	0	0	0	0
DD	Arthropods	2008		Microthelphusa odaelkae	1	0	0	0	0	0	0	0	1	0	0	0	0	0	0	0	0	0	0	0
DD	Arthropods	2008		Microthelphusa racenisi	0	0	0	0	0	0	0	0	0	0	0	0	0	0	0	0	0	0	0	0
DD	Arthropods	2008		Microthelphusa rodriguezi	1	0	0	0	0	0	0	0	0	0	0	1	0	0	0	0	0	0	0	0
DD	Arthropods	2008		Microthelphusa somanni	0	0	0	0	0	0	0	0	0	0	0	0	0	0	0	0	0	0	0	0
DD	Arthropods	2008		Microthelphusa turumikiri	0	0	0	0	0	0	0	0	0	0	0	0	0	0	0	0	0	0	0	0
DD	Arthropods	2008		Microthelphusa wymani	0	0	0	0	0	0	0	0	0	0	0	0	0	0	0	0	0	0	0	0
DD	Arthropods	2008		Mindoron balssi	0	0	0	0	0	0	0	0	0	0	0	0	0	0	0	0	0	0	0	0
DD	Arthropods	2008		Mindoron pala	0	0	0	0	0	0	0	0	0	0	0	0	0	0	0	0	0	0	0	0
DD	Arthropods	2008		Minpotamon nasicum	0	0	0	0	0	0	0	0	0	0	0	0	0	0	0	0	0	0	0	0
DD	Arthropods	2009		Mitragomphus ganzanus	0	0	0	0	0	0	0	0	0	0	0	0	0	0	0	0	0	0	0	0
DD	Arthropods	2009		Mnesarete smaragdina	0	0	0	0	0	0	0	0	0	0	0	0	0	0	0	0	0	0	0	0
DD	Arthropods	2008		Moritschus narinnensis	0	0	0	0	0	0	0	0	0	0	0	0	0	0	0	0	0	0	0	0
DD	Arthropods	2009		Mortonagrion alcyone	0	0	0	0	0	0	0	0	0	0	0	0	0	0	0	0	0	0	0	0
DD	Arthropods	2009		Mortonagrion appendiculatum	0	0	0	0	0	0	0	0	0	0	0	0	0	0	0	0	0	0	0	0
DD	Arthropods	2009		Mortonagrion ceylonicum	1	0	0	0	0	0	0	0	0	0	0	0	0	0	0	0	1	0	0	0
DD	Arthropods	2009		Mortonagrion varralli	1	0	0	0	0	0	0	0	0	0	0	0	0	0	0	0	0	0	1	0
DD	Arthropods	2010		Mycetophagus tauricus	0	0	0	0	0	0	0	0	0	0	0	0	0	0	0	0	0	0	0	0
DD	Arthropods	2009		Nannophlebia agalma	0	0	0	0	0	0	0	0	0	0	0	0	0	0	0	0	0	0	0	0
DD	Arthropods	2009		Nannophlebia amaryllis	0	0	0	0	0	0	0	0	0	0	0	0	0	0	0	0	0	0	0	0
DD	Arthropods	2009		Nannophlebia buruensis	0	0	0	0	0	0	0	0	0	0	0	0	0	0	0	0	0	0	0	0
DD	Arthropods	2009		Navicordulia amazonica	0	0	0	0	0	0	0	0	0	0	0	0	0	0	0	0	0	0	0	0
DD	Arthropods	2009		Navicordulia atlantica	0	0	0	0	0	0	0	0	0	0	0	0	0	0	0	0	0	0	0	0
DD	Arthropods	2010		Neallogaster schmidti	0	0	0	0	0	0	0	0	0	0	0	0	0	0	0	0	0	0	0	0
DD	Arthropods	2008		Neilupotamon papilionaceum	0	0	0	0	0	0	0	0	0	0	0	0	0	0	0	0	0	0	0	0
DD	Arthropods	2008		Neilupotamon sinense	0	0	0	0	0	0	0	0	0	0	0	0	0	0	0	0	0	0	0	0
DD	Arthropods	2009		Neocordulia griphus	0	0	0	0	0	0	0	0	0	0	0	0	0	0	0	0	0	0	0	0
DD	Arthropods	2009		Neocordulia volxemi	0	0	0	0	0	0	0	0	0	0	0	0	0	0	0	0	0	0	0	0
DD	Arthropods	2009		Neodythemis arnoulti	0	0	0	0	0	0	0	0	0	0	0	0	0	0	0	0	0	0	0	0
DD	Arthropods	2007		Neodythemis fitzgeraldi	0	0	0	0	0	0	0	0	0	0	0	0	0	0	0	0	0	0	0	0
DD	Arthropods	2008		Neolarnaudia botti	0	0	0	0	0	0	0	0	0	0	0	0	0	0	0	0	0	0	0	0
DD	Arthropods	2008		Neolarnaudia phymatodes	0	0	0	0	0	0	0	0	0	0	0	0	0	0	0	0	0	0	0	0
DD	Arthropods	2006		Neoneura carnatica	0	0	0	0	0	0	0	0	0	0	0	0	0	0	0	0	0	0	0	0
DD	Arthropods	2006		Neoneura maria	0	0	0	0	0	0	0	0	0	0	0	0	0	0	0	0	0	0	0	0
DD	Arthropods	2006		Neopetalia punctata	0	0	0	0	0	0	0	0	0	0	0	0	0	0	0	0	0	0	0	0
DD	Arthropods	2008		Neostrengeria aspera	0	0	0	0	0	0	0	0	0	0	0	0	0	0	0	0	0	0	0	0
DD	Arthropods	2008		Neostrengeria libradensis	0	0	0	0	0	0	0	0	0	0	0	0	0	0	0	0	0	0	0	0
DD	Arthropods	2008		Neostrengeria lobulata	0	0	0	0	0	0	0	0	0	0	0	0	0	0	0	0	0	0	0	0
DD	Arthropods	2008		Neostrengeria macarenae	0	0	0	0	0	0	0	0	0	0	0	0	0	0	0	0	0	0	0	0
DD	Arthropods	2008		Neostrengeria sketi	0	0	0	0	0	0	0	0	0	0	0	0	0	0	0	0	0	0	0	0
DD	Arthropods	2008		Neotiwaripotamon jianfengense	0	0	0	0	0	0	0	0	0	0	0	0	0	0	0	0	0	0	0	0
DD	Arthropods	2008		Neotiwaripotamon whiteheadi	0	0	0	0	0	0	0	0	0	0	0	0	0	0	0	0	0	0	0	0
DD	Arthropods	2009		Nesobasis rufostigma	0	0	0	0	0	0	0	0	0	0	0	0	0	0	0	0	0	0	0	0
DD	Arthropods	2009		Nesocordulia malgassica	0	0	0	0	0	0	0	0	0	0	0	0	0	0	0	0	0	0	0	0
DD	Arthropods	2006		Nesocordulia villiersi	0	0	0	0	0	0	0	0	0	0	0	0	0	0	0	0	0	0	0	0
DD	Arthropods	2009		Nesolestes drocera	0	0	0	0	0	0	0	0	0	0	0	0	0	0	0	0	0	0	0	0
DD	Arthropods	2009		Nesolestes mariae	0	0	0	0	0	0	0	0	0	0	0	0	0	0	0	0	0	0	0	0
DD	Arthropods	2009		Nesolestes martini	0	0	0	0	0	0	0	0	0	0	0	0	0	0	0	0	0	0	0	0
DD	Arthropods	2006		Nesolestes pauliani	0	0	0	0	0	0	0	0	0	0	0	0	0	0	0	0	0	0	0	0
DD	Arthropods	2009		Nesolestes ranavalona	0	0	0	0	0	0	0	0	0	0	0	0	0	0	0	0	0	0	0	0
DD	Arthropods	2009		Nesolestes tuberculicollis	0	0	0	0	0	0	0	0	0	0	0	0	0	0	0	0	0	0	0	0
DD	Arthropods	2009		Neuraeschna cornuta	0	0	0	0	0	0	0	0	0	0	0	0	0	0	0	0	0	0	0	0
DD	Arthropods	2009		Neuraeschna mayoruna	0	0	0	0	0	0	0	0	0	0	0	0	0	0	0	0	0	0	0	0
DD	Arthropods	2009		Neuraeschna mina	0	0	0	0	0	0	0	0	0	0	0	0	0	0	0	0	0	0	0	0
DD	Arthropods	2010		Neurogomphus agilis	0	0	0	0	0	0	0	0	0	0	0	0	0	0	0	0	0	0	0	0
DD	Arthropods	2009		Neurogomphus angustisigna	0	0	0	0	0	0	0	0	0	0	0	0	0	0	0	0	0	0	0	0
DD	Arthropods	2006		Neurogomphus pinheyi	0	0	0	0	0	0	0	0	0	0	0	0	0	0	0	0	0	0	0	0
DD	Arthropods	2009		Neurogomphus vicinus	0	0	0	0	0	0	0	0	0	0	0	0	0	0	0	0	0	0	0	0
DD	Arthropods	2009		Neurothemis nesaea	0	0	0	0	0	0	0	0	0	0	0	0	0	0	0	0	0	0	0	0
DD	Arthropods	2009		Nihonogomphus indicus	1	0	0	0	0	0	0	0	0	0	0	0	0	0	1	0	0	0	0	0
DD	Arthropods	2009		Nihonogomphus montanus	0	0	0	0	0	0	0	0	0	0	0	0	0	0	0	0	0	0	0	0
DD	Arthropods	2010		Nihonogomphus pulcherrimus	0	0	0	0	0	0	0	0	0	0	0	0	0	0	0	0	0	0	0	0
DD	Arthropods	2009		Nihonogomphus semanticus	0	0	0	0	0	0	0	0	0	0	0	0	0	0	0	0	0	0	0	0
DD	Arthropods	2009		Nihonogomphus shaowuensis	0	0	0	0	0	0	0	0	0	0	0	0	0	0	0	0	0	0	0	0
DD	Arthropods	2009		Noguchiphaea yoshikoae	0	0	0	0	0	0	0	0	0	0	0	0	0	0	0	0	0	0	0	0
DD	Arthropods	2009		Nososticta evelynae	0	0	0	0	0	0	0	0	0	0	0	0	0	0	0	0	0	0	0	0
DD	Arthropods	2009		Nososticta finisterra	0	0	0	0	0	0	0	0	0	0	0	0	0	0	0	0	0	0	0	0
DD	Arthropods	2009		Nososticta kalumburu	0	0	0	0	0	0	0	0	0	0	0	0	0	0	0	0	0	0	0	0
DD	Arthropods	2009		Nososticta koolpinyah	0	0	0	0	0	0	0	0	0	0	0	0	0	0	0	0	0	0	0	0
DD	Arthropods	2009		Nososticta nigrifrons	0	0	0	0	0	0	0	0	0	0	0	0	0	0	0	0	0	0	0	0
DD	Arthropods	2009		Nososticta wallacii	0	0	0	0	0	0	0	0	0	0	0	0	0	0	0	0	0	0	0	0
DD	Arthropods	2006		Nothodiplax dendrophila	0	0	0	0	0	0	0	0	0	0	0	0	0	0	0	0	0	0	0	0
DD	Arthropods	2006		Notogomphus flavifrons	0	0	0	0	0	0	0	0	0	0	0	0	0	0	0	0	0	0	0	0
DD	Arthropods	2008		Odontothelphusa lacandona	0	0	0	0	0	0	0	0	0	0	0	0	0	0	0	0	0	0	0	0
DD	Arthropods	2008		Odontothelphusa lacanjaensis	0	0	0	0	0	0	0	0	0	0	0	0	0	0	0	0	0	0	0	0
DD	Arthropods	2008		Odontothelphusa monodontis	0	0	0	0	0	0	0	0	0	0	0	0	0	0	0	0	0	0	0	0
DD	Arthropods	2008		Odontothelphusa palenquensis	0	0	0	0	0	0	0	0	0	0	0	0	0	0	0	0	0	0	0	0
DD	Arthropods	2008		Odontothelphusa toninae	0	0	0	0	0	0	0	0	0	0	0	0	0	0	0	0	0	0	0	0
DD	Arthropods	2008		Oedothelphusa orientalis	0	0	0	0	0	0	0	0	0	0	0	0	0	0	0	0	0	0	0	0
DD	Arthropods	2009		Oligoaeschna decorata	0	0	0	0	0	0	0	0	0	0	0	0	0	0	0	0	0	0	0	0
DD	Arthropods	2009		Oligoaeschna elacatura	0	0	0	0	0	0	0	0	0	0	0	0	0	0	0	0	0	0	0	0
DD	Arthropods	2009		Oligoaeschna khasiana	0	0	0	0	0	0	0	0	0	0	0	0	0	0	0	0	0	0	0	0
DD	Arthropods	2009		Oligoaeschna martini	0	0	0	0	0	0	0	0	0	0	0	0	0	0	0	0	0	0	0	0
DD	Arthropods	2009		Oligoaeschna sumatrana	0	0	0	0	0	0	0	0	0	0	0	0	0	0	0	0	0	0	0	0
DD	Arthropods	2009		Oligoclada xanthopleura	0	0	0	0	0	0	0	0	0	0	0	0	0	0	0	0	0	0	0	0
DD	Arthropods	2004		Omiodes asaphombra	0	0	0	0	0	0	0	0	0	0	0	0	0	0	0	0	0	0	0	0
DD	Arthropods	2004		Omiodes continuatalis	4	0	0	0	0	0	0	0	0	0	0	0	0	1	1	1	0	0	1	0
DD	Arthropods	2004		Omiodes epicentra	0	0	0	0	0	0	0	0	0	0	0	0	0	0	0	0	0	0	0	0
DD	Arthropods	2004		Omiodes euryprora	0	0	0	0	0	0	0	0	0	0	0	0	0	0	0	0	0	0	0	0
DD	Arthropods	2004		Omiodes fullawayi	0	0	0	0	0	0	0	0	0	0	0	0	0	0	0	0	0	0	0	0
DD	Arthropods	2004		Omiodes laysanensis	0	0	0	0	0	0	0	0	0	0	0	0	0	0	0	0	0	0	0	0
DD	Arthropods	2004		Omiodes meyricki	0	0	0	0	0	0	0	0	0	0	0	0	0	0	0	0	0	0	0	0
DD	Arthropods	2004		Omiodes musicola	0	0	0	0	0	0	0	0	0	0	0	0	0	0	0	0	0	0	0	0
DD	Arthropods	2004		Omiodes telegrapha	0	0	0	0	0	0	0	0	0	0	0	0	0	0	0	0	0	0	0	0
DD	Arthropods	2009		Onychogomphus acinaces	0	0	0	0	0	0	0	0	0	0	0	0	0	0	0	0	0	0	0	0
DD	Arthropods	2010		Onychogomphus annularis	0	0	0	0	0	0	0	0	0	0	0	0	0	0	0	0	0	0	0	0
DD	Arthropods	2009		Onychogomphus banteng	0	0	0	0	0	0	0	0	0	0	0	0	0	0	0	0	0	0	0	0
DD	Arthropods	2009		Onychogomphus cacharicus	0	0	0	0	0	0	0	0	0	0	0	0	0	0	0	0	0	0	0	0
DD	Arthropods	2009		Onychogomphus castor	0	0	0	0	0	0	0	0	0	0	0	0	0	0	0	0	0	0	0	0
DD	Arthropods	2010		Onychogomphus cerastis	0	0	0	0	0	0	0	0	0	0	0	0	0	0	0	0	0	0	0	0
DD	Arthropods	2009		Onychogomphus geometricus	0	0	0	0	0	0	0	0	0	0	0	0	0	0	0	0	0	0	0	0
DD	Arthropods	2009		Onychogomphus grammicus	0	0	0	0	0	0	0	0	0	0	0	0	0	0	0	0	0	0	0	0
DD	Arthropods	2009		Onychogomphus kerri	0	0	0	0	0	0	0	0	0	0	0	0	0	0	0	0	0	0	0	0
DD	Arthropods	2006		Onychogomphus kitchingmani	0	0	0	0	0	0	0	0	0	0	0	0	0	0	0	0	0	0	0	0
DD	Arthropods	2010		Onychogomphus maclachlani	0	0	0	0	0	0	0	0	0	0	0	0	0	0	0	0	0	0	0	0
DD	Arthropods	2010		Onychogomphus maculivertex	0	0	0	0	0	0	0	0	0	0	0	0	0	0	0	0	0	0	0	0
DD	Arthropods	2010		Onychogomphus meghalayanus	0	0	0	0	0	0	0	0	0	0	0	0	0	0	0	0	0	0	0	0
DD	Arthropods	2010		Onychogomphus nigrotibialis	0	0	0	0	0	0	0	0	0	0	0	0	0	0	0	0	0	0	0	0
DD	Arthropods	2006		Onychogomphus pilosus	0	0	0	0	0	0	0	0	0	0	0	0	0	0	0	0	0	0	0	0
DD	Arthropods	2009		Onychogomphus rappardi	0	0	0	0	0	0	0	0	0	0	0	0	0	0	0	0	0	0	0	0
DD	Arthropods	2010		Onychogomphus risi	0	0	0	0	0	0	0	0	0	0	0	0	0	0	0	0	0	0	0	0
DD	Arthropods	2007		Onychogomphus rossii	0	0	0	0	0	0	0	0	0	0	0	0	0	0	0	0	0	0	0	0
DD	Arthropods	2009		Onychogomphus saundersii	0	0	0	0	0	0	0	0	0	0	0	0	0	0	0	0	0	0	0	0
DD	Arthropods	2009		Onychogomphus striatus	0	0	0	0	0	0	0	0	0	0	0	0	0	0	0	0	0	0	0	0
DD	Arthropods	2010		Orconectes hobbsi	0	0	0	0	0	0	0	0	0	0	0	0	0	0	0	0	0	0	0	0
DD	Arthropods	2010		Orconectes holti	1	0	0	0	0	0	0	0	0	1	0	0	0	0	0	0	0	0	0	0
DD	Arthropods	2010		Orconectes jonesi	0	0	0	0	0	0	0	0	0	0	0	0	0	0	0	0	0	0	0	0
DD	Arthropods	2010		Orconectes maletae	0	0	0	0	0	0	0	0	0	0	0	0	0	0	0	0	0	0	0	0
DD	Arthropods	2010		Orconectes mississippiensis	0	0	0	0	0	0	0	0	0	0	0	0	0	0	0	0	0	0	0	0
DD	Arthropods	2010		Orconectes virginiensis	0	0	0	0	0	0	0	0	0	0	0	0	0	0	0	0	0	0	0	0
DD	Arthropods	2009		Orientogomphus circularis	0	0	0	0	0	0	0	0	0	0	0	0	0	0	0	0	0	0	0	0
DD	Arthropods	2010		Orientogomphus earnshawi	0	0	0	0	0	0	0	0	0	0	0	0	0	0	0	0	0	0	0	0
DD	Arthropods	2009		Ormenophlebia regina	0	0	0	0	0	0	0	0	0	0	0	0	0	0	0	0	0	0	0	0
DD	Arthropods	2009		Orolestes durga	0	0	0	0	0	0	0	0	0	0	0	0	0	0	0	0	0	0	0	0
DD	Arthropods	2009		Orthetrum borneense	0	0	0	0	0	0	0	0	0	0	0	0	0	0	0	0	0	0	0	0
DD	Arthropods	2009		Orthetrum sagitta	0	0	0	0	0	0	0	0	0	0	0	0	0	0	0	0	0	0	0	0
DD	Arthropods	2008		Orthothelphusa roberti	0	0	0	0	0	0	0	0	0	0	0	0	0	0	0	0	0	0	0	0
DD	Arthropods	2008		Ovitamon arcanum	0	0	0	0	0	0	0	0	0	0	0	0	0	0	0	0	0	0	0	0
DD	Arthropods	2008		Ovitamon cumingii	0	0	0	0	0	0	0	0	0	0	0	0	0	0	0	0	0	0	0	0
DD	Arthropods	2008		Ovitamon tomaculum	0	0	0	0	0	0	0	0	0	0	0	0	0	0	0	0	0	0	0	0
DD	Arthropods	2008		Oziothelphusa aurantia	0	0	0	0	0	0	0	0	0	0	0	0	0	0	0	0	0	0	0	0
DD	Arthropods	2008		Oziothelphusa bouvieri	0	0	0	0	0	0	0	0	0	0	0	0	0	0	0	0	0	0	0	0
DD	Arthropods	2010		Pacifastacus connectens	0	0	0	0	0	0	0	0	0	0	0	0	0	0	0	0	0	0	0	0
DD	Arthropods	2009		Pacificagrion dolorosa	0	0	0	0	0	0	0	0	0	0	0	0	0	0	0	0	0	0	0	0
DD	Arthropods	2009		Palaemnema bilobulata	0	0	0	0	0	0	0	0	0	0	0	0	0	0	0	0	0	0	0	0
DD	Arthropods	2009		Palaemnema brucei	0	0	0	0	0	0	0	0	0	0	0	0	0	0	0	0	0	0	0	0
DD	Arthropods	2009		Palaemnema carmelita	0	0	0	0	0	0	0	0	0	0	0	0	0	0	0	0	0	0	0	0
DD	Arthropods	2009		Palaemnema cyclohamulata	0	0	0	0	0	0	0	0	0	0	0	0	0	0	0	0	0	0	0	0
DD	Arthropods	2009		Palaemnema lorena	0	0	0	0	0	0	0	0	0	0	0	0	0	0	0	0	0	0	0	0
DD	Arthropods	2009		Palaemnema picicaudata	0	0	0	0	0	0	0	0	0	0	0	0	0	0	0	0	0	0	0	0
DD	Arthropods	2009		Palaemnema spinulata	0	0	0	0	0	0	0	0	0	0	0	0	0	0	0	0	0	0	0	0
DD	Arthropods	2009		Palaiargia eclecta	0	0	0	0	0	0	0	0	0	0	0	0	0	0	0	0	0	0	0	0
DD	Arthropods	2009		Palaiargia eos	0	0	0	0	0	0	0	0	0	0	0	0	0	0	0	0	0	0	0	0
DD	Arthropods	2009		Palaiargia halcyon	0	0	0	0	0	0	0	0	0	0	0	0	0	0	0	0	0	0	0	0
DD	Arthropods	2009		Palaiargia optata	0	0	0	0	0	0	0	0	0	0	0	0	0	0	0	0	0	0	0	0
DD	Arthropods	2009		Palaiargia tanysiptera	0	0	0	0	0	0	0	0	0	0	0	0	0	0	0	0	0	0	0	0
DD	Arthropods	2009		Paltothemis cyanosoma	0	0	0	0	0	0	0	0	0	0	0	0	0	0	0	0	0	0	0	0
DD	Arthropods	2009		Papuagrion ekari	0	0	0	0	0	0	0	0	0	0	0	0	0	0	0	0	0	0	0	0
DD	Arthropods	2009		Papuagrion oppositum	0	0	0	0	0	0	0	0	0	0	0	0	0	0	0	0	0	0	0	0
DD	Arthropods	2009		Papuagrion reductum	0	0	0	0	0	0	0	0	0	0	0	0	0	0	0	0	0	0	0	0
DD	Arthropods	2009		Papuargia stueberi	0	0	0	0	0	0	0	0	0	0	0	0	0	0	0	0	0	0	0	0
DD	Arthropods	2009		Paragomphus aureatus	0	0	0	0	0	0	0	0	0	0	0	0	0	0	0	0	0	0	0	0
DD	Arthropods	2009		Paragomphus echinoccipitalis	0	0	0	0	0	0	0	0	0	0	0	0	0	0	0	0	0	0	0	0
DD	Arthropods	2010		Paragomphus frontalis	0	0	0	0	0	0	0	0	0	0	0	0	0	0	0	0	0	0	0	0
DD	Arthropods	2009		Paragomphus hoffmanni	0	0	0	0	0	0	0	0	0	0	0	0	0	0	0	0	0	0	0	0
DD	Arthropods	2010		Paragomphus interruptus	0	0	0	0	0	0	0	0	0	0	0	0	0	0	0	0	0	0	0	0
DD	Arthropods	2009		Paragomphus kiautai	0	0	0	0	0	0	0	0	0	0	0	0	0	0	0	0	0	0	0	0
DD	Arthropods	2010		Paragomphus lindgreni	0	0	0	0	0	0	0	0	0	0	0	0	0	0	0	0	0	0	0	0
DD	Arthropods	2010		Paragomphus machadoi	0	0	0	0	0	0	0	0	0	0	0	0	0	0	0	0	0	0	0	0
DD	Arthropods	2010		Paragomphus maynei	0	0	0	0	0	0	0	0	0	0	0	0	0	0	0	0	0	0	0	0
DD	Arthropods	2010		Paragomphus risi	0	0	0	0	0	0	0	0	0	0	0	0	0	0	0	0	0	0	0	0
DD	Arthropods	2009		Paragomphus tournieri	0	0	0	0	0	0	0	0	0	0	0	0	0	0	0	0	0	0	0	0
DD	Arthropods	2006		Paragomphus zambeziensis	0	0	0	0	0	0	0	0	0	0	0	0	0	0	0	0	0	0	0	0
DD	Arthropods	2008		Parapotamon hsingyiense	0	0	0	0	0	0	0	0	0	0	0	0	0	0	0	0	0	0	0	0
DD	Arthropods	2008		Parapotamonoides endymion	0	0	0	0	0	0	0	0	0	0	0	0	0	0	0	0	0	0	0	0
DD	Arthropods	2008		Pararanguna semilunatum	0	0	0	0	0	0	0	0	0	0	0	0	0	0	0	0	0	0	0	0
DD	Arthropods	2010		Parastacus defossus	8	0	0	0	0	0	0	0	0	0	0	0	0	3	1	2	1	1	0	0
DD	Arthropods	2010		Parastacus laevigatus	0	0	0	0	0	0	0	0	0	0	0	0	0	0	0	0	0	0	0	0
DD	Arthropods	2010		Parastacus nicoleti	0	0	0	0	0	0	0	0	0	0	0	0	0	0	0	0	0	0	0	0
DD	Arthropods	2010		Parastacus pugnax	10	0	0	0	0	0	0	0	0	0	0	0	1	0	0	2	2	2	2	1
DD	Arthropods	2010		Parastacus saffordi	0	0	0	0	0	0	0	0	0	0	0	0	0	0	0	0	0	0	0	0
DD	Arthropods	2010		Parastacus varicosus	4	0	0	0	0	0	1	0	0	0	0	0	1	1	0	1	0	0	0	0
DD	Arthropods	2008		Paratelphusula burmensis	0	0	0	0	0	0	0	0	0	0	0	0	0	0	0	0	0	0	0	0
DD	Arthropods	2008		Paratelphusula dayana	0	0	0	0	0	0	0	0	0	0	0	0	0	0	0	0	0	0	0	0
DD	Arthropods	2008		Paratelphusula peguensis	0	0	0	0	0	0	0	0	0	0	0	0	0	0	0	0	0	0	0	0
DD	Arthropods	2008		Parathelphusa ceophallus	0	0	0	0	0	0	0	0	0	0	0	0	0	0	0	0	0	0	0	0
DD	Arthropods	2008		Parathelphusa convexa	0	0	0	0	0	0	0	0	0	0	0	0	0	0	0	0	0	0	0	0
DD	Arthropods	2008		Parathelphusa linduensis	0	0	0	0	0	0	0	0	0	0	0	0	0	0	0	0	0	0	0	0
DD	Arthropods	2008		Parathelphusa lombokensis	0	0	0	0	0	0	0	0	0	0	0	0	0	0	0	0	0	0	0	0
DD	Arthropods	2008		Parathelphusa mindoro	0	0	0	0	0	0	0	0	0	0	0	0	0	0	0	0	0	0	0	0
DD	Arthropods	2008		Parathelphusa modiglianii	0	0	0	0	0	0	0	0	0	0	0	0	0	0	0	0	0	0	0	0
DD	Arthropods	2008		Parathelphusa nana	0	0	0	0	0	0	0	0	0	0	0	0	0	0	0	0	0	0	0	0
DD	Arthropods	2008		Parathelphusa nitida	0	0	0	0	0	0	0	0	0	0	0	0	0	0	0	0	0	0	0	0
DD	Arthropods	2008		Parathelphusa obtusa	0	0	0	0	0	0	0	0	0	0	0	0	0	0	0	0	0	0	0	0
DD	Arthropods	2008		Parathelphusa palawanensis	0	0	0	0	0	0	0	0	0	0	0	0	0	0	0	0	0	0	0	0
DD	Arthropods	2008		Parathelphusa parma	0	0	0	0	0	0	0	0	0	0	0	0	0	0	0	0	0	0	0	0
DD	Arthropods	2008		Parathelphusa sabari	0	0	0	0	0	0	0	0	0	0	0	0	0	0	0	0	0	0	0	0
DD	Arthropods	2008		Parathelphusa saginata	0	0	0	0	0	0	0	0	0	0	0	0	0	0	0	0	0	0	0	0
DD	Arthropods	2008		Parathelphusa sarawakensis	0	0	0	0	0	0	0	0	0	0	0	0	0	0	0	0	0	0	0	0
DD	Arthropods	2008		Parathelphusa shelfordi	0	0	0	0	0	0	0	0	0	0	0	0	0	0	0	0	0	0	0	0
DD	Arthropods	2008		Parathelphusa tenuipes	0	0	0	0	0	0	0	0	0	0	0	0	0	0	0	0	0	0	0	0
DD	Arthropods	2008		Parathelphusa tridentata	0	0	0	0	0	0	0	0	0	0	0	0	0	0	0	0	0	0	0	0
DD	Arthropods	2008		Parvuspotamon yuxiense	0	0	0	0	0	0	0	0	0	0	0	0	0	0	0	0	0	0	0	0
DD	Arthropods	2010		Pediacus tabellatus	0	0	0	0	0	0	0	0	0	0	0	0	0	0	0	0	0	0	0	0
DD	Arthropods	2010		Periaeschna lebasi	0	0	0	0	0	0	0	0	0	0	0	0	0	0	0	0	0	0	0	0
DD	Arthropods	2009		Periaeschna unifasciata	0	0	0	0	0	0	0	0	0	0	0	0	0	0	0	0	0	0	0	0
DD	Arthropods	2009		Perilestes gracillimus	0	0	0	0	0	0	0	0	0	0	0	0	0	0	0	0	0	0	0	0
DD	Arthropods	2009		Peristicta gauchae	0	0	0	0	0	0	0	0	0	0	0	0	0	0	0	0	0	0	0	0
DD	Arthropods	2009		Peristicta lizeria	0	0	0	0	0	0	0	0	0	0	0	0	0	0	0	0	0	0	0	0
DD	Arthropods	2008		Perithelphusa buettikoferi	0	0	0	0	0	0	0	0	0	0	0	0	0	0	0	0	0	0	0	0
DD	Arthropods	2008		Perithelphusa rouxi	0	0	0	0	0	0	0	0	0	0	0	0	0	0	0	0	0	0	0	0
DD	Arthropods	2010		Petaliaeschna fletcheri	0	0	0	0	0	0	0	0	0	0	0	0	0	0	0	0	0	0	0	0
DD	Arthropods	2009		Petaliaeschna lieftincki	0	0	0	0	0	0	0	0	0	0	0	0	0	0	0	0	0	0	0	0
DD	Arthropods	2010		Phaenandrogomphus aureus	0	0	0	0	0	0	0	0	0	0	0	0	0	0	0	0	0	0	0	0
DD	Arthropods	2009		Philogenia boliviana	0	0	0	0	0	0	0	0	0	0	0	0	0	0	0	0	0	0	0	0
DD	Arthropods	2009		Philogenia buenavista	0	0	0	0	0	0	0	0	0	0	0	0	0	0	0	0	0	0	0	0
DD	Arthropods	2009		Philogenia silvarum	0	0	0	0	0	0	0	0	0	0	0	0	0	0	0	0	0	0	0	0
DD	Arthropods	2009		Philogenia sucra	0	0	0	0	0	0	0	0	0	0	0	0	0	0	0	0	0	0	0	0
DD	Arthropods	2009		Philosina buchi	0	0	0	0	0	0	0	0	0	0	0	0	0	0	0	0	0	0	0	0
DD	Arthropods	2008		Phricotelphusa aedes	0	0	0	0	0	0	0	0	0	0	0	0	0	0	0	0	0	0	0	0
DD	Arthropods	2008		Phricotelphusa carinifera	0	0	0	0	0	0	0	0	0	0	0	0	0	0	0	0	0	0	0	0
DD	Arthropods	2008		Phrygiopilus chuacusensis	0	0	0	0	0	0	0	0	0	0	0	0	0	0	0	0	0	0	0	0
DD	Arthropods	2008		Phrygiopilus ibarrai	1	0	0	0	0	0	1	0	0	0	0	0	0	0	0	0	0	0	0	0
DD	Arthropods	2008		Phrygiopilus longipes	0	0	0	0	0	0	0	0	0	0	0	0	0	0	0	0	0	0	0	0
DD	Arthropods	2008		Phrygiopilus strengerae	0	0	0	0	0	0	0	0	0	0	0	0	0	0	0	0	0	0	0	0
DD	Arthropods	2009		Phyllocycla baria	0	0	0	0	0	0	0	0	0	0	0	0	0	0	0	0	0	0	0	0
DD	Arthropods	2009		Phyllocycla gladiata	0	0	0	0	0	0	0	0	0	0	0	0	0	0	0	0	0	0	0	0
DD	Arthropods	2009		Phyllocycla malkini	0	0	0	0	0	0	0	0	0	0	0	0	0	0	0	0	0	0	0	0
DD	Arthropods	2009		Phyllocycla pallida	0	0	0	0	0	0	0	0	0	0	0	0	0	0	0	0	0	0	0	0
DD	Arthropods	2009		Phyllocycla sordida	0	0	0	0	0	0	0	0	0	0	0	0	0	0	0	0	0	0	0	0
DD	Arthropods	2009		Phyllogomphoides indicatrix	0	0	0	0	0	0	0	0	0	0	0	0	0	0	0	0	0	0	0	0
DD	Arthropods	2009		Phyllogomphoides litoralis	1	0	0	0	0	0	1	0	0	0	0	0	0	0	0	0	0	0	0	0
DD	Arthropods	2009		Phyllogomphoides pseudangularis	0	0	0	0	0	0	0	0	0	0	0	0	0	0	0	0	0	0	0	0
DD	Arthropods	2009		Phyllogomphoides pseudoundulatus	0	0	0	0	0	0	0	0	0	0	0	0	0	0	0	0	0	0	0	0
DD	Arthropods	2009		Phyllogomphoides singularis	0	0	0	0	0	0	0	0	0	0	0	0	0	0	0	0	0	0	0	0
DD	Arthropods	2009		Phyllogomphoides suspectus	0	0	0	0	0	0	0	0	0	0	0	0	0	0	0	0	0	0	0	0
DD	Arthropods	2009		Phyllogomphus helenae	0	0	0	0	0	0	0	0	0	0	0	0	0	0	0	0	0	0	0	0
DD	Arthropods	2009		Phyllogomphus occidentalis	0	0	0	0	0	0	0	0	0	0	0	0	0	0	0	0	0	0	0	0
DD	Arthropods	2009		Phyllomacromia girardi	0	0	0	0	0	0	0	0	0	0	0	0	0	0	0	0	0	0	0	0
DD	Arthropods	2009		Phyllomacromia lamottei	0	0	0	0	0	0	0	0	0	0	0	0	0	0	0	0	0	0	0	0
DD	Arthropods	2009		Phyllomacromia legrandi	0	0	0	0	0	0	0	0	0	0	0	0	0	0	0	0	0	0	0	0
DD	Arthropods	2009		Phyllomacromia nigeriensis	0	0	0	0	0	0	0	0	0	0	0	0	0	0	0	0	0	0	0	0
DD	Arthropods	2009		Phyllomacromia occidentalis	0	0	0	0	0	0	0	0	0	0	0	0	0	0	0	0	0	0	0	0
DD	Arthropods	2009		Phyllomacromia villiersi	0	0	0	0	0	0	0	0	0	0	0	0	0	0	0	0	0	0	0	0
DD	Arthropods	2004		Phyllopetalia stictica	0	0	0	0	0	0	0	0	0	0	0	0	0	0	0	0	0	0	0	0
DD	Arthropods	2008		Pilosamon laosense	0	0	0	0	0	0	0	0	0	0	0	0	0	0	0	0	0	0	0	0
DD	Arthropods	2008		Pilosamon palustre	0	0	0	0	0	0	0	0	0	0	0	0	0	0	0	0	0	0	0	0
DD	Arthropods	2010		Pinheyschna moori	0	0	0	0	0	0	0	0	0	0	0	0	0	0	0	0	0	0	0	0
DD	Arthropods	2009		Planaeschna chiengmaiensis	0	0	0	0	0	0	0	0	0	0	0	0	0	0	0	0	0	0	0	0
DD	Arthropods	2009		Planiplax machadoi	0	0	0	0	0	0	0	0	0	0	0	0	0	0	0	0	0	0	0	0
DD	Arthropods	2008		Planumon cochinchinense	0	0	0	0	0	0	0	0	0	0	0	0	0	0	0	0	0	0	0	0
DD	Arthropods	2009		Platycnemis hova	0	0	0	0	0	0	0	0	0	0	0	0	0	0	0	0	0	0	0	0
DD	Arthropods	2009		Platycnemis longiventris	0	0	0	0	0	0	0	0	0	0	0	0	0	0	0	0	0	0	0	0
DD	Arthropods	2009		Platycnemis pseudalatipes	0	0	0	0	0	0	0	0	0	0	0	0	0	0	0	0	0	0	0	0
DD	Arthropods	2010		Platycypha picta	0	0	0	0	0	0	0	0	0	0	0	0	0	0	0	0	0	0	0	0
DD	Arthropods	2010		Platygomphus feae	0	0	0	0	0	0	0	0	0	0	0	0	0	0	0	0	0	0	0	0
DD	Arthropods	2009		Platylestes heterostylus	0	0	0	0	0	0	0	0	0	0	0	0	0	0	0	0	0	0	0	0
DD	Arthropods	2009		Podolestes coomansi	0	0	0	0	0	0	0	0	0	0	0	0	0	0	0	0	0	0	0	0
DD	Arthropods	2009		Podopteryx casuarina	0	0	0	0	0	0	0	0	0	0	0	0	0	0	0	0	0	0	0	0
DD	Arthropods	2010		Polyommatus pljushtchi	0	0	0	0	0	0	0	0	0	0	0	0	0	0	0	0	0	0	0	0
DD	Arthropods	2009		Polythore lamerceda	0	0	0	0	0	0	0	0	0	0	0	0	0	0	0	0	0	0	0	0
DD	Arthropods	2010		Porthmidius gelineki	0	0	0	0	0	0	0	0	0	0	0	0	0	0	0	0	0	0	0	0
DD	Arthropods	2009		Potamarcha puella	0	0	0	0	0	0	0	0	0	0	0	0	0	0	0	0	0	0	0	0
DD	Arthropods	2008		Potamiscus annandalii	0	0	0	0	0	0	0	0	0	0	0	0	0	0	0	0	0	0	0	0
DD	Arthropods	2008		Potamiscus decourcyi	0	0	0	0	0	0	0	0	0	0	0	0	0	0	0	0	0	0	0	0
DD	Arthropods	2008		Potamiscus loshingense	0	0	0	0	0	0	0	0	0	0	0	0	0	0	0	0	0	0	0	0
DD	Arthropods	2008		Potamiscus montosus	0	0	0	0	0	0	0	0	0	0	0	0	0	0	0	0	0	0	0	0
DD	Arthropods	2008		Potamiscus motuoense	0	0	0	0	0	0	0	0	0	0	0	0	0	0	0	0	0	0	0	0
DD	Arthropods	2008		Potamiscus pealianus	0	0	0	0	0	0	0	0	0	0	0	0	0	0	0	0	0	0	0	0
DD	Arthropods	2008		Potamiscus rangoonense	0	0	0	0	0	0	0	0	0	0	0	0	0	0	0	0	0	0	0	0
DD	Arthropods	2008		Potamiscus rongjingense	0	0	0	0	0	0	0	0	0	0	0	0	0	0	0	0	0	0	0	0
DD	Arthropods	2008		Potamiscus yongshengense	0	0	0	0	0	0	0	0	0	0	0	0	0	0	0	0	0	0	0	0
DD	Arthropods	2008		Potamiscus yunnanense	0	0	0	0	0	0	0	0	0	0	0	0	0	0	0	0	0	0	0	0
DD	Arthropods	2008		Potamocarcinus colombiensis	0	0	0	0	0	0	0	0	0	0	0	0	0	0	0	0	0	0	0	0
DD	Arthropods	2008		Potamocarcinus leptomelus	0	0	0	0	0	0	0	0	0	0	0	0	0	0	0	0	0	0	0	0
DD	Arthropods	2008		Potamocarcinus poglayeneuwalli	0	0	0	0	0	0	0	0	0	0	0	0	0	0	0	0	0	0	0	0
DD	Arthropods	2008		Potamonautes acristatus	0	0	0	0	0	0	0	0	0	0	0	0	0	0	0	0	0	0	0	0
DD	Arthropods	2008		Potamonautes adeleae	1	0	0	0	0	0	0	0	0	0	0	1	0	0	0	0	0	0	0	0
DD	Arthropods	2008		Potamonautes adentatus	0	0	0	0	0	0	0	0	0	0	0	0	0	0	0	0	0	0	0	0
DD	Arthropods	2008		Potamonautes amalerensis	0	0	0	0	0	0	0	0	0	0	0	0	0	0	0	0	0	0	0	0
DD	Arthropods	2008		Potamonautes bipartitus	0	0	0	0	0	0	0	0	0	0	0	0	0	0	0	0	0	0	0	0
DD	Arthropods	2008		Potamonautes didieri	0	0	0	0	0	0	0	0	0	0	0	0	0	0	0	0	0	0	0	0
DD	Arthropods	2007		Potamonautes dubius	0	0	0	0	0	0	0	0	0	0	0	0	0	0	0	0	0	0	0	0
DD	Arthropods	2008		Potamonautes lueboensis	0	0	0	0	0	0	0	0	0	0	0	0	0	0	0	0	0	0	0	0
DD	Arthropods	2007		Potamonautes macrobrachii	0	0	0	0	0	0	0	0	0	0	0	0	0	0	0	0	0	0	0	0
DD	Arthropods	2008		Potamonautes punctatus	0	0	0	0	0	0	0	0	0	0	0	0	0	0	0	0	0	0	0	0
DD	Arthropods	2008		Potamonautes rodolphianus	0	0	0	0	0	0	0	0	0	0	0	0	0	0	0	0	0	0	0	0
DD	Arthropods	2008		Potamonautes rothschildi	0	0	0	0	0	0	0	0	0	0	0	0	0	0	0	0	0	0	0	0
DD	Arthropods	2008		Potamonautes schubotzi	0	0	0	0	0	0	0	0	0	0	0	0	0	0	0	0	0	0	0	0
DD	Arthropods	2008		Potamonautes semilunaris	0	0	0	0	0	0	0	0	0	0	0	0	0	0	0	0	0	0	0	0
DD	Arthropods	2008		Potamonautes senegalensis	0	0	0	0	0	0	0	0	0	0	0	0	0	0	0	0	0	0	0	0
DD	Arthropods	2008		Potamonemus asylos	0	0	0	0	0	0	0	0	0	0	0	0	0	0	0	0	0	0	0	0
DD	Arthropods	2010		Procallimus egregius	0	0	0	0	0	0	0	0	0	0	0	0	0	0	0	0	0	0	0	0
DD	Arthropods	2010		Procambarus ancylus	0	0	0	0	0	0	0	0	0	0	0	0	0	0	0	0	0	0	0	0
DD	Arthropods	2010		Procambarus atkinsoni	0	0	0	0	0	0	0	0	0	0	0	0	0	0	0	0	0	0	0	0
DD	Arthropods	2010		Procambarus barbiger	0	0	0	0	0	0	0	0	0	0	0	0	0	0	0	0	0	0	0	0
DD	Arthropods	2010		Procambarus capillatus	0	0	0	0	0	0	0	0	0	0	0	0	0	0	0	0	0	0	0	0
DD	Arthropods	2010		Procambarus connus	0	0	0	0	0	0	0	0	0	0	0	0	0	0	0	0	0	0	0	0
DD	Arthropods	2010		Procambarus cubensis	5	0	0	0	0	1	0	0	1	0	1	0	0	1	1	0	0	0	0	0
DD	Arthropods	2010		Procambarus elegans	0	0	0	0	0	0	0	0	0	0	0	0	0	0	0	0	0	0	0	0
DD	Arthropods	2010		Procambarus erichsoni	0	0	0	0	0	0	0	0	0	0	0	0	0	0	0	0	0	0	0	0
DD	Arthropods	2010		Procambarus evermanni	0	0	0	0	0	0	0	0	0	0	0	0	0	0	0	0	0	0	0	0
DD	Arthropods	2010		Procambarus geodytes	0	0	0	0	0	0	0	0	0	0	0	0	0	0	0	0	0	0	0	0
DD	Arthropods	2010		Procambarus gibbus	0	0	0	0	0	0	0	0	0	0	0	0	0	0	0	0	0	0	0	0
DD	Arthropods	2010		Procambarus latipleurum	0	0	0	0	0	0	0	0	0	0	0	0	0	0	0	0	0	0	0	0
DD	Arthropods	2010		Procambarus lepidodactylus	0	0	0	0	0	0	0	0	0	0	0	0	0	0	0	0	0	0	0	0
DD	Arthropods	2010		Procambarus lewisi	0	0	0	0	0	0	0	0	0	0	0	0	0	0	0	0	0	0	0	0
DD	Arthropods	2010		Procambarus litosternum	0	0	0	0	0	0	0	0	0	0	0	0	0	0	0	0	0	0	0	0
DD	Arthropods	2010		Procambarus lunzi	0	0	0	0	0	0	0	0	0	0	0	0	0	0	0	0	0	0	0	0
DD	Arthropods	2010		Procambarus marthae	0	0	0	0	0	0	0	0	0	0	0	0	0	0	0	0	0	0	0	0
DD	Arthropods	2010		Procambarus medialis	0	0	0	0	0	0	0	0	0	0	0	0	0	0	0	0	0	0	0	0
DD	Arthropods	2010		Procambarus niveus	0	0	0	0	0	0	0	0	0	0	0	0	0	0	0	0	0	0	0	0
DD	Arthropods	2010		Procambarus nueces	0	0	0	0	0	0	0	0	0	0	0	0	0	0	0	0	0	0	0	0
DD	Arthropods	2010		Procambarus pearsei	0	0	0	0	0	0	0	0	0	0	0	0	0	0	0	0	0	0	0	0
DD	Arthropods	2010		Procambarus penni	0	0	0	0	0	0	0	0	0	0	0	0	0	0	0	0	0	0	0	0
DD	Arthropods	2010		Procambarus petersi	0	0	0	0	0	0	0	0	0	0	0	0	0	0	0	0	0	0	0	0
DD	Arthropods	2010		Procambarus pogum	0	0	0	0	0	0	0	0	0	0	0	0	0	0	0	0	0	0	0	0
DD	Arthropods	2010		Procambarus pubescens	0	0	0	0	0	0	0	0	0	0	0	0	0	0	0	0	0	0	0	0
DD	Arthropods	2010		Procambarus pubischelae	0	0	0	0	0	0	0	0	0	0	0	0	0	0	0	0	0	0	0	0
DD	Arthropods	2010		Procambarus pycnogonopodus	0	0	0	0	0	0	0	0	0	0	0	0	0	0	0	0	0	0	0	0
DD	Arthropods	2010		Procambarus raneyi	0	0	0	0	0	0	0	0	0	0	0	0	0	0	0	0	0	0	0	0
DD	Arthropods	2010		Procambarus rathbunae	0	0	0	0	0	0	0	0	0	0	0	0	0	0	0	0	0	0	0	0
DD	Arthropods	2010		Procambarus regalis	0	0	0	0	0	0	0	0	0	0	0	0	0	0	0	0	0	0	0	0
DD	Arthropods	2010		Procambarus reimeri	1	0	0	0	0	0	0	0	0	0	0	0	0	0	1	0	0	0	0	0
DD	Arthropods	2010		Procambarus rodriguezi	0	0	0	0	0	0	0	0	0	0	0	0	0	0	0	0	0	0	0	0
DD	Arthropods	2010		Procambarus rogersi	0	0	0	0	0	0	0	0	0	0	0	0	0	0	0	0	0	0	0	0
DD	Arthropods	2010		Procambarus sbordonii	0	0	0	0	0	0	0	0	0	0	0	0	0	0	0	0	0	0	0	0
DD	Arthropods	2010		Procambarus steigmani	0	0	0	0	0	0	0	0	0	0	0	0	0	0	0	0	0	0	0	0
DD	Arthropods	2010		Procambarus strenthi	0	0	0	0	0	0	0	0	0	0	0	0	0	0	0	0	0	0	0	0
DD	Arthropods	2010		Procambarus tenuis	0	0	0	0	0	0	0	0	0	0	0	0	0	0	0	0	0	0	0	0
DD	Arthropods	2010		Procambarus texanus	0	0	0	0	0	0	0	0	0	0	0	0	0	0	0	0	0	0	0	0
DD	Arthropods	2010		Procambarus teziutlanensis	0	0	0	0	0	0	0	0	0	0	0	0	0	0	0	0	0	0	0	0
DD	Arthropods	2010		Procambarus tlapacoyanensis	0	0	0	0	0	0	0	0	0	0	0	0	0	0	0	0	0	0	0	0
DD	Arthropods	2010		Procambarus veracruzanus	0	0	0	0	0	0	0	0	0	0	0	0	0	0	0	0	0	0	0	0
DD	Arthropods	2010		Procambarus villalobosi	0	0	0	0	0	0	0	0	0	0	0	0	0	0	0	0	0	0	0	0
DD	Arthropods	2010		Procambarus williamsoni	0	0	0	0	0	0	0	0	0	0	0	0	0	0	0	0	0	0	0	0
DD	Arthropods	2010		Procambarus xilitlae	0	0	0	0	0	0	0	0	0	0	0	0	0	0	0	0	0	0	0	0
DD	Arthropods	2010		Procambarus xochitlanae	0	0	0	0	0	0	0	0	0	0	0	0	0	0	0	0	0	0	0	0
DD	Arthropods	2010		Procambarus youngi	0	0	0	0	0	0	0	0	0	0	0	0	0	0	0	0	0	0	0	0
DD	Arthropods	2010		Procambarus zonangulus	16	1	0	0	1	2	1	1	0	2	1	1	0	0	1	4	0	1	0	0
DD	Arthropods	2009		Prodasineura abbreviata	0	0	0	0	0	0	0	0	0	0	0	0	0	0	0	0	0	0	0	0
DD	Arthropods	2009		Prodasineura flammula	0	0	0	0	0	0	0	0	0	0	0	0	0	0	0	0	0	0	0	0
DD	Arthropods	2006		Prodasineura flavifacies	0	0	0	0	0	0	0	0	0	0	0	0	0	0	0	0	0	0	0	0
DD	Arthropods	2010		Prodasineura odoneli	0	0	0	0	0	0	0	0	0	0	0	0	0	0	0	0	0	0	0	0
DD	Arthropods	2009		Prodasineura peramoena	0	0	0	0	0	0	0	0	0	0	0	0	0	0	0	0	0	0	0	0
DD	Arthropods	2009		Progomphus adaptatus	0	0	0	0	0	0	0	0	0	0	0	0	0	0	0	0	0	0	0	0
DD	Arthropods	2009		Progomphus amarillus	0	0	0	0	0	0	0	0	0	0	0	0	0	0	0	0	0	0	0	0
DD	Arthropods	2009		Progomphus amazonicus	0	0	0	0	0	0	0	0	0	0	0	0	0	0	0	0	0	0	0	0
DD	Arthropods	2009		Progomphus angeloi	0	0	0	0	0	0	0	0	0	0	0	0	0	0	0	0	0	0	0	0
DD	Arthropods	2009		Progomphus conjectus	0	0	0	0	0	0	0	0	0	0	0	0	0	0	0	0	0	0	0	0
DD	Arthropods	2009		Progomphus maculatus	0	0	0	0	0	0	0	0	0	0	0	0	0	0	0	0	0	0	0	0
DD	Arthropods	2009		Progomphus nigellus	0	0	0	0	0	0	0	0	0	0	0	0	0	0	0	0	0	0	0	0
DD	Arthropods	2009		Progomphus occidentalis	0	0	0	0	0	0	0	0	0	0	0	0	0	0	0	0	0	0	0	0
DD	Arthropods	2009		Progomphus recurvatus	0	0	0	0	0	0	0	0	0	0	0	0	0	0	0	0	0	0	0	0
DD	Arthropods	2006		Progomphus serenus	0	0	0	0	0	0	0	0	0	0	0	0	0	0	0	0	0	0	0	0
DD	Arthropods	2009		Progomphus tantillus	0	0	0	0	0	0	0	0	0	0	0	0	0	0	0	0	0	0	0	0
DD	Arthropods	2006		Proneura prolongata	0	0	0	0	0	0	0	0	0	0	0	0	0	0	0	0	0	0	0	0
DD	Arthropods	2010		Protaetia sardea	0	0	0	0	0	0	0	0	0	0	0	0	0	0	0	0	0	0	0	0
DD	Arthropods	2009		Protolestes furcatus	0	0	0	0	0	0	0	0	0	0	0	0	0	0	0	0	0	0	0	0
DD	Arthropods	2009		Protolestes kerckhoffae	0	0	0	0	0	0	0	0	0	0	0	0	0	0	0	0	0	0	0	0
DD	Arthropods	2006		Protoneura capillaris	0	0	0	0	0	0	0	0	0	0	0	0	0	0	0	0	0	0	0	0
DD	Arthropods	2009		Protoneura klugi	0	0	0	0	0	0	0	0	0	0	0	0	0	0	0	0	0	0	0	0
DD	Arthropods	2009		Protosticta feronia	1	0	0	0	0	0	0	0	0	0	0	0	0	0	0	0	0	1	0	0
DD	Arthropods	2010		Protosticta fraseri	0	0	0	0	0	0	0	0	0	0	0	0	0	0	0	0	0	0	0	0
DD	Arthropods	2010		Protosticta himalaica	0	0	0	0	0	0	0	0	0	0	0	0	0	0	0	0	0	0	0	0
DD	Arthropods	2009		Protosticta trilobata	0	0	0	0	0	0	0	0	0	0	0	0	0	0	0	0	0	0	0	0
DD	Arthropods	2009		Protosticta uncata	0	0	0	0	0	0	0	0	0	0	0	0	0	0	0	0	0	0	0	0
DD	Arthropods	2009		Protosticta versicolor	0	0	0	0	0	0	0	0	0	0	0	0	0	0	0	0	0	0	0	0
DD	Arthropods	2009		Pseudagrion ampolomitae	0	0	0	0	0	0	0	0	0	0	0	0	0	0	0	0	0	0	0	0
DD	Arthropods	2007		Pseudagrion angolense	0	0	0	0	0	0	0	0	0	0	0	0	0	0	0	0	0	0	0	0
DD	Arthropods	2009		Pseudagrion apicale	0	0	0	0	0	0	0	0	0	0	0	0	0	0	0	0	0	0	0	0
DD	Arthropods	2009		Pseudagrion azureum	0	0	0	0	0	0	0	0	0	0	0	0	0	0	0	0	0	0	0	0
DD	Arthropods	2009		Pseudagrion cheliferum	0	0	0	0	0	0	0	0	0	0	0	0	0	0	0	0	0	0	0	0
DD	Arthropods	2006		Pseudagrion coeruleipunctum	0	0	0	0	0	0	0	0	0	0	0	0	0	0	0	0	0	0	0	0
DD	Arthropods	2009		Pseudagrion coomansi	0	0	0	0	0	0	0	0	0	0	0	0	0	0	0	0	0	0	0	0
DD	Arthropods	2009		Pseudagrion deconcertans	0	0	0	0	0	0	0	0	0	0	0	0	0	0	0	0	0	0	0	0
DD	Arthropods	2010		Pseudagrion dundoense	0	0	0	0	0	0	0	0	0	0	0	0	0	0	0	0	0	0	0	0
DD	Arthropods	2010		Pseudagrion grilloti	0	0	0	0	0	0	0	0	0	0	0	0	0	0	0	0	0	0	0	0
DD	Arthropods	2009		Pseudagrion hamulus	0	0	0	0	0	0	0	0	0	0	0	0	0	0	0	0	0	0	0	0
DD	Arthropods	2009		Pseudagrion igniceps	0	0	0	0	0	0	0	0	0	0	0	0	0	0	0	0	0	0	0	0
DD	Arthropods	2009		Pseudagrion indicum	0	0	0	0	0	0	0	0	0	0	0	0	0	0	0	0	0	0	0	0
DD	Arthropods	2009		Pseudagrion nigripes	0	0	0	0	0	0	0	0	0	0	0	0	0	0	0	0	0	0	0	0
DD	Arthropods	2009		Pseudagrion nigrofasciatum	0	0	0	0	0	0	0	0	0	0	0	0	0	0	0	0	0	0	0	0
DD	Arthropods	2009		Pseudagrion renaudi	0	0	0	0	0	0	0	0	0	0	0	0	0	0	0	0	0	0	0	0
DD	Arthropods	2009		Pseudagrion samoensis	0	0	0	0	0	0	0	0	0	0	0	0	0	0	0	0	0	0	0	0
DD	Arthropods	2009		Pseudagrion schmidtianum	0	0	0	0	0	0	0	0	0	0	0	0	0	0	0	0	0	0	0	0
DD	Arthropods	2009		Pseudagrion spinithoracicum	0	0	0	0	0	0	0	0	0	0	0	0	0	0	0	0	0	0	0	0
DD	Arthropods	2009		Pseudagrion tinctipenne	0	0	0	0	0	0	0	0	0	0	0	0	0	0	0	0	0	0	0	0
DD	Arthropods	2009		Pseudagrion vakoanae	0	0	0	0	0	0	0	0	0	0	0	0	0	0	0	0	0	0	0	0
DD	Arthropods	2009		Pseudagrionoptera diotima	0	0	0	0	0	0	0	0	0	0	0	0	0	0	0	0	0	0	0	0
DD	Arthropods	2010		Pseudosphegesthes cinerea	1	0	0	0	0	0	0	0	0	0	0	0	0	0	0	1	0	0	0	0
DD	Arthropods	2008		Pseudothelphusa digueti	0	0	0	0	0	0	0	0	0	0	0	0	0	0	0	0	0	0	0	0
DD	Arthropods	2008		Pseudothelphusa doenitzi	0	0	0	0	0	0	0	0	0	0	0	0	0	0	0	0	0	0	0	0
DD	Arthropods	2008		Pseudothelphusa dugesti	0	0	0	0	0	0	0	0	0	0	0	0	0	0	0	0	0	0	0	0
DD	Arthropods	2008		Pseudothelphusa galloi	0	0	0	0	0	0	0	0	0	0	0	0	0	0	0	0	0	0	0	0
DD	Arthropods	2008		Pseudothelphusa granatensis	0	0	0	0	0	0	0	0	0	0	0	0	0	0	0	0	0	0	0	0
DD	Arthropods	2008		Pseudothelphusa hoffmannae	0	0	0	0	0	0	0	0	0	0	0	0	0	0	0	0	0	0	0	0
DD	Arthropods	2008		Pseudothelphusa leiophrys	0	0	0	0	0	0	0	0	0	0	0	0	0	0	0	0	0	0	0	0
DD	Arthropods	2008		Pseudothelphusa lophophallus	0	0	0	0	0	0	0	0	0	0	0	0	0	0	0	0	0	0	0	0
DD	Arthropods	2008		Pseudothelphusa mexicana	0	0	0	0	0	0	0	0	0	0	0	0	0	0	0	0	0	0	0	0
DD	Arthropods	2008		Pseudothelphusa morelosis	0	0	0	0	0	0	0	0	0	0	0	0	0	0	0	0	0	0	0	0
DD	Arthropods	2008		Pseudothelphusa nayaritae	0	0	0	0	0	0	0	0	0	0	0	0	0	0	0	0	0	0	0	0
DD	Arthropods	2008		Pseudothelphusa parabelliana	0	0	0	0	0	0	0	0	0	0	0	0	0	0	0	0	0	0	0	0
DD	Arthropods	2008		Pseudothelphusa peyotensis	0	0	0	0	0	0	0	0	0	0	0	0	0	0	0	0	0	0	0	0
DD	Arthropods	2008		Pseudothelphusa puntarenas	0	0	0	0	0	0	0	0	0	0	0	0	0	0	0	0	0	0	0	0
DD	Arthropods	2008		Pseudothelphusa rechingeri	0	0	0	0	0	0	0	0	0	0	0	0	0	0	0	0	0	0	0	0
DD	Arthropods	2008		Pseudothelphusa seiferti	0	0	0	0	0	0	0	0	0	0	0	0	0	0	0	0	0	0	0	0
DD	Arthropods	2008		Pseudothelphusa sonorae	0	0	0	0	0	0	0	0	0	0	0	0	0	0	0	0	0	0	0	0
DD	Arthropods	2008		Pseudothelphusa terrestris	0	0	0	0	0	0	0	0	0	0	0	0	0	0	0	0	0	0	0	0
DD	Arthropods	2010		Pseudotramea prateri	0	0	0	0	0	0	0	0	0	0	0	0	0	0	0	0	0	0	0	0
DD	Arthropods	2008		Ptychophallus cocleensis	0	0	0	0	0	0	0	0	0	0	0	0	0	0	0	0	0	0	0	0
DD	Arthropods	2008		Ptychophallus costaricaensis	0	0	0	0	0	0	0	0	0	0	0	0	0	0	0	0	0	0	0	0
DD	Arthropods	2008		Ptychophallus goldmanni	0	0	0	0	0	0	0	0	0	0	0	0	0	0	0	0	0	0	0	0
DD	Arthropods	2008		Ptychophallus lavallensis	0	0	0	0	0	0	0	0	0	0	0	0	0	0	0	0	0	0	0	0
DD	Arthropods	2008		Ptychophallus micracanthus	0	0	0	0	0	0	0	0	0	0	0	0	0	0	0	0	0	0	0	0
DD	Arthropods	2008		Ptychophallus montanus	0	0	0	0	0	0	0	0	0	0	0	0	0	0	0	0	0	0	0	0
DD	Arthropods	2008		Ptychophallus paraxanthusi	1	0	0	0	0	0	0	0	0	0	0	0	0	0	0	0	0	0	1	0
DD	Arthropods	2008		Pudaengon arnamicai	0	0	0	0	0	0	0	0	0	0	0	0	0	0	0	0	0	0	0	0
DD	Arthropods	2008		Pudaengon hinpoon	0	0	0	0	0	0	0	0	0	0	0	0	0	0	0	0	0	0	0	0
DD	Arthropods	2008		Pudaengon inornatum	0	0	0	0	0	0	0	0	0	0	0	0	0	0	0	0	0	0	0	0
DD	Arthropods	2008		Pudaengon khammouan	0	0	0	0	0	0	0	0	0	0	0	0	0	0	0	0	0	0	0	0
DD	Arthropods	2008		Pudaengon mukdahan	0	0	0	0	0	0	0	0	0	0	0	0	0	0	0	0	0	0	0	0
DD	Arthropods	2008		Pudaengon sakonnakorn	0	0	0	0	0	0	0	0	0	0	0	0	0	0	0	0	0	0	0	0
DD	Arthropods	2008		Pudaengon thatphanom	0	0	0	0	0	0	0	0	0	0	0	0	0	0	0	0	0	0	0	0
DD	Arthropods	2008		Pudaengon wanonniwat	0	0	0	0	0	0	0	0	0	0	0	0	0	0	0	0	0	0	0	0
DD	Arthropods	2008		Pupamon namuan	0	0	0	0	0	0	0	0	0	0	0	0	0	0	0	0	0	0	0	0
DD	Arthropods	2008		Pupamon nayung	0	0	0	0	0	0	0	0	0	0	0	0	0	0	0	0	0	0	0	0
DD	Arthropods	2008		Pupamon pealianoides	0	0	0	0	0	0	0	0	0	0	0	0	0	0	0	0	0	0	0	0
DD	Arthropods	2010		Purpuricenus globulicollis	0	0	0	0	0	0	0	0	0	0	0	0	0	0	0	0	0	0	0	0
DD	Arthropods	2010		Purpuricenus graecus	0	0	0	0	0	0	0	0	0	0	0	0	0	0	0	0	0	0	0	0
DD	Arthropods	2008		Qiangpotamon wulingense	0	0	0	0	0	0	0	0	0	0	0	0	0	0	0	0	0	0	0	0
DD	Arthropods	2008		Quadramon aborense	0	0	0	0	0	0	0	0	0	0	0	0	0	0	0	0	0	0	0	0
DD	Arthropods	2008		Quadramon mooleyitensis	0	0	0	0	0	0	0	0	0	0	0	0	0	0	0	0	0	0	0	0
DD	Arthropods	2008		Quadramon obliteratum	0	0	0	0	0	0	0	0	0	0	0	0	0	0	0	0	0	0	0	0
DD	Arthropods	2008		Raddaus tuberculatus	0	0	0	0	0	0	0	0	0	0	0	0	0	0	0	0	0	0	0	0
DD	Arthropods	2008		Rathbunamon lacunifer	0	0	0	0	0	0	0	0	0	0	0	0	0	0	0	0	0	0	0	0
DD	Arthropods	2009		Rhinagrion tricolor	0	0	0	0	0	0	0	0	0	0	0	0	0	0	0	0	0	0	0	0
DD	Arthropods	2009		Rhinocypha cuneata	0	0	0	0	0	0	0	0	0	0	0	0	0	0	0	0	0	0	0	0
DD	Arthropods	2010		Rhinocypha hilaryae	0	0	0	0	0	0	0	0	0	0	0	0	0	0	0	0	0	0	0	0
DD	Arthropods	2009		Rhinocypha liberata	0	0	0	0	0	0	0	0	0	0	0	0	0	0	0	0	0	0	0	0
DD	Arthropods	2010		Rhinocypha trimaculata	0	0	0	0	0	0	0	0	0	0	0	0	0	0	0	0	0	0	0	0
DD	Arthropods	2010		Rhinocypha vitrinella	0	0	0	0	0	0	0	0	0	0	0	0	0	0	0	0	0	0	0	0
DD	Arthropods	2009		Rhinoneura caerulea	0	0	0	0	0	0	0	0	0	0	0	0	0	0	0	0	0	0	0	0
DD	Arthropods	2009		Rhionaeschna vazquezae	0	0	0	0	0	0	0	0	0	0	0	0	0	0	0	0	0	0	0	0
DD	Arthropods	2010		Rhipidolestes malaisei	0	0	0	0	0	0	0	0	0	0	0	0	0	0	0	0	0	0	0	0
DD	Arthropods	2009		Rhipidolestes rubripes	0	0	0	0	0	0	0	0	0	0	0	0	0	0	0	0	0	0	0	0
DD	Arthropods	2009		Rhyacocnemis leonorae	0	0	0	0	0	0	0	0	0	0	0	0	0	0	0	0	0	0	0	0
DD	Arthropods	2009		Rhyacocnemis prothoracica	0	0	0	0	0	0	0	0	0	0	0	0	0	0	0	0	0	0	0	0
DD	Arthropods	2010		Rhyothemis splendens	0	0	0	0	0	0	0	0	0	0	0	0	0	0	0	0	0	0	0	0
DD	Arthropods	2009		Risiophlebia risi	0	0	0	0	0	0	0	0	0	0	0	0	0	0	0	0	0	0	0	0
DD	Arthropods	2008		Rodriguezia mensabak	0	0	0	0	0	0	0	0	0	0	0	0	0	0	0	0	0	0	0	0
DD	Arthropods	2008		Rodriguezia villalobosi	0	0	0	0	0	0	0	0	0	0	0	0	0	0	0	0	0	0	0	0
DD	Arthropods	2008		Rouxana ingrami	0	0	0	0	0	0	0	0	0	0	0	0	0	0	0	0	0	0	0	0
DD	Arthropods	2008		Rouxana minima	0	0	0	0	0	0	0	0	0	0	0	0	0	0	0	0	0	0	0	0
DD	Arthropods	2008		Rouxana papuana	0	0	0	0	0	0	0	0	0	0	0	0	0	0	0	0	0	0	0	0
DD	Arthropods	2008		Rouxana phreatica	0	0	0	0	0	0	0	0	0	0	0	0	0	0	0	0	0	0	0	0
DD	Arthropods	2008		Rouxana plana	0	0	0	0	0	0	0	0	0	0	0	0	0	0	0	0	0	0	0	0
DD	Arthropods	2008		Rouxana roushdyi	0	0	0	0	0	0	0	0	0	0	0	0	0	0	0	0	0	0	0	0
DD	Arthropods	2008		Rouxana wakipensis	0	0	0	0	0	0	0	0	0	0	0	0	0	0	0	0	0	0	0	0
DD	Arthropods	2010		Samastacus spinifrons	7	0	0	0	1	0	0	1	1	0	0	0	0	0	0	1	1	0	2	0
DD	Arthropods	2009		Sapho fumosa	0	0	0	0	0	0	0	0	0	0	0	0	0	0	0	0	0	0	0	0
DD	Arthropods	2008		Sartoriana afghaniensis	0	0	0	0	0	0	0	0	0	0	0	0	0	0	0	0	0	0	0	0
DD	Arthropods	2008		Sartoriana rokitanskyi	1	0	0	0	0	0	0	0	0	0	0	0	0	0	1	0	0	0	0	0
DD	Arthropods	2008		Sartoriana trilobata	0	0	0	0	0	0	0	0	0	0	0	0	0	0	0	0	0	0	0	0
DD	Arthropods	2009		Schmidtiphaea schmidi	0	0	0	0	0	0	0	0	0	0	0	0	0	0	0	0	0	0	0	0
DD	Arthropods	2004		Scotorythra paratactis	0	0	0	0	0	0	0	0	0	0	0	0	0	0	0	0	0	0	0	0
DD	Arthropods	2009		Selysioneura arboricola	0	0	0	0	0	0	0	0	0	0	0	0	0	0	0	0	0	0	0	0
DD	Arthropods	2009		Selysioneura bacilllus	0	0	0	0	0	0	0	0	0	0	0	0	0	0	0	0	0	0	0	0
DD	Arthropods	2009		Selysioneura rhaphia	0	0	0	0	0	0	0	0	0	0	0	0	0	0	0	0	0	0	0	0
DD	Arthropods	2009		Selysioneura virgula	0	0	0	0	0	0	0	0	0	0	0	0	0	0	0	0	0	0	0	0
DD	Arthropods	2008		Sendleria genuitei	0	0	0	0	0	0	0	0	0	0	0	0	0	0	0	0	0	0	0	0
DD	Arthropods	2008		Sendleria gjellerupi	0	0	0	0	0	0	0	0	0	0	0	0	0	0	0	0	0	0	0	0
DD	Arthropods	2008		Sendleria gloriosa	0	0	0	0	0	0	0	0	0	0	0	0	0	0	0	0	0	0	0	0
DD	Arthropods	2008		Sendleria salomonis	0	0	0	0	0	0	0	0	0	0	0	0	0	0	0	0	0	0	0	0
DD	Arthropods	2008		Setosamon somchaii	0	0	0	0	0	0	0	0	0	0	0	0	0	0	0	0	0	0	0	0
DD	Arthropods	2008		Setosamon ubon	0	0	0	0	0	0	0	0	0	0	0	0	0	0	0	0	0	0	0	0
DD	Arthropods	2008		Shanphusa browneana	0	0	0	0	0	0	0	0	0	0	0	0	0	0	0	0	0	0	0	0
DD	Arthropods	2008		Shanphusa curtobates	0	0	0	0	0	0	0	0	0	0	0	0	0	0	0	0	0	0	0	0
DD	Arthropods	2008		Siamthelphusa faxoni	0	0	0	0	0	0	0	0	0	0	0	0	0	0	0	0	0	0	0	0
DD	Arthropods	2009		Sieboldius alexanderi	0	0	0	0	0	0	0	0	0	0	0	0	0	0	0	0	0	0	0	0
DD	Arthropods	2009		Sinogomphus scissus	0	0	0	0	0	0	0	0	0	0	0	0	0	0	0	0	0	0	0	0
DD	Arthropods	2009		Sinogomphus telamon	0	0	0	0	0	0	0	0	0	0	0	0	0	0	0	0	0	0	0	0
DD	Arthropods	2008		Sinopotamon anhuiense	0	0	0	0	0	0	0	0	0	0	0	0	0	0	0	0	0	0	0	0
DD	Arthropods	2008		Sinopotamon chengkuense	0	0	0	0	0	0	0	0	0	0	0	0	0	0	0	0	0	0	0	0
DD	Arthropods	2008		Sinopotamon cochlearidigitum	0	0	0	0	0	0	0	0	0	0	0	0	0	0	0	0	0	0	0	0
DD	Arthropods	2008		Sinopotamon emeiense	0	0	0	0	0	0	0	0	0	0	0	0	0	0	0	0	0	0	0	0
DD	Arthropods	2008		Sinopotamon fukienense	0	0	0	0	0	0	0	0	0	0	0	0	0	0	0	0	0	0	0	0
DD	Arthropods	2008		Sinopotamon fuxingense	0	0	0	0	0	0	0	0	0	0	0	0	0	0	0	0	0	0	0	0
DD	Arthropods	2008		Sinopotamon introdigitum	0	0	0	0	0	0	0	0	0	0	0	0	0	0	0	0	0	0	0	0
DD	Arthropods	2008		Sinopotamon koatenense	0	0	0	0	0	0	0	0	0	0	0	0	0	0	0	0	0	0	0	0
DD	Arthropods	2008		Sinopotamon linhuaense	0	0	0	0	0	0	0	0	0	0	0	0	0	0	0	0	0	0	0	0
DD	Arthropods	2008		Sinopotamon liuyangense	0	0	0	0	0	0	0	0	0	0	0	0	0	0	0	0	0	0	0	0
DD	Arthropods	2008		Sinopotamon loudiense	0	0	0	0	0	0	0	0	0	0	0	0	0	0	0	0	0	0	0	0
DD	Arthropods	2008		Sinopotamon ningganense	0	0	0	0	0	0	0	0	0	0	0	0	0	0	0	0	0	0	0	0
DD	Arthropods	2008		Sinopotamon parvum	0	0	0	0	0	0	0	0	0	0	0	0	0	0	0	0	0	0	0	0
DD	Arthropods	2008		Sinopotamon pingshanense	0	0	0	0	0	0	0	0	0	0	0	0	0	0	0	0	0	0	0	0
DD	Arthropods	2008		Sinopotamon quadratapodum	0	0	0	0	0	0	0	0	0	0	0	0	0	0	0	0	0	0	0	0
DD	Arthropods	2008		Sinopotamon rongshuiense	0	0	0	0	0	0	0	0	0	0	0	0	0	0	0	0	0	0	0	0
DD	Arthropods	2008		Sinopotamon siguqiaoense	0	0	0	0	0	0	0	0	0	0	0	0	0	0	0	0	0	0	0	0
DD	Arthropods	2008		Sinopotamon taoyuanense	0	0	0	0	0	0	0	0	0	0	0	0	0	0	0	0	0	0	0	0
DD	Arthropods	2008		Sinopotamon tinghsiangense	0	0	0	0	0	0	0	0	0	0	0	0	0	0	0	0	0	0	0	0
DD	Arthropods	2008		Sinopotamon turgidum	0	0	0	0	0	0	0	0	0	0	0	0	0	0	0	0	0	0	0	0
DD	Arthropods	2008		Sinopotamon unaequum	0	0	0	0	0	0	0	0	0	0	0	0	0	0	0	0	0	0	0	0
DD	Arthropods	2008		Sinopotamon weiyuanense	0	0	0	0	0	0	0	0	0	0	0	0	0	0	0	0	0	0	0	0
DD	Arthropods	2008		Sinopotamon wushanense	0	0	0	0	0	0	0	0	0	0	0	0	0	0	0	0	0	0	0	0
DD	Arthropods	2008		Sinopotamon xiushuiense	0	0	0	0	0	0	0	0	0	0	0	0	0	0	0	0	0	0	0	0
DD	Arthropods	2008		Sinopotamon yixianense	0	0	0	0	0	0	0	0	0	0	0	0	0	0	0	0	0	0	0	0
DD	Arthropods	2008		Sinopotamon yueyangense	0	0	0	0	0	0	0	0	0	0	0	0	0	0	0	0	0	0	0	0
DD	Arthropods	2008		Sinopotamon yushanense	0	0	0	0	0	0	0	0	0	0	0	0	0	0	0	0	0	0	0	0
DD	Arthropods	2008		Skelosophusa eumeces	0	0	0	0	0	0	0	0	0	0	0	0	0	0	0	0	0	0	0	0
DD	Arthropods	2008		Skelosophusa gollardi	0	0	0	0	0	0	0	0	0	0	0	0	0	0	0	0	0	0	0	0
DD	Arthropods	2008		Skelosophusa prolixa	1	0	0	0	0	0	0	0	0	0	0	0	0	0	1	0	0	0	0	0
DD	Arthropods	2008		Smalleyus tricristatus	0	0	0	0	0	0	0	0	0	0	0	0	0	0	0	0	0	0	0	0
DD	Arthropods	2008		Snaha escheri	0	0	0	0	0	0	0	0	0	0	0	0	0	0	0	0	0	0	0	0
DD	Arthropods	2008		Somanniathelphusa bawangensis	0	0	0	0	0	0	0	0	0	0	0	0	0	0	0	0	0	0	0	0
DD	Arthropods	2008		Somanniathelphusa boyangensis	0	0	0	0	0	0	0	0	0	0	0	0	0	0	0	0	0	0	0	0
DD	Arthropods	2008		Somanniathelphusa falx	0	0	0	0	0	0	0	0	0	0	0	0	0	0	0	0	0	0	0	0
DD	Arthropods	2008		Somanniathelphusa hainanensis	0	0	0	0	0	0	0	0	0	0	0	0	0	0	0	0	0	0	0	0
DD	Arthropods	2008		Somanniathelphusa huanglungensis	0	0	0	0	0	0	0	0	0	0	0	0	0	0	0	0	0	0	0	0
DD	Arthropods	2008		Somanniathelphusa kyphuensis	0	0	0	0	0	0	0	0	0	0	0	0	0	0	0	0	0	0	0	0
DD	Arthropods	2008		Somanniathelphusa lacuvita	0	0	0	0	0	0	0	0	0	0	0	0	0	0	0	0	0	0	0	0
DD	Arthropods	2008		Somanniathelphusa linchuanensis	0	0	0	0	0	0	0	0	0	0	0	0	0	0	0	0	0	0	0	0
DD	Arthropods	2008		Somanniathelphusa qiongshanensis	0	0	0	0	0	0	0	0	0	0	0	0	0	0	0	0	0	0	0	0
DD	Arthropods	2008		Somanniathelphusa ruijinensis	0	0	0	0	0	0	0	0	0	0	0	0	0	0	0	0	0	0	0	0
DD	Arthropods	2008		Somanniathelphusa sinensis	0	0	0	0	0	0	0	0	0	0	0	0	0	0	0	0	0	0	0	0
DD	Arthropods	2008		Somanniathelphusa zhongshiensis	0	0	0	0	0	0	0	0	0	0	0	0	0	0	0	0	0	0	0	0
DD	Arthropods	2010		Somatochlora daviesi	0	0	0	0	0	0	0	0	0	0	0	0	0	0	0	0	0	0	0	0
DD	Arthropods	2009		Somatochlora georgiana	1	0	0	0	0	0	1	0	0	0	0	0	0	0	0	0	0	0	0	0
DD	Arthropods	2006		Somatochlora sahlbergi	0	0	0	0	0	0	0	0	0	0	0	0	0	0	0	0	0	0	0	0
DD	Arthropods	2009		Spinaeschna watsoni	0	0	0	0	0	0	0	0	0	0	0	0	0	0	0	0	0	0	0	0
DD	Arthropods	2008		Spiralothelphusa wuellerstorfi	0	0	0	0	0	0	0	0	0	0	0	0	0	0	0	0	0	0	0	0
DD	Arthropods	2008		Spirothelphusa verticalis	0	0	0	0	0	0	0	0	0	0	0	0	0	0	0	0	0	0	0	0
DD	Arthropods	2009		Staurophlebia gigantula	0	0	0	0	0	0	0	0	0	0	0	0	0	0	0	0	0	0	0	0
DD	Arthropods	2008		Stelomon turgidulimanus	0	0	0	0	0	0	0	0	0	0	0	0	0	0	0	0	0	0	0	0
DD	Arthropods	2010		Stenagostus laufferi	0	0	0	0	0	0	0	0	0	0	0	0	0	0	0	0	0	0	0	0
DD	Arthropods	2010		Stenagostus sardiniensis	0	0	0	0	0	0	0	0	0	0	0	0	0	0	0	0	0	0	0	0
DD	Arthropods	2010		Stenopterus similatus	0	0	0	0	0	0	0	0	0	0	0	0	0	0	0	0	0	0	0	0
DD	Arthropods	2008		Strengeriana bolivarensis	0	0	0	0	0	0	0	0	0	0	0	0	0	0	0	0	0	0	0	0
DD	Arthropods	2008		Strengeriana cajaensis	0	0	0	0	0	0	0	0	0	0	0	0	0	0	0	0	0	0	0	0
DD	Arthropods	2008		Strengeriana flagellata	0	0	0	0	0	0	0	0	0	0	0	0	0	0	0	0	0	0	0	0
DD	Arthropods	2008		Strengeriana florenciae	0	0	0	0	0	0	0	0	0	0	0	0	0	0	0	0	0	0	0	0
DD	Arthropods	2008		Strengeriana foresti	0	0	0	0	0	0	0	0	0	0	0	0	0	0	0	0	0	0	0	0
DD	Arthropods	2008		Strengeriana huilensis	0	0	0	0	0	0	0	0	0	0	0	0	0	0	0	0	0	0	0	0
DD	Arthropods	2008		Strengeriana taironae	0	0	0	0	0	0	0	0	0	0	0	0	0	0	0	0	0	0	0	0
DD	Arthropods	2008		Strengeriana tolimensis	0	0	0	0	0	0	0	0	0	0	0	0	0	0	0	0	0	0	0	0
DD	Arthropods	2008		Stygothelphusa nobilii	0	0	0	0	0	0	0	0	0	0	0	0	0	0	0	0	0	0	0	0
DD	Arthropods	2009		Stylogomphus changi	0	0	0	0	0	0	0	0	0	0	0	0	0	0	0	0	0	0	0	0
DD	Arthropods	2009		Stylogomphus tantulus	0	0	0	0	0	0	0	0	0	0	0	0	0	0	0	0	0	0	0	0
DD	Arthropods	2009		Stylurus endicotti	0	0	0	0	0	0	0	0	0	0	0	0	0	0	0	0	0	0	0	0
DD	Arthropods	2009		Stylurus flavicornis	0	0	0	0	0	0	0	0	0	0	0	0	0	0	0	0	0	0	0	0
DD	Arthropods	2009		Stylurus gideon	0	0	0	0	0	0	0	0	0	0	0	0	0	0	0	0	0	0	0	0
DD	Arthropods	2009		Stylurus takashii	0	0	0	0	0	0	0	0	0	0	0	0	0	0	0	0	0	0	0	0
DD	Arthropods	2008		Sudanonautes orthostylis	0	0	0	0	0	0	0	0	0	0	0	0	0	0	0	0	0	0	0	0
DD	Arthropods	2008		Sundathelphusa antipoloensis	0	0	0	0	0	0	0	0	0	0	0	0	0	0	0	0	0	0	0	0
DD	Arthropods	2008		Sundathelphusa aruana	0	0	0	0	0	0	0	0	0	0	0	0	0	0	0	0	0	0	0	0
DD	Arthropods	2008		Sundathelphusa celer	0	0	0	0	0	0	0	0	0	0	0	0	0	0	0	0	0	0	0	0
DD	Arthropods	2008		Sundathelphusa halmaherensis	0	0	0	0	0	0	0	0	0	0	0	0	0	0	0	0	0	0	0	0
DD	Arthropods	2008		Sundathelphusa jagori	0	0	0	0	0	0	0	0	0	0	0	0	0	0	0	0	0	0	0	0
DD	Arthropods	2008		Sundathelphusa leschenaultii	0	0	0	0	0	0	0	0	0	0	0	0	0	0	0	0	0	0	0	0
DD	Arthropods	2008		Sundathelphusa longipes	0	0	0	0	0	0	0	0	0	0	0	0	0	0	0	0	0	0	0	0
DD	Arthropods	2008		Sundathelphusa mistio	0	0	0	0	0	0	0	0	0	0	0	0	0	0	0	0	0	0	0	0
DD	Arthropods	2008		Sundathelphusa montana	0	0	0	0	0	0	0	0	0	0	0	0	0	0	0	0	0	0	0	0
DD	Arthropods	2008		Sundathelphusa montanoanus	0	0	0	0	0	0	0	0	0	0	0	0	0	0	0	0	0	0	0	0
DD	Arthropods	2008		Sundathelphusa philippina	1	0	0	0	0	0	0	0	0	0	0	0	0	0	0	0	0	0	1	0
DD	Arthropods	2008		Sundathelphusa picta	0	0	0	0	0	0	0	0	0	0	0	0	0	0	0	0	0	0	0	0
DD	Arthropods	2008		Sundathelphusa subquadratus	0	0	0	0	0	0	0	0	0	0	0	0	0	0	0	0	0	0	0	0
DD	Arthropods	2008		Sundathelphusa sutteri	0	0	0	0	0	0	0	0	0	0	0	0	0	0	0	0	0	0	0	0
DD	Arthropods	2008		Sundathelphusa wolterecki	0	0	0	0	0	0	0	0	0	0	0	0	0	0	0	0	0	0	0	0
DD	Arthropods	2009		Sympetrum chaconi	0	0	0	0	0	0	0	0	0	0	0	0	0	0	0	0	0	0	0	0
DD	Arthropods	2010		Sympetrum himalayanum	0	0	0	0	0	0	0	0	0	0	0	0	0	0	0	0	0	0	0	0
DD	Arthropods	2010		Sympetrum orientale	0	0	0	0	0	0	0	0	0	0	0	0	0	0	0	0	0	0	0	0
DD	Arthropods	2009		Synthemis evelynae	0	0	0	0	0	0	0	0	0	0	0	0	0	0	0	0	0	0	0	0
DD	Arthropods	2009		Synthemis flexicauda	0	0	0	0	0	0	0	0	0	0	0	0	0	0	0	0	0	0	0	0
DD	Arthropods	2008		Takpotamon maesotense	0	0	0	0	0	0	0	0	0	0	0	0	0	0	0	0	0	0	0	0
DD	Arthropods	2009		Tapeinothemis boharti	0	0	0	0	0	0	0	0	0	0	0	0	0	0	0	0	0	0	0	0
DD	Arthropods	2009		Tatocnemis crenulatipennis	0	0	0	0	0	0	0	0	0	0	0	0	0	0	0	0	0	0	0	0
DD	Arthropods	2009		Tatocnemis virginiae	0	0	0	0	0	0	0	0	0	0	0	0	0	0	0	0	0	0	0	0
DD	Arthropods	2008		Tehuana complanata	0	0	0	0	0	0	0	0	0	0	0	0	0	0	0	0	0	0	0	0
DD	Arthropods	2008		Tehuana guerreroensis	1	0	0	0	0	0	0	0	0	0	0	0	0	0	0	0	0	0	0	1
DD	Arthropods	2008		Tehuana lamellifrons	0	0	0	0	0	0	0	0	0	0	0	0	0	0	0	0	0	0	0	0
DD	Arthropods	2009		Teinobasis argiocnemis	0	0	0	0	0	0	0	0	0	0	0	0	0	0	0	0	0	0	0	0
DD	Arthropods	2009		Teinobasis nitescens	0	0	0	0	0	0	0	0	0	0	0	0	0	0	0	0	0	0	0	0
DD	Arthropods	2009		Teinobasis prothoracica	0	0	0	0	0	0	0	0	0	0	0	0	0	0	0	0	0	0	0	0
DD	Arthropods	2009		Teinobasis simulans	0	0	0	0	0	0	0	0	0	0	0	0	0	0	0	0	0	0	0	0
DD	Arthropods	2009		Telagrion cornicauda	0	0	0	0	0	0	0	0	0	0	0	0	0	0	0	0	0	0	0	0
DD	Arthropods	2009		Telagrion quadricolor	0	0	0	0	0	0	0	0	0	0	0	0	0	0	0	0	0	0	0	0
DD	Arthropods	2009		Telebasis versicolor	0	0	0	0	0	0	0	0	0	0	0	0	0	0	0	0	0	0	0	0
DD	Arthropods	2010		Tenebroides fuscus	0	0	0	0	0	0	0	0	0	0	0	0	0	0	0	0	0	0	0	0
DD	Arthropods	2008		Tenuilapotamon inflexum	0	0	0	0	0	0	0	0	0	0	0	0	0	0	0	0	0	0	0	0
DD	Arthropods	2008		Tenuilapotamon joshuiense	0	0	0	0	0	0	0	0	0	0	0	0	0	0	0	0	0	0	0	0
DD	Arthropods	2008		Tenuipotamon baishuiense	0	0	0	0	0	0	0	0	0	0	0	0	0	0	0	0	0	0	0	0
DD	Arthropods	2008		Tenuipotamon huaningense	0	0	0	0	0	0	0	0	0	0	0	0	0	0	0	0	0	0	0	0
DD	Arthropods	2008		Tenuipotamon panxiense	0	0	0	0	0	0	0	0	0	0	0	0	0	0	0	0	0	0	0	0
DD	Arthropods	2008		Tenuipotamon purpura	0	0	0	0	0	0	0	0	0	0	0	0	0	0	0	0	0	0	0	0
DD	Arthropods	2008		Tenuipotamon tonghaiense	0	0	0	0	0	0	0	0	0	0	0	0	0	0	0	0	0	0	0	0
DD	Arthropods	2008		Tenuipotamon xinpingense	0	0	0	0	0	0	0	0	0	0	0	0	0	0	0	0	0	0	0	0
DD	Arthropods	2008		Tenuipotamon yuxiense	0	0	0	0	0	0	0	0	0	0	0	0	0	0	0	0	0	0	0	0
DD	Arthropods	2008		Teretamon adiatretum	0	0	0	0	0	0	0	0	0	0	0	0	0	0	0	0	0	0	0	0
DD	Arthropods	2008		Terrathelphusa chilensis	0	0	0	0	0	0	0	0	0	0	0	0	0	0	0	0	0	0	0	0
DD	Arthropods	2009		Tetracanthagyna brunnea	0	0	0	0	0	0	0	0	0	0	0	0	0	0	0	0	0	0	0	0
DD	Arthropods	2009		Tetragoneuria spinosa	1	0	0	0	0	0	0	0	0	0	0	0	0	0	0	1	0	0	0	0
DD	Arthropods	2010		Tetrathemis denticauda	0	0	0	0	0	0	0	0	0	0	0	0	0	0	0	0	0	0	0	0
DD	Arthropods	2009		Tetrathemis flavescens	0	0	0	0	0	0	0	0	0	0	0	0	0	0	0	0	0	0	0	0
DD	Arthropods	2009		Tetrathemis fraseri	0	0	0	0	0	0	0	0	0	0	0	0	0	0	0	0	0	0	0	0
DD	Arthropods	2010		Tetrathemis ruwensoriensis	0	0	0	0	0	0	0	0	0	0	0	0	0	0	0	0	0	0	0	0
DD	Arthropods	2008		Thaiphusa chantaburiensis	0	0	0	0	0	0	0	0	0	0	0	0	0	0	0	0	0	0	0	0
DD	Arthropods	2008		Thaiphusa tenasserimensis	0	0	0	0	0	0	0	0	0	0	0	0	0	0	0	0	0	0	0	0
DD	Arthropods	2008		Thaipotamon siamense	0	0	0	0	0	0	0	0	0	0	0	0	0	0	0	0	0	0	0	0
DD	Arthropods	2008		Thaipotamon smitinandi	0	0	0	0	0	0	0	0	0	0	0	0	0	0	0	0	0	0	0	0
DD	Arthropods	2008		Thaipotamon varoonphornae	0	0	0	0	0	0	0	0	0	0	0	0	0	0	0	0	0	0	0	0
DD	Arthropods	2010		Thambus frivaldskyi	0	0	0	0	0	0	0	0	0	0	0	0	0	0	0	0	0	0	0	0
DD	Arthropods	2009		Thaumatagrion funereum	0	0	0	0	0	0	0	0	0	0	0	0	0	0	0	0	0	0	0	0
DD	Arthropods	2008		Thelphusula buergeri	0	0	0	0	0	0	0	0	0	0	0	0	0	0	0	0	0	0	0	0
DD	Arthropods	2010		Thymalus oblongus	0	0	0	0	0	0	0	0	0	0	0	0	0	0	0	0	0	0	0	0
DD	Arthropods	2009		Titanosticta macrogaster	0	0	0	0	0	0	0	0	0	0	0	0	0	0	0	0	0	0	0	0
DD	Arthropods	2008		Tiwaripotamon araneum	0	0	0	0	0	0	0	0	0	0	0	0	0	0	0	0	0	0	0	0
DD	Arthropods	2008		Tiwaripotamon austenianum	0	0	0	0	0	0	0	0	0	0	0	0	0	0	0	0	0	0	0	0
DD	Arthropods	2008		Tiwaripotamon pingguoense	0	0	0	0	0	0	0	0	0	0	0	0	0	0	0	0	0	0	0	0
DD	Arthropods	2008		Tiwaripotamon xiurenense	0	0	0	0	0	0	0	0	0	0	0	0	0	0	0	0	0	0	0	0
DD	Arthropods	2008		Torhusa nieuwenhuisi	1	0	1	0	0	0	0	0	0	0	0	0	0	0	0	0	0	0	0	0
DD	Arthropods	2008		Travancoriana napaea	0	0	0	0	0	0	0	0	0	0	0	0	0	0	0	0	0	0	0	0
DD	Arthropods	2008		Travancoriana pollicaris	0	0	0	0	0	0	0	0	0	0	0	0	0	0	0	0	0	0	0	0
DD	Arthropods	2008		Trichodactylus parvus	0	0	0	0	0	0	0	0	0	0	0	0	0	0	0	0	0	0	0	0
DD	Arthropods	2008		Trichopotamon daliense	0	0	0	0	0	0	0	0	0	0	0	0	0	0	0	0	0	0	0	0
DD	Arthropods	2010		Triplax andreinii	0	0	0	0	0	0	0	0	0	0	0	0	0	0	0	0	0	0	0	0
DD	Arthropods	2010		Triplax carpathica	1	0	0	0	0	0	0	0	0	0	0	0	0	0	0	0	1	0	0	0
DD	Arthropods	2010		Triplax cyanescens	0	0	0	0	0	0	0	0	0	0	0	0	0	0	0	0	0	0	0	0
DD	Arthropods	2010		Triplax pygmaea	0	0	0	0	0	0	0	0	0	0	0	0	0	0	0	0	0	0	0	0
DD	Arthropods	2010		Triplax rudis	0	0	0	0	0	0	0	0	0	0	0	0	0	0	0	0	0	0	0	0
DD	Arthropods	2010		Triplax tergestana	0	0	0	0	0	0	0	0	0	0	0	0	0	0	0	0	0	0	0	0
DD	Arthropods	2009		Trithemis fumosa	0	0	0	0	0	0	0	0	0	0	0	0	0	0	0	0	0	0	0	0
DD	Arthropods	2006		Trithemis hartwigi	0	0	0	0	0	0	0	0	0	0	0	0	0	0	0	0	0	0	0	0
DD	Arthropods	2008		Typhlopseudothelphusa acanthochela	0	0	0	0	0	0	0	0	0	0	0	0	0	0	0	0	0	0	0	0
DD	Arthropods	2008		Typhlopseudothelphusa hyba	0	0	0	0	0	0	0	0	0	0	0	0	0	0	0	0	0	0	0	0
DD	Arthropods	2008		Vadosapotamon sheni	0	0	0	0	0	0	0	0	0	0	0	0	0	0	0	0	0	0	0	0
DD	Arthropods	2008		Vanni malabarica	0	0	0	0	0	0	0	0	0	0	0	0	0	0	0	0	0	0	0	0
DD	Arthropods	2008		Vanni nilgiriensis	0	0	0	0	0	0	0	0	0	0	0	0	0	0	0	0	0	0	0	0
DD	Arthropods	2008		Vanni pusilla	0	0	0	0	0	0	0	0	0	0	0	0	0	0	0	0	0	0	0	0
DD	Arthropods	2008		Vanni travancorica	1	0	0	0	0	0	0	0	0	0	0	0	1	0	0	0	0	0	0	0
DD	Arthropods	2009		Vanuatubasis malekulana	1	0	0	0	0	0	0	0	0	0	0	0	0	0	1	0	0	0	0	0
DD	Arthropods	2008		Vela carli	0	0	0	0	0	0	0	0	0	0	0	0	0	0	0	0	0	0	0	0
DD	Arthropods	2008		Vela pulvinata	4	0	0	0	0	0	0	0	0	0	1	0	1	1	0	0	1	0	0	0
DD	Arthropods	2008		Vietopotamon phuluangense	0	0	0	0	0	0	0	0	0	0	0	0	0	0	0	0	0	0	0	0
DD	Arthropods	2008		Villalobosus lopezformenti	0	0	0	0	0	0	0	0	0	0	0	0	0	0	0	0	0	0	0	0
DD	Arthropods	2008		Villopotamon klossianum	0	0	0	0	0	0	0	0	0	0	0	0	0	0	0	0	0	0	0	0
DD	Arthropods	2008		Villopotamon sphaeridium	0	0	0	0	0	0	0	0	0	0	0	0	0	0	0	0	0	0	0	0
DD	Arthropods	2009		Viridithemis viridula	0	0	0	0	0	0	0	0	0	0	0	0	0	0	0	0	0	0	0	0
DD	Arthropods	2010		Virilastacus araucanius	4	0	0	0	0	0	0	0	1	0	1	0	0	0	0	0	0	1	1	0
DD	Arthropods	2009		Xanthocnemis sobrina	0	0	0	0	0	0	0	0	0	0	0	0	0	0	0	0	0	0	0	0
DD	Arthropods	2008		Yarepotamon aflagellum	0	0	0	0	0	0	0	0	0	0	0	0	0	0	0	0	0	0	0	0
DD	Arthropods	2008		Yarepotamon gracillipa	0	0	0	0	0	0	0	0	0	0	0	0	0	0	0	0	0	0	0	0
DD	Arthropods	2008		Zilchia falcata	0	0	0	0	0	0	0	0	0	0	0	0	0	0	0	0	0	0	0	0
DD	Arthropods	2008		Zilchia ivis	0	0	0	0	0	0	0	0	0	0	0	0	0	0	0	0	0	0	0	0
DD	Arthropods	2008		Zilchiopsis cryptodus	0	0	0	0	0	0	0	0	0	0	0	0	0	0	0	0	0	0	0	0
DD	Arthropods	2009		Zonophora regalis	0	0	0	0	0	0	0	0	0	0	0	0	0	0	0	0	0	0	0	0
DD	Arthropods	2009		Zygonyx ilia	0	0	0	0	0	0	0	0	0	0	0	0	0	0	0	0	0	0	0	0
DD	Arthropods	2009		Zygonyx ranavalonae	0	0	0	0	0	0	0	0	0	0	0	0	0	0	0	0	0	0	0	0
DD	Arthropods	2009		Zyxommoides breviventre	0	0	0	0	0	0	0	0	0	0	0	0	0	0	0	0	0	0	0	0
DD	Cnidaria	2008		Acropora akajimensis	0	0	0	0	0	0	0	0	0	0	0	0	0	0	0	0	0	0	0	0
DD	Cnidaria	2008		Acropora bifurcata	0	0	0	0	0	0	0	0	0	0	0	0	0	0	0	0	0	0	0	0
DD	Cnidaria	2008		Acropora branchi	0	0	0	0	0	0	0	0	0	0	0	0	0	0	0	0	0	0	0	0
DD	Cnidaria	2008		Acropora cardenae	0	0	0	0	0	0	0	0	0	0	0	0	0	0	0	0	0	0	0	0
DD	Cnidaria	2008		Acropora convexa	0	0	0	0	0	0	0	0	0	0	0	0	0	0	0	0	0	0	0	0
DD	Cnidaria	2008		Acropora cophodactyla	0	0	0	0	0	0	0	0	0	0	0	0	0	0	0	0	0	0	0	0
DD	Cnidaria	2008		Acropora copiosa	0	0	0	0	0	0	0	0	0	0	0	0	0	0	0	0	0	0	0	0
DD	Cnidaria	2008		Acropora efflorescens	0	0	0	0	0	0	0	0	0	0	0	0	0	0	0	0	0	0	0	0
DD	Cnidaria	2008		Acropora elegantula	0	0	0	0	0	0	0	0	0	0	0	0	0	0	0	0	0	0	0	0
DD	Cnidaria	2008		Acropora exquisita	0	0	0	0	0	0	0	0	0	0	0	0	0	0	0	0	0	0	0	0
DD	Cnidaria	2008		Acropora fastigata	0	0	0	0	0	0	0	0	0	0	0	0	0	0	0	0	0	0	0	0
DD	Cnidaria	2008		Acropora forskali	0	0	0	0	0	0	0	0	0	0	0	0	0	0	0	0	0	0	0	0
DD	Cnidaria	2008		Acropora haimei	0	0	0	0	0	0	0	0	0	0	0	0	0	0	0	0	0	0	0	0
DD	Cnidaria	2008		Acropora inermis	0	0	0	0	0	0	0	0	0	0	0	0	0	0	0	0	0	0	0	0
DD	Cnidaria	2008		Acropora insignis	0	0	0	0	0	0	0	0	0	0	0	0	0	0	0	0	0	0	0	0
DD	Cnidaria	2008		Acropora irregularis	0	0	0	0	0	0	0	0	0	0	0	0	0	0	0	0	0	0	0	0
DD	Cnidaria	2008		Acropora lianae	0	0	0	0	0	0	0	0	0	0	0	0	0	0	0	0	0	0	0	0
DD	Cnidaria	2008		Acropora macrostoma	0	0	0	0	0	0	0	0	0	0	0	0	0	0	0	0	0	0	0	0
DD	Cnidaria	2008		Acropora massawensis	0	0	0	0	0	0	0	0	0	0	0	0	0	0	0	0	0	0	0	0
DD	Cnidaria	2008		Acropora meridiana	0	0	0	0	0	0	0	0	0	0	0	0	0	0	0	0	0	0	0	0
DD	Cnidaria	2008		Acropora mirabilis	0	0	0	0	0	0	0	0	0	0	0	0	0	0	0	0	0	0	0	0
DD	Cnidaria	2008		Acropora natalensis	0	0	0	0	0	0	0	0	0	0	0	0	0	0	0	0	0	0	0	0
DD	Cnidaria	2008		Acropora ocellata	0	0	0	0	0	0	0	0	0	0	0	0	0	0	0	0	0	0	0	0
DD	Cnidaria	2008		Acropora orbicularis	0	0	0	0	0	0	0	0	0	0	0	0	0	0	0	0	0	0	0	0
DD	Cnidaria	2008		Acropora pagoensis	0	0	0	0	0	0	0	0	0	0	0	0	0	0	0	0	0	0	0	0
DD	Cnidaria	2008		Acropora parilis	0	0	0	0	0	0	0	0	0	0	0	0	0	0	0	0	0	0	0	0
DD	Cnidaria	2008		Acropora pinguis	0	0	0	0	0	0	0	0	0	0	0	0	0	0	0	0	0	0	0	0
DD	Cnidaria	2008		Acropora plana	0	0	0	0	0	0	0	0	0	0	0	0	0	0	0	0	0	0	0	0
DD	Cnidaria	2008		Acropora plantaginea	0	0	0	0	0	0	0	0	0	0	0	0	0	0	0	0	0	0	0	0
DD	Cnidaria	2008		Acropora prostrata	0	0	0	0	0	0	0	0	0	0	0	0	0	0	0	0	0	0	0	0
DD	Cnidaria	2008		Acropora pruinosa	4	0	0	0	0	0	0	1	0	1	0	1	0	0	1	0	0	0	0	0
DD	Cnidaria	2008		Acropora rambleri	0	0	0	0	0	0	0	0	0	0	0	0	0	0	0	0	0	0	0	0
DD	Cnidaria	2008		Acropora rosaria	0	0	0	0	0	0	0	0	0	0	0	0	0	0	0	0	0	0	0	0
DD	Cnidaria	2008		Acropora scherzeriana	0	0	0	0	0	0	0	0	0	0	0	0	0	0	0	0	0	0	0	0
DD	Cnidaria	2008		Acropora schmitti	0	0	0	0	0	0	0	0	0	0	0	0	0	0	0	0	0	0	0	0
DD	Cnidaria	2008		Acropora sekiseiensis	0	0	0	0	0	0	0	0	0	0	0	0	0	0	0	0	0	0	0	0
DD	Cnidaria	2008		Acropora seriata	0	0	0	0	0	0	0	0	0	0	0	0	0	0	0	0	0	0	0	0
DD	Cnidaria	2008		Acropora stoddarti	0	0	0	0	0	0	0	0	0	0	0	0	0	0	0	0	0	0	0	0
DD	Cnidaria	2008		Acropora tanegashimensis	0	0	0	0	0	0	0	0	0	0	0	0	0	0	0	0	0	0	0	0
DD	Cnidaria	2008		Acropora teres	1	0	0	0	0	0	0	0	0	0	0	0	0	1	0	0	0	0	0	0
DD	Cnidaria	2008		Acropora tizardi	0	0	0	0	0	0	0	0	0	0	0	0	0	0	0	0	0	0	0	0
DD	Cnidaria	2008		Acropora torihalimeda	0	0	0	0	0	0	0	0	0	0	0	0	0	0	0	0	0	0	0	0
DD	Cnidaria	2008		Acropora tumida	0	0	0	0	0	0	0	0	0	0	0	0	0	0	0	0	0	0	0	0
DD	Cnidaria	2008		Acropora tutuilensis	0	0	0	0	0	0	0	0	0	0	0	0	0	0	0	0	0	0	0	0
DD	Cnidaria	2008		Acropora variabilis	1	0	1	0	0	0	0	0	0	0	0	0	0	0	0	0	0	0	0	0
DD	Cnidaria	2008		Acropora vermiculata	0	0	0	0	0	0	0	0	0	0	0	0	0	0	0	0	0	0	0	0
DD	Cnidaria	2008		Acropora wallaceae	0	0	0	0	0	0	0	0	0	0	0	0	0	0	0	0	0	0	0	0
DD	Cnidaria	2008		Agaricia fragilis	4	0	0	0	0	0	0	0	0	0	0	1	0	0	1	1	0	0	0	1
DD	Cnidaria	2008		Agaricia undata	0	0	0	0	0	0	0	0	0	0	0	0	0	0	0	0	0	0	0	0
DD	Cnidaria	2008		Alveopora ocellata	0	0	0	0	0	0	0	0	0	0	0	0	0	0	0	0	0	0	0	0
DD	Cnidaria	2008		Astreopora eliptica	0	0	0	0	0	0	0	0	0	0	0	0	0	0	0	0	0	0	0	0
DD	Cnidaria	2008	2015	Balanophyllia europaea	24	0	0	1	0	1	0	1	0	3	1	1	1	1	1	0	2	4	1	6
DD	Cnidaria	2008		Boninastrea boninensis	0	0	0	0	0	0	0	0	0	0	0	0	0	0	0	0	0	0	0	0
DD	Cnidaria	2007		Caryophyllia solida	0	0	0	0	0	0	0	0	0	0	0	0	0	0	0	0	0	0	0	0
DD	Cnidaria	2008	2015	Cladocora caespitosa	65	1	0	1	1	0	1	3	4	1	3	3	4	7	3	5	7	5	6	10
DD	Cnidaria	2007		Concentrotheca vaughani	0	0	0	0	0	0	0	0	0	0	0	0	0	0	0	0	0	0	0	0
DD	Cnidaria	2007		Crispatotrochus galapagensis	0	0	0	0	0	0	0	0	0	0	0	0	0	0	0	0	0	0	0	0
DD	Cnidaria	2007		Dendrophyllia johnsoni	0	0	0	0	0	0	0	0	0	0	0	0	0	0	0	0	0	0	0	0
DD	Cnidaria	2008		Dichocoenia stellaris	1	0	0	0	0	0	1	0	0	0	0	0	0	0	0	0	0	0	0	0
DD	Cnidaria	2007		Endopsammia pourtalesi	0	0	0	0	0	0	0	0	0	0	0	0	0	0	0	0	0	0	0	0
DD	Cnidaria	2008		Favia leptophylla	2	0	0	0	0	0	0	0	0	0	0	0	1	1	0	0	0	0	0	0
DD	Cnidaria	2007		Flabellum daphnense	0	0	0	0	0	0	0	0	0	0	0	0	0	0	0	0	0	0	0	0
DD	Cnidaria	2008		Indophyllia macassarensis	0	0	0	0	0	0	0	0	0	0	0	0	0	0	0	0	0	0	0	0
DD	Cnidaria	2008		Madracis asanoi	0	0	0	0	0	0	0	0	0	0	0	0	0	0	0	0	0	0	0	0
DD	Cnidaria	2008		Madracis asperula	0	0	0	0	0	0	0	0	0	0	0	0	0	0	0	0	0	0	0	0
DD	Cnidaria	2008		Meandrina braziliensis	0	0	0	0	0	0	0	0	0	0	0	0	0	0	0	0	0	0	0	0
DD	Cnidaria	2008		Millepora braziliensis	2	0	0	0	0	0	0	0	0	0	0	0	0	1	1	0	0	0	0	0
DD	Cnidaria	2008		Millepora nitida	1	0	0	0	0	0	0	0	0	0	0	0	0	1	0	0	0	0	0	0
DD	Cnidaria	2008		Montigyra kenti	0	0	0	0	0	0	0	0	0	0	0	0	0	0	0	0	0	0	0	0
DD	Cnidaria	2008		Montipora vaughani	0	0	0	0	0	0	0	0	0	0	0	0	0	0	0	0	0	0	0	0
DD	Cnidaria	2008		Montipora verrilli	0	0	0	0	0	0	0	0	0	0	0	0	0	0	0	0	0	0	0	0
DD	Cnidaria	2008		Mussismilia braziliensis	15	0	0	0	0	0	1	0	0	0	1	0	0	1	1	3	2	2	3	1
DD	Cnidaria	2008		Mussismilia harttii	5	0	0	0	0	0	0	0	0	0	1	0	0	0	0	0	0	2	0	2
DD	Cnidaria	2008		Mussismilia hispida	26	0	0	0	0	1	2	2	2	1	0	2	0	1	3	3	3	1	4	1
DD	Cnidaria	2008		Mycetophyllia reesi	6	1	0	0	0	0	3	2	0	0	0	0	0	0	0	0	0	0	0	0
DD	Cnidaria	2008		Oculina robusta	0	0	0	0	0	0	0	0	0	0	0	0	0	0	0	0	0	0	0	0
DD	Cnidaria	2008		Oculina tenella	0	0	0	0	0	0	0	0	0	0	0	0	0	0	0	0	0	0	0	0
DD	Cnidaria	2008		Oculina valenciennesi	0	0	0	0	0	0	0	0	0	0	0	0	0	0	0	0	0	0	0	0
DD	Cnidaria	2008		Pavona xarifae	0	0	0	0	0	0	0	0	0	0	0	0	0	0	0	0	0	0	0	0
DD	Cnidaria	2008		Pocillopora molokensis	1	0	0	0	0	0	0	0	0	0	0	0	0	0	0	1	0	0	0	0
DD	Cnidaria	2008		Porites baueri	1	0	0	0	0	0	0	0	0	0	0	1	0	0	0	0	0	0	0	0
DD	Cnidaria	2008		Porites colonensis	0	0	0	0	0	0	0	0	0	0	0	0	0	0	0	0	0	0	0	0
DD	Cnidaria	2008		Porites evermanni	3	0	0	0	0	1	0	0	0	0	0	0	0	1	0	0	0	0	0	1
DD	Cnidaria	2008		Psammocora decussata	0	0	0	0	0	0	0	0	0	0	0	0	0	0	0	0	0	0	0	0
DD	Cnidaria	2008		Psammocora verrilli	0	0	0	0	0	0	0	0	0	0	0	0	0	0	0	0	0	0	0	0
DD	Cnidaria	2007		Pseudocyathoceras avis	0	0	0	0	0	0	0	0	0	0	0	0	0	0	0	0	0	0	0	0
DD	Cnidaria	2008		Schizoculina africana	0	0	0	0	0	0	0	0	0	0	0	0	0	0	0	0	0	0	0	0
DD	Cnidaria	2008		Schizoculina fissipara	0	0	0	0	0	0	0	0	0	0	0	0	0	0	0	0	0	0	0	0
DD	Cnidaria	2008		Scolymia wellsi	0	0	0	0	0	0	0	0	0	0	0	0	0	0	0	0	0	0	0	0
DD	Cnidaria	2008		Siderastrea stellata	25	0	0	0	0	1	1	0	3	2	0	4	1	2	1	2	3	1	1	3
DD	Cnidaria	2008		Simplastrea vesicularis	0	0	0	0	0	0	0	0	0	0	0	0	0	0	0	0	0	0	0	0
DD	Cnidaria	2008		Stylaraea punctata	1	0	0	0	0	0	0	0	0	0	0	0	1	0	0	0	0	0	0	0
DD	Molluscs	2010		Alzoniella pyrenaica	0	0	0	0	0	0	0	0	0	0	0	0	0	0	0	0	0	0	0	0
DD	Molluscs	2010		Anceya terebriformis	0	0	0	0	0	0	0	0	0	0	0	0	0	0	0	0	0	0	0	0
DD	Molluscs	2010		Ancylus regularis	0	0	0	0	0	0	0	0	0	0	0	0	0	0	0	0	0	0	0	0
DD	Molluscs	2009		Aspatharia droueti	0	0	0	0	0	0	0	0	0	0	0	0	0	0	0	0	0	0	0	0
DD	Molluscs	2010		Aspatharia marnoi	0	0	0	0	0	0	0	0	0	0	0	0	0	0	0	0	0	0	0	0
DD	Molluscs	2010		Aspatharia subreniformis	1	0	0	0	0	0	0	0	0	0	0	1	0	0	0	0	0	0	0	0
DD	Molluscs	2010		Assiminea hessei	0	0	0	0	0	0	0	0	0	0	0	0	0	0	0	0	0	0	0	0
DD	Molluscs	2010		Assiminea hungerfordiana	0	0	0	0	0	0	0	0	0	0	0	0	0	0	0	0	0	0	0	0
DD	Molluscs	2010		Assiminea keniana	0	0	0	0	0	0	0	0	0	0	0	0	0	0	0	0	0	0	0	0
DD	Molluscs	2010		Auriculodes gaziensis	0	0	0	0	0	0	0	0	0	0	0	0	0	0	0	0	0	0	0	0
DD	Molluscs	2010		Avenionia bourguignati	0	0	0	0	0	0	0	0	0	0	0	0	0	0	0	0	0	0	0	0
DD	Molluscs	2010		Belgrandia bigorrensis	0	0	0	0	0	0	0	0	0	0	0	0	0	0	0	0	0	0	0	0
DD	Molluscs	2010		Belgrandia cazioti	0	0	0	0	0	0	0	0	0	0	0	0	0	0	0	0	0	0	0	0
DD	Molluscs	2010		Belgrandia coutagnei	0	0	0	0	0	0	0	0	0	0	0	0	0	0	0	0	0	0	0	0
DD	Molluscs	2010		Belgrandia minuscula	0	0	0	0	0	0	0	0	0	0	0	0	0	0	0	0	0	0	0	0
DD	Molluscs	2010		Belgrandiella koprivnensis	0	0	0	0	0	0	0	0	0	0	0	0	0	0	0	0	0	0	0	0
DD	Molluscs	2010		Belgrandiella kuesteri	2	0	0	0	0	0	0	0	1	0	0	1	0	0	0	0	0	0	0	0
DD	Molluscs	2010		Belgrandiella kusceri	0	0	0	0	0	0	0	0	0	0	0	0	0	0	0	0	0	0	0	0
DD	Molluscs	2010		Belgrandiella nana	0	0	0	0	0	0	0	0	0	0	0	0	0	0	0	0	0	0	0	0
DD	Molluscs	2010		Belgrandiella novoselensis	0	0	0	0	0	0	0	0	0	0	0	0	0	0	0	0	0	0	0	0
DD	Molluscs	2010		Belgrandiella pageti	0	0	0	0	0	0	0	0	0	0	0	0	0	0	0	0	0	0	0	0
DD	Molluscs	2010		Belgrandiella robusta	0	0	0	0	0	0	0	0	0	0	0	0	0	0	0	0	0	0	0	0
DD	Molluscs	2010		Belgrandiella seminium	0	0	0	0	0	0	0	0	0	0	0	0	0	0	0	0	0	0	0	0
DD	Molluscs	2010		Bellamya crassispiralis	0	0	0	0	0	0	0	0	0	0	0	0	0	0	0	0	0	0	0	0
DD	Molluscs	2004		Bellamya ecclesi	0	0	0	0	0	0	0	0	0	0	0	0	0	0	0	0	0	0	0	0
DD	Molluscs	2004		Bellamya jeffreysi	0	0	0	0	0	0	0	0	0	0	0	0	0	0	0	0	0	0	0	0
DD	Molluscs	2010		Bellamya leopoldvillensis	0	0	0	0	0	0	0	0	0	0	0	0	0	0	0	0	0	0	0	0
DD	Molluscs	2010		Bellamya micron	0	0	0	0	0	0	0	0	0	0	0	0	0	0	0	0	0	0	0	0
DD	Molluscs	2010		Bellamya trochlearis	0	0	0	0	0	0	0	0	0	0	0	0	0	0	0	0	0	0	0	0
DD	Molluscs	2010		Biomphalaria barthi	0	0	0	0	0	0	0	0	0	0	0	0	0	0	0	0	0	0	0	0
DD	Molluscs	2007		Biomphalaria rhodesiensis	0	0	0	0	0	0	0	0	0	0	0	0	0	0	0	0	0	0	0	0
DD	Molluscs	2007		Biomphalaria salinarum	0	0	0	0	0	0	0	0	0	0	0	0	0	0	0	0	0	0	0	0
DD	Molluscs	2010		Biomphalaria stanleyi	5	0	0	0	0	0	0	0	0	0	0	1	2	1	0	1	0	0	0	0
DD	Molluscs	2010		Bithynia boissieri	0	0	0	0	0	0	0	0	0	0	0	0	0	0	0	0	0	0	0	0
DD	Molluscs	2010		Bithynia montenegrina	0	0	0	0	0	0	0	0	0	0	0	0	0	0	0	0	0	0	0	0
DD	Molluscs	2010		Bithynia textum	0	0	0	0	0	0	0	0	0	0	0	0	0	0	0	0	0	0	0	0
DD	Molluscs	2004		Bridouxia smithiana	0	0	0	0	0	0	0	0	0	0	0	0	0	0	0	0	0	0	0	0
DD	Molluscs	2003		Bulimulus albermalensis	0	0	0	0	0	0	0	0	0	0	0	0	0	0	0	0	0	0	0	0
DD	Molluscs	2003		Bulimulus elaeodes	0	0	0	0	0	0	0	0	0	0	0	0	0	0	0	0	0	0	0	0
DD	Molluscs	2003		Bulimulus hemaerodes	0	0	0	0	0	0	0	0	0	0	0	0	0	0	0	0	0	0	0	0
DD	Molluscs	2003		Bulimulus nucula	0	0	0	0	0	0	0	0	0	0	0	0	0	0	0	0	0	0	0	0
DD	Molluscs	2003		Bulimulus pallidus	0	0	0	0	0	0	0	0	0	0	0	0	0	0	0	0	0	0	0	0
DD	Molluscs	2003		Bulimulus rugatinus	0	0	0	0	0	0	0	0	0	0	0	0	0	0	0	0	0	0	0	0
DD	Molluscs	2003		Bulimulus rugiferus	0	0	0	0	0	0	0	0	0	0	0	0	0	0	0	0	0	0	0	0
DD	Molluscs	2003		Bulimulus simrothi	0	0	0	0	0	0	0	0	0	0	0	0	0	0	0	0	0	0	0	0
DD	Molluscs	2003		Bulimulus trogonius	0	0	0	0	0	0	0	0	0	0	0	0	0	0	0	0	0	0	0	0
DD	Molluscs	2004		Bulinus barthi	0	0	0	0	0	0	0	0	0	0	0	0	0	0	0	0	0	0	0	0
DD	Molluscs	2010		Bulinus browni	0	0	0	0	0	0	0	0	0	0	0	0	0	0	0	0	0	0	0	0
DD	Molluscs	2010		Bulinus crystallinus	0	0	0	0	0	0	0	0	0	0	0	0	0	0	0	0	0	0	0	0
DD	Molluscs	2010		Bulinus hexaploidus	0	0	0	0	0	0	0	0	0	0	0	0	0	0	0	0	0	0	0	0
DD	Molluscs	2010		Bulinus octoploidus	0	0	0	0	0	0	0	0	0	0	0	0	0	0	0	0	0	0	0	0
DD	Molluscs	2010		Bulinus permembranaceus	0	0	0	0	0	0	0	0	0	0	0	0	0	0	0	0	0	0	0	0
DD	Molluscs	2010		Bulinus transversalis	0	0	0	0	0	0	0	0	0	0	0	0	0	0	0	0	0	0	0	0
DD	Molluscs	2010		Burnupia alta	0	0	0	0	0	0	0	0	0	0	0	0	0	0	0	0	0	0	0	0
DD	Molluscs	2007		Burnupia brunnea	0	0	0	0	0	0	0	0	0	0	0	0	0	0	0	0	0	0	0	0
DD	Molluscs	2010		Burnupia caffra	0	0	0	0	0	0	0	0	0	0	0	0	0	0	0	0	0	0	0	0
DD	Molluscs	2007		Burnupia capensis	0	0	0	0	0	0	0	0	0	0	0	0	0	0	0	0	0	0	0	0
DD	Molluscs	2010		Burnupia edwardiana	0	0	0	0	0	0	0	0	0	0	0	0	0	0	0	0	0	0	0	0
DD	Molluscs	2007		Burnupia farquhari	0	0	0	0	0	0	0	0	0	0	0	0	0	0	0	0	0	0	0	0
DD	Molluscs	2007		Burnupia gordonensis	0	0	0	0	0	0	0	0	0	0	0	0	0	0	0	0	0	0	0	0
DD	Molluscs	2010		Burnupia kempi	0	0	0	0	0	0	0	0	0	0	0	0	0	0	0	0	0	0	0	0
DD	Molluscs	2010		Burnupia kimiloloensis	0	0	0	0	0	0	0	0	0	0	0	0	0	0	0	0	0	0	0	0
DD	Molluscs	2007		Burnupia mooiensis	0	0	0	0	0	0	0	0	0	0	0	0	0	0	0	0	0	0	0	0
DD	Molluscs	2007		Burnupia nana	0	0	0	0	0	0	0	0	0	0	0	0	0	0	0	0	0	0	0	0
DD	Molluscs	2007		Burnupia obtusata	0	0	0	0	0	0	0	0	0	0	0	0	0	0	0	0	0	0	0	0
DD	Molluscs	2007		Burnupia ponsonbyi	0	0	0	0	0	0	0	0	0	0	0	0	0	0	0	0	0	0	0	0
DD	Molluscs	2007		Burnupia stenochorias	5	0	0	3	0	0	0	0	0	1	0	0	0	1	0	0	0	0	0	0
DD	Molluscs	2007		Burnupia transvaalensis	0	0	0	0	0	0	0	0	0	0	0	0	0	0	0	0	0	0	0	0
DD	Molluscs	2007		Burnupia trapezoidea	0	0	0	0	0	0	0	0	0	0	0	0	0	0	0	0	0	0	0	0
DD	Molluscs	2007		Burnupia verreauxi	0	0	0	0	0	0	0	0	0	0	0	0	0	0	0	0	0	0	0	0
DD	Molluscs	2007		Burnupia vulcanus	0	0	0	0	0	0	0	0	0	0	0	0	0	0	0	0	0	0	0	0
DD	Molluscs	2010		Burnupia walkeri	0	0	0	0	0	0	0	0	0	0	0	0	0	0	0	0	0	0	0	0
DD	Molluscs	2010		Bythinella abbreviata	0	0	0	0	0	0	0	0	0	0	0	0	0	0	0	0	0	0	0	0
DD	Molluscs	2010		Bythinella cylindracea	0	0	0	0	0	0	0	0	0	0	0	0	0	0	0	0	0	0	0	0
DD	Molluscs	2010		Bythinella darrieuxii	0	0	0	0	0	0	0	0	0	0	0	0	0	0	0	0	0	0	0	0
DD	Molluscs	2010		Bythinella ligurica	0	0	0	0	0	0	0	0	0	0	0	0	0	0	0	0	0	0	0	0
DD	Molluscs	2010		Bythinella nothites	0	0	0	0	0	0	0	0	0	0	0	0	0	0	0	0	0	0	0	0
DD	Molluscs	2010		Bythinella pyrenaica	0	0	0	0	0	0	0	0	0	0	0	0	0	0	0	0	0	0	0	0
DD	Molluscs	2010		Bythinella samecana	0	0	0	0	0	0	0	0	0	0	0	0	0	0	0	0	0	0	0	0
DD	Molluscs	2010		Bythinella servainiana	0	0	0	0	0	0	0	0	0	0	0	0	0	0	0	0	0	0	0	0
DD	Molluscs	2010		Bythinella sordida	0	0	0	0	0	0	0	0	0	0	0	0	0	0	0	0	0	0	0	0
DD	Molluscs	2010		Bythinella turriculata	0	0	0	0	0	0	0	0	0	0	0	0	0	0	0	0	0	0	0	0
DD	Molluscs	2010		Bythiospeum excelsior	0	0	0	0	0	0	0	0	0	0	0	0	0	0	0	0	0	0	0	0
DD	Molluscs	2010		Bythiospeum excessum	0	0	0	0	0	0	0	0	0	0	0	0	0	0	0	0	0	0	0	0
DD	Molluscs	2010		Bythiospeum michaudi	0	0	0	0	0	0	0	0	0	0	0	0	0	0	0	0	0	0	0	0
DD	Molluscs	2010		Bythiospeum moussonianum	0	0	0	0	0	0	0	0	0	0	0	0	0	0	0	0	0	0	0	0
DD	Molluscs	2010		Bythiospeum racovitzai	0	0	0	0	0	0	0	0	0	0	0	0	0	0	0	0	0	0	0	0
DD	Molluscs	2010		Bythiospeum terveri	0	0	0	0	0	0	0	0	0	0	0	0	0	0	0	0	0	0	0	0
DD	Molluscs	2010		Camptoceras austeni	0	0	0	0	0	0	0	0	0	0	0	0	0	0	0	0	0	0	0	0
DD	Molluscs	2010		Camptoceras terebra	0	0	0	0	0	0	0	0	0	0	0	0	0	0	0	0	0	0	0	0
DD	Molluscs	2010		Ceratophallus apertus	0	0	0	0	0	0	0	0	0	0	0	0	0	0	0	0	0	0	0	0
DD	Molluscs	2010		Ceratophallus blanfordi	0	0	0	0	0	0	0	0	0	0	0	0	0	0	0	0	0	0	0	0
DD	Molluscs	2010		Ceratophallus faini	0	0	0	0	0	0	0	0	0	0	0	0	0	0	0	0	0	0	0	0
DD	Molluscs	2010		Ceratophallus subtilis	0	0	0	0	0	0	0	0	0	0	0	0	0	0	0	0	0	0	0	0
DD	Molluscs	2010		Chambardia trapezia	0	0	0	0	0	0	0	0	0	0	0	0	0	0	0	0	0	0	0	0
DD	Molluscs	2010		Cilgia dalmatica	0	0	0	0	0	0	0	0	0	0	0	0	0	0	0	0	0	0	0	0
DD	Molluscs	2004		Cleopatra guillemei	0	0	0	0	0	0	0	0	0	0	0	0	0	0	0	0	0	0	0	0
DD	Molluscs	2010		Cleopatra hemmingi	0	0	0	0	0	0	0	0	0	0	0	0	0	0	0	0	0	0	0	0
DD	Molluscs	2010		Cleopatra langi	0	0	0	0	0	0	0	0	0	0	0	0	0	0	0	0	0	0	0	0
DD	Molluscs	2000	2013	Codringtonia codringtonii	0	0	0	0	0	0	0	0	0	0	0	0	0	0	0	0	0	0	0	0
DD	Molluscs	2004		Coelatura alluaudi	0	0	0	0	0	0	0	0	0	0	0	0	0	0	0	0	0	0	0	0
DD	Molluscs	2010		Coelatura choziensis	1	0	0	0	0	0	0	0	0	0	0	0	0	0	0	0	0	0	0	1
DD	Molluscs	2004		Coelatura cridlandi	0	0	0	0	0	0	0	0	0	0	0	0	0	0	0	0	0	0	0	0
DD	Molluscs	2010		Coelatura kipopoensis	0	0	0	0	0	0	0	0	0	0	0	0	0	0	0	0	0	0	0	0
DD	Molluscs	2004		Coelatura ratidota	0	0	0	0	0	0	0	0	0	0	0	0	0	0	0	0	0	0	0	0
DD	Molluscs	2010		Corbicula sylhetica	0	0	0	0	0	0	0	0	0	0	0	0	0	0	0	0	0	0	0	0
DD	Molluscs	2010		Egeria kockii	0	0	0	0	0	0	0	0	0	0	0	0	0	0	0	0	0	0	0	0
DD	Molluscs	2010		Egeria schwabi	0	0	0	0	0	0	0	0	0	0	0	0	0	0	0	0	0	0	0	0
DD	Molluscs	2010		Egeria tenuicula	0	0	0	0	0	0	0	0	0	0	0	0	0	0	0	0	0	0	0	0
DD	Molluscs	2000		Elliptio waltoni	0	0	0	0	0	0	0	0	0	0	0	0	0	0	0	0	0	0	0	0
DD	Molluscs	2010		Eussoia aethiopica	0	0	0	0	0	0	0	0	0	0	0	0	0	0	0	0	0	0	0	0
DD	Molluscs	2007		Eussoia leptodonta	0	0	0	0	0	0	0	0	0	0	0	0	0	0	0	0	0	0	0	0
DD	Molluscs	2010		Eussoia oblonga	0	0	0	0	0	0	0	0	0	0	0	0	0	0	0	0	0	0	0	0
DD	Molluscs	2007		Ferrissia burnupi	0	0	0	0	0	0	0	0	0	0	0	0	0	0	0	0	0	0	0	0
DD	Molluscs	2007		Ferrissia cawstoni	0	0	0	0	0	0	0	0	0	0	0	0	0	0	0	0	0	0	0	0
DD	Molluscs	2010		Ferrissia ceylanica	0	0	0	0	0	0	0	0	0	0	0	0	0	0	0	0	0	0	0	0
DD	Molluscs	2010		Ferrissia chudeaui	0	0	0	0	0	0	0	0	0	0	0	0	0	0	0	0	0	0	0	0
DD	Molluscs	2010		Ferrissia clessiniana	2	0	0	0	0	0	0	0	0	0	0	1	0	0	0	0	0	0	0	1
DD	Molluscs	2007		Ferrissia clifdeni	0	0	0	0	0	0	0	0	0	0	0	0	0	0	0	0	0	0	0	0
DD	Molluscs	2007		Ferrissia connollyi	0	0	0	0	0	0	0	0	0	0	0	0	0	0	0	0	0	0	0	0
DD	Molluscs	2010		Ferrissia eburnensis	0	0	0	0	0	0	0	0	0	0	0	0	0	0	0	0	0	0	0	0
DD	Molluscs	2007		Ferrissia farquhari	0	0	0	0	0	0	0	0	0	0	0	0	0	0	0	0	0	0	0	0
DD	Molluscs	2007		Ferrissia fontinalis	0	0	0	0	0	0	0	0	0	0	0	0	0	0	0	0	0	0	0	0
DD	Molluscs	2007		Ferrissia junodi	0	0	0	0	0	0	0	0	0	0	0	0	0	0	0	0	0	0	0	0
DD	Molluscs	2007		Ferrissia lacustris	0	0	0	0	0	0	0	0	0	0	0	0	0	0	0	0	0	0	0	0
DD	Molluscs	2009		Ferrissia leonensis	0	0	0	0	0	0	0	0	0	0	0	0	0	0	0	0	0	0	0	0
DD	Molluscs	2010		Ferrissia lhotelleriei	0	0	0	0	0	0	0	0	0	0	0	0	0	0	0	0	0	0	0	0
DD	Molluscs	2007		Ferrissia natalensis	0	0	0	0	0	0	0	0	0	0	0	0	0	0	0	0	0	0	0	0
DD	Molluscs	2010		Ferrissia pallaryi	0	0	0	0	0	0	0	0	0	0	0	0	0	0	0	0	0	0	0	0
DD	Molluscs	2007		Ferrissia victoriensis	0	0	0	0	0	0	0	0	0	0	0	0	0	0	0	0	0	0	0	0
DD	Molluscs	2010		Ferrissia viola	0	0	0	0	0	0	0	0	0	0	0	0	0	0	0	0	0	0	0	0
DD	Molluscs	2007		Ferrissia zambesiensis	0	0	0	0	0	0	0	0	0	0	0	0	0	0	0	0	0	0	0	0
DD	Molluscs	2010		Ferrissia zambiensis	0	0	0	0	0	0	0	0	0	0	0	0	0	0	0	0	0	0	0	0
DD	Molluscs	2004		Gabbiella balovalensis	0	0	0	0	0	0	0	0	0	0	0	0	0	0	0	0	0	0	0	0
DD	Molluscs	2010		Gabbiella kichwambae	0	0	0	0	0	0	0	0	0	0	0	0	0	0	0	0	0	0	0	0
DD	Molluscs	2010		Gabbiella neumanni	0	0	0	0	0	0	0	0	0	0	0	0	0	0	0	0	0	0	0	0
DD	Molluscs	2010		Gabbiella walleri	0	0	0	0	0	0	0	0	0	0	0	0	0	0	0	0	0	0	0	0
DD	Molluscs	2007		Gabbiella zambica	0	0	0	0	0	0	0	0	0	0	0	0	0	0	0	0	0	0	0	0
DD	Molluscs	2010		Graziana vrbasensis	0	0	0	0	0	0	0	0	0	0	0	0	0	0	0	0	0	0	0	0
DD	Molluscs	2010		Gyraulus velifer	0	0	0	0	0	0	0	0	0	0	0	0	0	0	0	0	0	0	0	0
DD	Molluscs	2010		Hadziella thermalis	0	0	0	0	0	0	0	0	0	0	0	0	0	0	0	0	0	0	0	0
DD	Molluscs	2010		Hauffenia edlaueri	0	0	0	0	0	0	0	0	0	0	0	0	0	0	0	0	0	0	0	0
DD	Molluscs	2010		Hauffenia erythropomatia	0	0	0	0	0	0	0	0	0	0	0	0	0	0	0	0	0	0	0	0
DD	Molluscs	2010		Heideella dolichia	0	0	0	0	0	0	0	0	0	0	0	0	0	0	0	0	0	0	0	0
DD	Molluscs	2010		Heleobia arenaria	0	0	0	0	0	0	0	0	0	0	0	0	0	0	0	0	0	0	0	0
DD	Molluscs	2010		Hydrobia cattaroensis	0	0	0	0	0	0	0	0	0	0	0	0	0	0	0	0	0	0	0	0
DD	Molluscs	2010		Hydrobia declinata	0	0	0	0	0	0	0	0	0	0	0	0	0	0	0	0	0	0	0	0
DD	Molluscs	2010		Hydrobia elachista	0	0	0	0	0	0	0	0	0	0	0	0	0	0	0	0	0	0	0	0
DD	Molluscs	2010		Hydrobia gabonensis	0	0	0	0	0	0	0	0	0	0	0	0	0	0	0	0	0	0	0	0
DD	Molluscs	2009		Hydrobia lineata	0	0	0	0	0	0	0	0	0	0	0	0	0	0	0	0	0	0	0	0
DD	Molluscs	2010		Hydrobia montenegrina	0	0	0	0	0	0	0	0	0	0	0	0	0	0	0	0	0	0	0	0
DD	Molluscs	2010		Hydrobia sordida	0	0	0	0	0	0	0	0	0	0	0	0	0	0	0	0	0	0	0	0
DD	Molluscs	2010		Hydrobioides turrita	0	0	0	0	0	0	0	0	0	0	0	0	0	0	0	0	0	0	0	0
DD	Molluscs	2010		Iglica bosnica	0	0	0	0	0	0	0	0	0	0	0	0	0	0	0	0	0	0	0	0
DD	Molluscs	2010		Iglica eximia	0	0	0	0	0	0	0	0	0	0	0	0	0	0	0	0	0	0	0	0
DD	Molluscs	2000	2009	Imperturbatia violescens	0	0	0	0	0	0	0	0	0	0	0	0	0	0	0	0	0	0	0	0
DD	Molluscs	2010		Iravadia princeps	0	0	0	0	0	0	0	0	0	0	0	0	0	0	0	0	0	0	0	0
DD	Molluscs	2010		Islamia bourguignati	0	0	0	0	0	0	0	0	0	0	0	0	0	0	0	0	0	0	0	0
DD	Molluscs	2010		Islamia valvataeformis	0	0	0	0	0	0	0	0	0	0	0	0	0	0	0	0	0	0	0	0
DD	Molluscs	2010		Jubaia excentrica	0	0	0	0	0	0	0	0	0	0	0	0	0	0	0	0	0	0	0	0
DD	Molluscs	2010		Laemodonta amplicata	0	0	0	0	0	0	0	0	0	0	0	0	0	0	0	0	0	0	0	0
DD	Molluscs	2010		Laemodonta oblonga	0	0	0	0	0	0	0	0	0	0	0	0	0	0	0	0	0	0	0	0
DD	Molluscs	2010		Lanistes nasutus	0	0	0	0	0	0	0	0	0	0	0	0	0	0	0	0	0	0	0	0
DD	Molluscs	2010		Lanzaia bosnica	0	0	0	0	0	0	0	0	0	0	0	0	0	0	0	0	0	0	0	0
DD	Molluscs	2010		Lanzaia edlaueri	0	0	0	0	0	0	0	0	0	0	0	0	0	0	0	0	0	0	0	0
DD	Molluscs	2010		Lithoglyphus prasinus	0	0	0	0	0	0	0	0	0	0	0	0	0	0	0	0	0	0	0	0
DD	Molluscs	2010		Lobogenes michaelis	0	0	0	0	0	0	0	0	0	0	0	0	0	0	0	0	0	0	0	0
DD	Molluscs	2010		Lyhnidia sublitoralis	0	0	0	0	0	0	0	0	0	0	0	0	0	0	0	0	0	0	0	0
DD	Molluscs	2010		Lymnaea biacuminata	0	0	0	0	0	0	0	0	0	0	0	0	0	0	0	0	0	0	0	0
DD	Molluscs	2010		Lymnaea horae	0	0	0	0	0	0	0	0	0	0	0	0	0	0	0	0	0	0	0	0
DD	Molluscs	2010		Lymnaea shanensis	0	0	0	0	0	0	0	0	0	0	0	0	0	0	0	0	0	0	0	0
DD	Molluscs	2010		Martelia dautzenbergi	0	0	0	0	0	0	0	0	0	0	0	0	0	0	0	0	0	0	0	0
DD	Molluscs	2010		Melampus massauensis	0	0	0	0	0	0	0	0	0	0	0	0	0	0	0	0	0	0	0	0
DD	Molluscs	2010		Melanoides angolensis	0	0	0	0	0	0	0	0	0	0	0	0	0	0	0	0	0	0	0	0
DD	Molluscs	2010		Melanoides bavayi	0	0	0	0	0	0	0	0	0	0	0	0	0	0	0	0	0	0	0	0
DD	Molluscs	2010		Melanoides liebrechtsi	0	0	0	0	0	0	0	0	0	0	0	0	0	0	0	0	0	0	0	0
DD	Molluscs	2010		Melanoides magnifica	0	0	0	0	0	0	0	0	0	0	0	0	0	0	0	0	0	0	0	0
DD	Molluscs	2009		Melanoides manguensis	0	0	0	0	0	0	0	0	0	0	0	0	0	0	0	0	0	0	0	0
DD	Molluscs	2004		Melanoides nodicincta	0	0	0	0	0	0	0	0	0	0	0	0	0	0	0	0	0	0	0	0
DD	Molluscs	2010		Melanoides nyangweensis	0	0	0	0	0	0	0	0	0	0	0	0	0	0	0	0	0	0	0	0
DD	Molluscs	2004		Melanoides nyassana	0	0	0	0	0	0	0	0	0	0	0	0	0	0	0	0	0	0	0	0
DD	Molluscs	2004		Melanoides pergracilis	0	0	0	0	0	0	0	0	0	0	0	0	0	0	0	0	0	0	0	0
DD	Molluscs	2010		Melanopsis arbalensis	0	0	0	0	0	0	0	0	0	0	0	0	0	0	0	0	0	0	0	0
DD	Molluscs	2010		Melanopsis turgida	0	0	0	0	0	0	0	0	0	0	0	0	0	0	0	0	0	0	0	0
DD	Molluscs	2010		Mercuria perforata	0	0	0	0	0	0	0	0	0	0	0	0	0	0	0	0	0	0	0	0
DD	Molluscs	2010		Moitessieria bourguignati	0	0	0	0	0	0	0	0	0	0	0	0	0	0	0	0	0	0	0	0
DD	Molluscs	2010		Moncetia anceyi	0	0	0	0	0	0	0	0	0	0	0	0	0	0	0	0	0	0	0	0
DD	Molluscs	2010		Mutela bourguignati	0	0	0	0	0	0	0	0	0	0	0	0	0	0	0	0	0	0	0	0
DD	Molluscs	2009		Mutela ovata	0	0	0	0	0	0	0	0	0	0	0	0	0	0	0	0	0	0	0	0
DD	Molluscs	2010		Mutela soleniformis	0	0	0	0	0	0	0	0	0	0	0	0	0	0	0	0	0	0	0	0
DD	Molluscs	2000	2010	Neritina oweniana	0	0	0	0	0	0	0	0	0	0	0	0	0	0	0	0	0	0	0	0
DD	Molluscs	2010		Neritina platyconcha	0	0	0	0	0	0	0	0	0	0	0	0	0	0	0	0	0	0	0	0
DD	Molluscs	2000	2010	Neritina rubricata	0	0	0	0	0	0	0	0	0	0	0	0	0	0	0	0	0	0	0	0
DD	Molluscs	2010		Nitia chefneuxi	0	0	0	0	0	0	0	0	0	0	0	0	0	0	0	0	0	0	0	0
DD	Molluscs	2010		Nyassunio ujijiensis	0	0	0	0	0	0	0	0	0	0	0	0	0	0	0	0	0	0	0	0
DD	Molluscs	2010		Ohridohauffenia sublitoralis	0	0	0	0	0	0	0	0	0	0	0	0	0	0	0	0	0	0	0	0
DD	Molluscs	2010		Paladilhia pontmartiniana	0	0	0	0	0	0	0	0	0	0	0	0	0	0	0	0	0	0	0	0
DD	Molluscs	2010		Paladilhiopsis bosniaca	0	0	0	0	0	0	0	0	0	0	0	0	0	0	0	0	0	0	0	0
DD	Molluscs	2010		Paladilhiopsis brandisi	0	0	0	0	0	0	0	0	0	0	0	0	0	0	0	0	0	0	0	0
DD	Molluscs	2010		Paladilhiopsis solida	0	0	0	0	0	0	0	0	0	0	0	0	0	0	0	0	0	0	0	0
DD	Molluscs	2010		Paladilhiopsis tarae	0	0	0	0	0	0	0	0	0	0	0	0	0	0	0	0	0	0	0	0
DD	Molluscs	2010		Paludomus andersoniana	0	0	0	0	0	0	0	0	0	0	0	0	0	0	0	0	0	0	0	0
DD	Molluscs	2010		Paludomus burmanica	0	0	0	0	0	0	0	0	0	0	0	0	0	0	0	0	0	0	0	0
DD	Molluscs	2010		Paludomus dhuma	0	0	0	0	0	0	0	0	0	0	0	0	0	0	0	0	0	0	0	0
DD	Molluscs	2010		Paludomus globulosa	0	0	0	0	0	0	0	0	0	0	0	0	0	0	0	0	0	0	0	0
DD	Molluscs	2010		Paludomus loricatus	0	0	0	0	0	0	0	0	0	0	0	0	0	0	0	0	0	0	0	0
DD	Molluscs	2010		Paludomus nana	0	0	0	0	0	0	0	0	0	0	0	0	0	0	0	0	0	0	0	0
DD	Molluscs	2010		Paludomus parvula	0	0	0	0	0	0	0	0	0	0	0	0	0	0	0	0	0	0	0	0
DD	Molluscs	2010		Paludomus pustulosa	0	0	0	0	0	0	0	0	0	0	0	0	0	0	0	0	0	0	0	0
DD	Molluscs	2010		Paramelania crassigranulata	0	0	0	0	0	0	0	0	0	0	0	0	0	0	0	0	0	0	0	0
DD	Molluscs	2010		Paramelania imperialis	0	0	0	0	0	0	0	0	0	0	0	0	0	0	0	0	0	0	0	0
DD	Molluscs	2010		Paramelania minor	0	0	0	0	0	0	0	0	0	0	0	0	0	0	0	0	0	0	0	0
DD	Molluscs	2010		Parreysia annandalei	0	0	0	0	0	0	0	0	0	0	0	0	0	0	0	0	0	0	0	0
DD	Molluscs	2010		Parreysia bhamoensis	0	0	0	0	0	0	0	0	0	0	0	0	0	0	0	0	0	0	0	0
DD	Molluscs	2010		Parreysia chaudhurii	0	0	0	0	0	0	0	0	0	0	0	0	0	0	0	0	0	0	0	0
DD	Molluscs	2010		Parreysia choprae	0	0	0	0	0	0	0	0	0	0	0	0	0	0	0	0	0	0	0	0
DD	Molluscs	2010		Parreysia corbis	0	0	0	0	0	0	0	0	0	0	0	0	0	0	0	0	0	0	0	0
DD	Molluscs	2010		Parreysia crispisulcata	0	0	0	0	0	0	0	0	0	0	0	0	0	0	0	0	0	0	0	0
DD	Molluscs	2010		Parreysia feae	0	0	0	0	0	0	0	0	0	0	0	0	0	0	0	0	0	0	0	0
DD	Molluscs	2010		Parreysia feddeni	0	0	0	0	0	0	0	0	0	0	0	0	0	0	0	0	0	0	0	0
DD	Molluscs	2010		Parreysia nuttalliana	0	0	0	0	0	0	0	0	0	0	0	0	0	0	0	0	0	0	0	0
DD	Molluscs	2010		Parreysia olivacea	0	0	0	0	0	0	0	0	0	0	0	0	0	0	0	0	0	0	0	0
DD	Molluscs	2010		Parreysia perconvexa	0	0	0	0	0	0	0	0	0	0	0	0	0	0	0	0	0	0	0	0
DD	Molluscs	2010		Peringia mabilli	0	0	0	0	0	0	0	0	0	0	0	0	0	0	0	0	0	0	0	0
DD	Molluscs	2010		Physunio micropteroides	0	0	0	0	0	0	0	0	0	0	0	0	0	0	0	0	0	0	0	0
DD	Molluscs	2010		Physunio velaris	0	0	0	0	0	0	0	0	0	0	0	0	0	0	0	0	0	0	0	0
DD	Molluscs	2010		Pila olea	0	0	0	0	0	0	0	0	0	0	0	0	0	0	0	0	0	0	0	0
DD	Molluscs	2010		Pila speciosa	0	0	0	0	0	0	0	0	0	0	0	0	0	0	0	0	0	0	0	0
DD	Molluscs	2010		Pisidium armillatum	0	0	0	0	0	0	0	0	0	0	0	0	0	0	0	0	0	0	0	0
DD	Molluscs	2010		Pisidium fistulosum	0	0	0	0	0	0	0	0	0	0	0	0	0	0	0	0	0	0	0	0
DD	Molluscs	2010		Pisidium giraudi	0	0	0	0	0	0	0	0	0	0	0	0	0	0	0	0	0	0	0	0
DD	Molluscs	2007		Pisidium harrisoni	0	0	0	0	0	0	0	0	0	0	0	0	0	0	0	0	0	0	0	0
DD	Molluscs	2010		Pisidium kenianum	0	0	0	0	0	0	0	0	0	0	0	0	0	0	0	0	0	0	0	0
DD	Molluscs	2010		Pisidium kuiperi	0	0	0	0	0	0	0	0	0	0	0	0	0	0	0	0	0	0	0	0
DD	Molluscs	2010		Plagigeyeria edlaueri	0	0	0	0	0	0	0	0	0	0	0	0	0	0	0	0	0	0	0	0
DD	Molluscs	2010		Plagigeyeria mostarensis	0	0	0	0	0	0	0	0	0	0	0	0	0	0	0	0	0	0	0	0
DD	Molluscs	2010		Plagigeyeria nitida	0	0	0	0	0	0	0	0	0	0	0	0	0	0	0	0	0	0	0	0
DD	Molluscs	2010		Plagigeyeria plagiostoma	0	0	0	0	0	0	0	0	0	0	0	0	0	0	0	0	0	0	0	0
DD	Molluscs	2009		Potadoma buttikoferi	0	0	0	0	0	0	0	0	0	0	0	0	0	0	0	0	0	0	0	0
DD	Molluscs	2009		Potadoma liberiensis	0	0	0	0	0	0	0	0	0	0	0	0	0	0	0	0	0	0	0	0
DD	Molluscs	2010		Potadoma riperti	0	0	0	0	0	0	0	0	0	0	0	0	0	0	0	0	0	0	0	0
DD	Molluscs	2010		Potadoma schoutedeni	0	0	0	0	0	0	0	0	0	0	0	0	0	0	0	0	0	0	0	0
DD	Molluscs	2009		Potadoma togoensis	0	0	0	0	0	0	0	0	0	0	0	0	0	0	0	0	0	0	0	0
DD	Molluscs	2010		Potadomoides bequaerti	1	0	0	0	0	0	0	0	0	0	0	0	1	0	0	0	0	0	0	0
DD	Molluscs	2010		Potadomoides broecki	0	0	0	0	0	0	0	0	0	0	0	0	0	0	0	0	0	0	0	0
DD	Molluscs	2010		Potadomoides hirta	1	0	0	0	0	0	0	0	0	0	0	0	1	0	0	0	0	0	0	0
DD	Molluscs	2010		Pseudamnicola confinis	0	0	0	0	0	0	0	0	0	0	0	0	0	0	0	0	0	0	0	0
DD	Molluscs	2010		Pseudamnicola constantinae	0	0	0	0	0	0	0	0	0	0	0	0	0	0	0	0	0	0	0	0
DD	Molluscs	2010		Pseudamnicola luteola	0	0	0	0	0	0	0	0	0	0	0	0	0	0	0	0	0	0	0	0
DD	Molluscs	2009		Pseudocleopatra voltana	0	0	0	0	0	0	0	0	0	0	0	0	0	0	0	0	0	0	0	0
DD	Molluscs	2010		Pseudodon avae	0	0	0	0	0	0	0	0	0	0	0	0	0	0	0	0	0	0	0	0
DD	Molluscs	2010		Pseudodon crebristriata	0	0	0	0	0	0	0	0	0	0	0	0	0	0	0	0	0	0	0	0
DD	Molluscs	2010		Pseudodon peguensis	0	0	0	0	0	0	0	0	0	0	0	0	0	0	0	0	0	0	0	0
DD	Molluscs	2010		Radix hookeri	0	0	0	0	0	0	0	0	0	0	0	0	0	0	0	0	0	0	0	0
DD	Molluscs	2010		Radomaniola bosniaca	0	0	0	0	0	0	0	0	0	0	0	0	0	0	0	0	0	0	0	0
DD	Molluscs	2004		Reymondia pyramidalis	0	0	0	0	0	0	0	0	0	0	0	0	0	0	0	0	0	0	0	0
DD	Molluscs	2009		Samoana annectens	0	0	0	0	0	0	0	0	0	0	0	0	0	0	0	0	0	0	0	0
DD	Molluscs	2010		Sarajana apfelbecki	0	0	0	0	0	0	0	0	0	0	0	0	0	0	0	0	0	0	0	0
DD	Molluscs	2009		Saulea vitrea	0	0	0	0	0	0	0	0	0	0	0	0	0	0	0	0	0	0	0	0
DD	Molluscs	2010		Saxurinator hadzii	0	0	0	0	0	0	0	0	0	0	0	0	0	0	0	0	0	0	0	0
DD	Molluscs	2010		Segmentina cantori	0	0	0	0	0	0	0	0	0	0	0	0	0	0	0	0	0	0	0	0
DD	Molluscs	2010		Segmentina taia	0	0	0	0	0	0	0	0	0	0	0	0	0	0	0	0	0	0	0	0
DD	Molluscs	2010		Segmentorbis eussoensis	0	0	0	0	0	0	0	0	0	0	0	0	0	0	0	0	0	0	0	0
DD	Molluscs	2007		Segmentorbis planodiscus	0	0	0	0	0	0	0	0	0	0	0	0	0	0	0	0	0	0	0	0
DD	Molluscs	2010		Sphaerium avanum	0	0	0	0	0	0	0	0	0	0	0	0	0	0	0	0	0	0	0	0
DD	Molluscs	2004	2010	Sphaerium bequaerti	0	0	0	0	0	0	0	0	0	0	0	0	0	0	0	0	0	0	0	0
DD	Molluscs	2010		Sphaerium maroccanum	0	0	0	0	0	0	0	0	0	0	0	0	0	0	0	0	0	0	0	0
DD	Molluscs	2010		Sphaerium regularis	0	0	0	0	0	0	0	0	0	0	0	0	0	0	0	0	0	0	0	0
DD	Molluscs	2004		Sphaerium stuhlmanni	0	0	0	0	0	0	0	0	0	0	0	0	0	0	0	0	0	0	0	0
DD	Molluscs	2010		Spiralix burgundina	0	0	0	0	0	0	0	0	0	0	0	0	0	0	0	0	0	0	0	0
DD	Molluscs	2010		Spiralix collieri	0	0	0	0	0	0	0	0	0	0	0	0	0	0	0	0	0	0	0	0
DD	Molluscs	2010		Stanleya neritinoides	1	0	0	0	0	0	0	0	1	0	0	0	0	0	0	0	0	0	0	0
DD	Molluscs	2010		Stenothyra echinata	0	0	0	0	0	0	0	0	0	0	0	0	0	0	0	0	0	0	0	0
DD	Molluscs	2010		Stenothyra foveolata	0	0	0	0	0	0	0	0	0	0	0	0	0	0	0	0	0	0	0	0
DD	Molluscs	2010		Stenothyra nana	0	0	0	0	0	0	0	0	0	0	0	0	0	0	0	0	0	0	0	0
DD	Molluscs	2010		Stenothyra woodmasoniana	0	0	0	0	0	0	0	0	0	0	0	0	0	0	0	0	0	0	0	0
DD	Molluscs	2010		Tomichia guillemei	0	0	0	0	0	0	0	0	0	0	0	0	0	0	0	0	0	0	0	0
DD	Molluscs	2010		Tomichia hendrickxi	0	0	0	0	0	0	0	0	0	0	0	0	0	0	0	0	0	0	0	0
DD	Molluscs	2010		Tomichia kivuensis	0	0	0	0	0	0	0	0	0	0	0	0	0	0	0	0	0	0	0	0
DD	Molluscs	2010		Tricula martini	0	0	0	0	0	0	0	0	0	0	0	0	0	0	0	0	0	0	0	0
DD	Molluscs	2010		Tricula taylori	0	0	0	0	0	0	0	0	0	0	0	0	0	0	0	0	0	0	0	0
DD	Molluscs	2010		Valvata nilotica	0	0	0	0	0	0	0	0	0	0	0	0	0	0	0	0	0	0	0	0
DD	Molluscs	2010		Valvata revoili	0	0	0	0	0	0	0	0	0	0	0	0	0	0	0	0	0	0	0	0
DD	Molluscs	2010		Vinundu guillemei	0	0	0	0	0	0	0	0	0	0	0	0	0	0	0	0	0	0	0	0
DD	Fish	2010		Aboma etheostoma	0	0	0	0	0	0	0	0	0	0	0	0	0	0	0	0	0	0	0	0
DD	Fish	2009		Acanthalburnus urmianus	1	0	0	0	0	0	0	0	0	0	0	0	0	1	0	0	0	0	0	0
DD	Fish	2010		Acanthistius brasilianus	6	0	0	0	0	0	0	1	0	0	0	0	0	3	0	1	1	0	0	0
DD	Fish	2004		Acentrogobius therezieni	0	0	0	0	0	0	0	0	0	0	0	0	0	0	0	0	0	0	0	0
DD	Fish	2009		Acheilognathus kyphus	0	0	0	0	0	0	0	0	0	0	0	0	0	0	0	0	0	0	0	0
DD	Fish	2010		Acreichthys hajam	0	0	0	0	0	0	0	0	0	0	0	0	0	0	0	0	0	0	0	0
DD	Fish	2009		Acrossocheilus kreyenbergii	2	0	0	0	0	0	0	0	0	0	0	1	0	0	0	1	0	0	0	0
DD	Fish	2004		Aculeola nigra	2	0	0	0	0	0	0	0	0	0	0	0	0	0	0	1	1	0	0	0
DD	Fish	2008		Aethaloperca rogaa	1	0	0	0	0	0	1	0	0	0	0	0	0	0	0	0	0	0	0	0
DD	Fish	2010		Ailia punctata	2	0	0	0	0	0	0	0	0	0	0	0	0	0	0	0	0	2	0	0
DD	Fish	2010		Akko brevis	1	0	0	0	0	0	0	0	0	1	0	0	0	0	0	0	0	0	0	0
DD	Fish	2009		Akrokolioplax bicornis	0	0	0	0	0	0	0	0	0	0	0	0	0	0	0	0	0	0	0	0
DD	Fish	2010		Allomycterus pilatus	0	0	0	0	0	0	0	0	0	0	0	0	0	0	0	0	0	0	0	0
DD	Fish	2000	2009	Alopias vulpinus	51	0	0	5	0	1	1	0	3	1	6	1	1	4	5	7	5	3	4	4
DD	Fish	2010		Alosa alabamae	9	0	0	0	0	1	0	0	0	0	0	0	0	3	0	1	0	2	1	1
DD	Fish	2008		Alosa algeriensis	0	0	0	0	0	0	0	0	0	0	0	0	0	0	0	0	0	0	0	0
DD	Fish	2010		Amarginops platus	0	0	0	0	0	0	0	0	0	0	0	0	0	0	0	0	0	0	0	0
DD	Fish	2004		Ambassis fontoynonti	0	0	0	0	0	0	0	0	0	0	0	0	0	0	0	0	0	0	0	0
DD	Fish	2010		Amblyceps caecutiens	0	0	0	0	0	0	0	0	0	0	0	0	0	0	0	0	0	0	0	0
DD	Fish	2010		Amblyceps murraystuarti	0	0	0	0	0	0	0	0	0	0	0	0	0	0	0	0	0	0	0	0
DD	Fish	2010		Amblyceps tenuispinis	0	0	0	0	0	0	0	0	0	0	0	0	0	0	0	0	0	0	0	0
DD	Fish	2010		Amblyeleotris callopareia	0	0	0	0	0	0	0	0	0	0	0	0	0	0	0	0	0	0	0	0
DD	Fish	2004		Amblyraja frerichsi	2	0	0	0	0	0	0	0	0	0	0	0	0	0	1	0	0	1	0	0
DD	Fish	2009		Amblyraja georgiana	5	0	0	0	0	0	0	0	0	0	1	1	0	0	1	0	1	1	0	0
DD	Fish	2009		Amblyraja reversa	0	0	0	0	0	0	0	0	0	0	0	0	0	0	0	0	0	0	0	0
DD	Fish	2009		Amblyraja taaf	1	0	0	0	0	0	0	0	0	0	0	0	1	0	0	0	0	0	0	0
DD	Fish	2010		Amphichaetodon melbae	0	0	0	0	0	0	0	0	0	0	0	0	0	0	0	0	0	0	0	0
DD	Fish	2010		Amphilius lampei	0	0	0	0	0	0	0	0	0	0	0	0	0	0	0	0	0	0	0	0
DD	Fish	2010		Amphilius lentiginosus	0	0	0	0	0	0	0	0	0	0	0	0	0	0	0	0	0	0	0	0
DD	Fish	2010		Amphilius maesii	0	0	0	0	0	0	0	0	0	0	0	0	0	0	0	0	0	0	0	0
DD	Fish	2009		Amphilius opisthophthalmus	0	0	0	0	0	0	0	0	0	0	0	0	0	0	0	0	0	0	0	0
DD	Fish	2009		Anabarilius xundianensis	0	0	0	0	0	0	0	0	0	0	0	0	0	0	0	0	0	0	0	0
DD	Fish	2010		Anabas cobojius	3	0	0	0	0	0	0	0	2	0	0	0	1	0	0	0	0	0	0	0
DD	Fish	2010		Anabas testudineus	117	0	0	3	5	10	7	3	1	3	1	5	11	6	13	5	6	13	13	12
DD	Fish	2009		Anacanthobatis americanus	0	0	0	0	0	0	0	0	0	0	0	0	0	0	0	0	0	0	0	0
DD	Fish	2009		Anacanthobatis donghaiensis	0	0	0	0	0	0	0	0	0	0	0	0	0	0	0	0	0	0	0	0
DD	Fish	2009		Anacanthobatis folirostris	0	0	0	0	0	0	0	0	0	0	0	0	0	0	0	0	0	0	0	0
DD	Fish	2009		Anacanthobatis longirostris	0	0	0	0	0	0	0	0	0	0	0	0	0	0	0	0	0	0	0	0
DD	Fish	2004		Anacanthobatis marmoratus	0	0	0	0	0	0	0	0	0	0	0	0	0	0	0	0	0	0	0	0
DD	Fish	2009		Anacanthobatis nanhaiensis	1	0	0	0	0	0	0	0	0	0	0	0	0	0	0	0	0	0	1	0
DD	Fish	2004		Anacanthobatis ori	1	0	0	0	0	0	0	0	0	0	0	0	0	0	0	0	0	0	0	1
DD	Fish	2009		Anacanthobatis stenosoma	0	0	0	0	0	0	0	0	0	0	0	0	0	0	0	0	0	0	0	0
DD	Fish	2010		Anampses lineatus	0	0	0	0	0	0	0	0	0	0	0	0	0	0	0	0	0	0	0	0
DD	Fish	2010		Anampses viridis	1	0	0	0	0	0	0	0	0	0	0	0	0	0	0	0	0	0	1	0
DD	Fish	2010		Anchoa analis	0	0	0	0	0	0	0	0	0	0	0	0	0	0	0	0	0	0	0	0
DD	Fish	2010		Anchoviella balboae	0	0	0	0	0	0	0	0	0	0	0	0	0	0	0	0	0	0	0	0
DD	Fish	2010		Ancylopsetta kumperae	0	0	0	0	0	0	0	0	0	0	0	0	0	0	0	0	0	0	0	0
DD	Fish	2010		Anodontostoma selangkat	0	0	0	0	0	0	0	0	0	0	0	0	0	0	0	0	0	0	0	0
DD	Fish	2010		Antimora microlepis	6	0	1	0	1	0	1	0	0	0	0	0	0	0	0	0	2	1	0	0
DD	Fish	2006	2014	Aphanius anatoliae	10	0	0	0	0	0	0	1	0	0	0	1	1	2	1	0	0	1	1	2
DD	Fish	2006		Aphanius apodus	2	0	0	0	0	0	1	0	0	0	0	0	0	0	0	0	0	1	0	0
DD	Fish	2010		Aphanius desioi	0	0	0	0	0	0	0	0	0	0	0	0	0	0	0	0	0	0	0	0
DD	Fish	2006	2014	Aphanius sureyanus	0	0	0	0	0	0	0	0	0	0	0	0	0	0	0	0	0	0	0	0
DD	Fish	2010		Aphyosemion caudofasciatum	0	0	0	0	0	0	0	0	0	0	0	0	0	0	0	0	0	0	0	0
DD	Fish	2010		Aphyosemion chauchei	0	0	0	0	0	0	0	0	0	0	0	0	0	0	0	0	0	0	0	0
DD	Fish	2010		Aphyosemion congicum	0	0	0	0	0	0	0	0	0	0	0	0	0	0	0	0	0	0	0	0
DD	Fish	2010		Aphyosemion decorsei	0	0	0	0	0	0	0	0	0	0	0	0	0	0	0	0	0	0	0	0
DD	Fish	2010		Aphyosemion heinemanni	0	0	0	0	0	0	0	0	0	0	0	0	0	0	0	0	0	0	0	0
DD	Fish	2010		Aphyosemion lefiniense	0	0	0	0	0	0	0	0	0	0	0	0	0	0	0	0	0	0	0	0
DD	Fish	2010		Aphyosemion schoutedeni	0	0	0	0	0	0	0	0	0	0	0	0	0	0	0	0	0	0	0	0
DD	Fish	2010		Aphyosemion seegersi	0	0	0	0	0	0	0	0	0	0	0	0	0	0	0	0	0	0	0	0
DD	Fish	2010		Aphyosemion trilineatus	0	0	0	0	0	0	0	0	0	0	0	0	0	0	0	0	0	0	0	0
DD	Fish	2010		Aphyosemion wuendschi	0	0	0	0	0	0	0	0	0	0	0	0	0	0	0	0	0	0	0	0
DD	Fish	2010		Aphyosemion zygaima	0	0	0	0	0	0	0	0	0	0	0	0	0	0	0	0	0	0	0	0
DD	Fish	2010		Aplocheilichthys nigrolateralis	0	0	0	0	0	0	0	0	0	0	0	0	0	0	0	0	0	0	0	0
DD	Fish	2010		Apodocreedia vanderhorsti	0	0	0	0	0	0	0	0	0	0	0	0	0	0	0	0	0	0	0	0
DD	Fish	2010		Apogon semilineatus	1	0	0	0	0	0	0	0	0	0	0	0	1	0	0	0	0	0	0	0
DD	Fish	2010		Apolemichthys guezei	0	0	0	0	0	0	0	0	0	0	0	0	0	0	0	0	0	0	0	0
DD	Fish	2004		Apristurus brunneus	2	0	0	0	0	0	0	0	0	0	0	1	0	1	0	0	0	0	0	0
DD	Fish	2004		Apristurus canutus	1	0	0	0	0	0	0	0	0	0	0	0	0	0	0	0	0	0	0	1
DD	Fish	2004		Apristurus fedorovi	1	0	0	0	0	1	0	0	0	0	0	0	0	0	0	0	0	0	0	0
DD	Fish	2004		Apristurus gibbosus	0	0	0	0	0	0	0	0	0	0	0	0	0	0	0	0	0	0	0	0
DD	Fish	2004		Apristurus herklotsi	1	0	0	0	0	0	0	0	0	0	0	0	0	0	0	0	0	0	1	0
DD	Fish	2009		Apristurus indicus	1	0	0	0	0	0	0	0	0	0	0	0	0	1	0	0	0	0	0	0
DD	Fish	2004		Apristurus internatus	0	0	0	0	0	0	0	0	0	0	0	0	0	0	0	0	0	0	0	0
DD	Fish	2004		Apristurus investigatoris	0	0	0	0	0	0	0	0	0	0	0	0	0	0	0	0	0	0	0	0
DD	Fish	2009		Apristurus japonicus	1	0	0	0	1	0	0	0	0	0	0	0	0	0	0	0	0	0	0	0
DD	Fish	2004		Apristurus kampae	2	0	0	0	0	0	0	0	0	0	0	0	0	1	0	1	0	0	0	0
DD	Fish	2004		Apristurus laurussonii	3	0	0	1	0	0	0	0	0	2	0	0	0	0	0	0	0	0	0	0
DD	Fish	2004	2015	Apristurus longicephalus	1	0	0	0	0	0	0	0	0	0	1	0	0	0	0	0	0	0	0	0
DD	Fish	2004		Apristurus macrorhynchus	0	0	0	0	0	0	0	0	0	0	0	0	0	0	0	0	0	0	0	0
DD	Fish	2004		Apristurus macrostomus	1	0	0	0	0	0	0	0	0	0	0	0	0	0	0	1	0	0	0	0
DD	Fish	2004		Apristurus micropterygeus	0	0	0	0	0	0	0	0	0	0	0	0	0	0	0	0	0	0	0	0
DD	Fish	2004		Apristurus nasutus	2	0	0	0	0	0	0	0	0	0	0	0	0	0	1	0	0	1	0	0
DD	Fish	2004		Apristurus parvipinnis	0	0	0	0	0	0	0	0	0	0	0	0	0	0	0	0	0	0	0	0
DD	Fish	2004	2015	Apristurus pinguis	0	0	0	0	0	0	0	0	0	0	0	0	0	0	0	0	0	0	0	0
DD	Fish	2004	2015	Apristurus platyrhynchus	1	0	0	0	0	1	0	0	0	0	0	0	0	0	0	0	0	0	0	0
DD	Fish	2004		Apristurus profundorum	1	0	0	0	0	0	0	0	0	0	0	0	0	0	0	0	0	0	1	0
DD	Fish	2004		Apristurus riveri	0	0	0	0	0	0	0	0	0	0	0	0	0	0	0	0	0	0	0	0
DD	Fish	2009		Apristurus sibogae	0	0	0	0	0	0	0	0	0	0	0	0	0	0	0	0	0	0	0	0
DD	Fish	2004		Apristurus sinensis	0	0	0	0	0	0	0	0	0	0	0	0	0	0	0	0	0	0	0	0
DD	Fish	2004		Apristurus spongiceps	0	0	0	0	0	0	0	0	0	0	0	0	0	0	0	0	0	0	0	0
DD	Fish	2004		Apristurus stenseni	0	0	0	0	0	0	0	0	0	0	0	0	0	0	0	0	0	0	0	0
DD	Fish	2009		Apteronotus apurensis	0	0	0	0	0	0	0	0	0	0	0	0	0	0	0	0	0	0	0	0
DD	Fish	2010		Araiophos eastropas	0	0	0	0	0	0	0	0	0	0	0	0	0	0	0	0	0	0	0	0
DD	Fish	2009		Arhynchobatis asperrimus	0	0	0	0	0	0	0	0	0	0	0	0	0	0	0	0	0	0	0	0
DD	Fish	2010		Arnoglossus brunneus	0	0	0	0	0	0	0	0	0	0	0	0	0	0	0	0	0	0	0	0
DD	Fish	2010		Asarcenchelys longimanus	0	0	0	0	0	0	0	0	0	0	0	0	0	0	0	0	0	0	0	0
DD	Fish	2010		Aseraggodes herrei	0	0	0	0	0	0	0	0	0	0	0	0	0	0	0	0	0	0	0	0
DD	Fish	2010		Astrabe fasciata	0	0	0	0	0	0	0	0	0	0	0	0	0	0	0	0	0	0	0	0
DD	Fish	2003	2015	Asymbolus analis	4	0	0	0	0	0	0	0	2	0	0	0	0	0	0	0	1	0	1	0
DD	Fish	2010		Atherinella nesiotes	0	0	0	0	0	0	0	0	0	0	0	0	0	0	0	0	0	0	0	0
DD	Fish	2010		Atopochilus chabanaudi	0	0	0	0	0	0	0	0	0	0	0	0	0	0	0	0	0	0	0	0
DD	Fish	2010		Atopochilus macrocephalus	0	0	0	0	0	0	0	0	0	0	0	0	0	0	0	0	0	0	0	0
DD	Fish	2010		Atopochilus mandevillei	0	0	0	0	0	0	0	0	0	0	0	0	0	0	0	0	0	0	0	0
DD	Fish	2010		Atopochilus pachychilus	0	0	0	0	0	0	0	0	0	0	0	0	0	0	0	0	0	0	0	0
DD	Fish	2006		Atopochilus vogti	0	0	0	0	0	0	0	0	0	0	0	0	0	0	0	0	0	0	0	0
DD	Fish	2010		Atrobucca kyushini	0	0	0	0	0	0	0	0	0	0	0	0	0	0	0	0	0	0	0	0
DD	Fish	2006		Aulonocara brevirostris	0	0	0	0	0	0	0	0	0	0	0	0	0	0	0	0	0	0	0	0
DD	Fish	2006		Aulonocara trematocephala	0	0	0	0	0	0	0	0	0	0	0	0	0	0	0	0	0	0	0	0
DD	Fish	2010		Austroglossus microlepis	2	0	0	0	0	0	0	1	0	0	1	0	0	0	0	0	0	0	0	0
DD	Fish	2010		Badis assamensis	0	0	0	0	0	0	0	0	0	0	0	0	0	0	0	0	0	0	0	0
DD	Fish	2010		Bagrus filamentosus	0	0	0	0	0	0	0	0	0	0	0	0	0	0	0	0	0	0	0	0
DD	Fish	2010		Bagrus lubosicus	0	0	0	0	0	0	0	0	0	0	0	0	0	0	0	0	0	0	0	0
DD	Fish	2006		Bagrus urostigma	0	0	0	0	0	0	0	0	0	0	0	0	0	0	0	0	0	0	0	0
DD	Fish	2010		Bahaba chaptis	0	0	0	0	0	0	0	0	0	0	0	0	0	0	0	0	0	0	0	0
DD	Fish	2006		Barbatula namiri	0	0	0	0	0	0	0	0	0	0	0	0	0	0	0	0	0	0	0	0
DD	Fish	2010		Barbopsis devecchii	1	1	0	0	0	0	0	0	0	0	0	0	0	0	0	0	0	0	0	0
DD	Fish	2010		Barbulifer mexicanus	0	0	0	0	0	0	0	0	0	0	0	0	0	0	0	0	0	0	0	0
DD	Fish	2010		Barbulifer pantherinus	0	0	0	0	0	0	0	0	0	0	0	0	0	0	0	0	0	0	0	0
DD	Fish	2010		Barbus aboinensis	0	0	0	0	0	0	0	0	0	0	0	0	0	0	0	0	0	0	0	0
DD	Fish	2010		Barbus aloyi	0	0	0	0	0	0	0	0	0	0	0	0	0	0	0	0	0	0	0	0
DD	Fish	2006		Barbus antinorii	0	0	0	0	0	0	0	0	0	0	0	0	0	0	0	0	0	0	0	0
DD	Fish	2007		Barbus bellcrossi	0	0	0	0	0	0	0	0	0	0	0	0	0	0	0	0	0	0	0	0
DD	Fish	2010		Barbus brachygramma	0	0	0	0	0	0	0	0	0	0	0	0	0	0	0	0	0	0	0	0
DD	Fish	2007		Barbus brevilateralis	0	0	0	0	0	0	0	0	0	0	0	0	0	0	0	0	0	0	0	0
DD	Fish	2010		Barbus castrasibutum	0	0	0	0	0	0	0	0	0	0	0	0	0	0	0	0	0	0	0	0
DD	Fish	2010		Barbus catenarius	0	0	0	0	0	0	0	0	0	0	0	0	0	0	0	0	0	0	0	0
DD	Fish	2009		Barbus caudosignatus	0	0	0	0	0	0	0	0	0	0	0	0	0	0	0	0	0	0	0	0
DD	Fish	2010		Barbus citrinus	0	0	0	0	0	0	0	0	0	0	0	0	0	0	0	0	0	0	0	0
DD	Fish	2010		Barbus clauseni	0	0	0	0	0	0	0	0	0	0	0	0	0	0	0	0	0	0	0	0
DD	Fish	2010		Barbus condei	1	0	0	1	0	0	0	0	0	0	0	0	0	0	0	0	0	0	0	0
DD	Fish	2010		Barbus dartevellei	0	0	0	0	0	0	0	0	0	0	0	0	0	0	0	0	0	0	0	0
DD	Fish	2010		Barbus deguidei	0	0	0	0	0	0	0	0	0	0	0	0	0	0	0	0	0	0	0	0
DD	Fish	2010		Barbus erythrozonus	0	0	0	0	0	0	0	0	0	0	0	0	0	0	0	0	0	0	0	0
DD	Fish	2010		Barbus eutaenia	0	0	0	0	0	0	0	0	0	0	0	0	0	0	0	0	0	0	0	0
DD	Fish	2010		Barbus gestetneri	0	0	0	0	0	0	0	0	0	0	0	0	0	0	0	0	0	0	0	0
DD	Fish	2007		Barbus girardi	0	0	0	0	0	0	0	0	0	0	0	0	0	0	0	0	0	0	0	0
DD	Fish	2007		Barbus greenwoodi	0	0	0	0	0	0	0	0	0	0	0	0	0	0	0	0	0	0	0	0
DD	Fish	2010		Barbus guildi	0	0	0	0	0	0	0	0	0	0	0	0	0	0	0	0	0	0	0	0
DD	Fish	2010		Barbus guineensis	0	0	0	0	0	0	0	0	0	0	0	0	0	0	0	0	0	0	0	0
DD	Fish	2007		Barbus gulielmi	0	0	0	0	0	0	0	0	0	0	0	0	0	0	0	0	0	0	0	0
DD	Fish	2007		Barbus hondeensis	0	0	0	0	0	0	0	0	0	0	0	0	0	0	0	0	0	0	0	0
DD	Fish	2010		Barbus inaequalis	0	0	0	0	0	0	0	0	0	0	0	0	0	0	0	0	0	0	0	0
DD	Fish	2010		Barbus iturii	0	0	0	0	0	0	0	0	0	0	0	0	0	0	0	0	0	0	0	0
DD	Fish	2010		Barbus jubbi	0	0	0	0	0	0	0	0	0	0	0	0	0	0	0	0	0	0	0	0
DD	Fish	2010		Barbus kuiluensis	0	0	0	0	0	0	0	0	0	0	0	0	0	0	0	0	0	0	0	0
DD	Fish	2010		Barbus lagoensis	0	0	0	0	0	0	0	0	0	0	0	0	0	0	0	0	0	0	0	0
DD	Fish	2010		Barbus lamani	0	0	0	0	0	0	0	0	0	0	0	0	0	0	0	0	0	0	0	0
DD	Fish	2010		Barbus leptopogon	0	0	0	0	0	0	0	0	0	0	0	0	0	0	0	0	0	0	0	0
DD	Fish	2010		Barbus longifilis	0	0	0	0	0	0	0	0	0	0	0	0	0	0	0	0	0	0	0	0
DD	Fish	2006		Barbus lornae	0	0	0	0	0	0	0	0	0	0	0	0	0	0	0	0	0	0	0	0
DD	Fish	2006		Barbus lorteti	0	0	0	0	0	0	0	0	0	0	0	0	0	0	0	0	0	0	0	0
DD	Fish	2006		Barbus loveridgii	0	0	0	0	0	0	0	0	0	0	0	0	0	0	0	0	0	0	0	0
DD	Fish	2010		Barbus lujae	0	0	0	0	0	0	0	0	0	0	0	0	0	0	0	0	0	0	0	0
DD	Fish	2010		Barbus lukindae	0	0	0	0	0	0	0	0	0	0	0	0	0	0	0	0	0	0	0	0
DD	Fish	2006		Barbus macedonicus	3	0	0	0	0	0	0	0	0	0	0	0	0	0	0	1	1	1	0	0
DD	Fish	2010		Barbus machadoi	0	0	0	0	0	0	0	0	0	0	0	0	0	0	0	0	0	0	0	0
DD	Fish	2010		Barbus macroceps	0	0	0	0	0	0	0	0	0	0	0	0	0	0	0	0	0	0	0	0
DD	Fish	2006		Barbus mariae	0	0	0	0	0	0	0	0	0	0	0	0	0	0	0	0	0	0	0	0
DD	Fish	2010		Barbus mawambi	0	0	0	0	0	0	0	0	0	0	0	0	0	0	0	0	0	0	0	0
DD	Fish	2010		Barbus mediosquamatus	0	0	0	0	0	0	0	0	0	0	0	0	0	0	0	0	0	0	0	0
DD	Fish	2010		Barbus microterolepis	0	0	0	0	0	0	0	0	0	0	0	0	0	0	0	0	0	0	0	0
DD	Fish	2009		Barbus mirabilis	0	0	0	0	0	0	0	0	0	0	0	0	0	0	0	0	0	0	0	0
DD	Fish	2007		Barbus mocoensis	0	0	0	0	0	0	0	0	0	0	0	0	0	0	0	0	0	0	0	0
DD	Fish	2010		Barbus myersi	0	0	0	0	0	0	0	0	0	0	0	0	0	0	0	0	0	0	0	0
DD	Fish	2010		Barbus nanningsi	0	0	0	0	0	0	0	0	0	0	0	0	0	0	0	0	0	0	0	0
DD	Fish	2010		Barbus nigrifilis	0	0	0	0	0	0	0	0	0	0	0	0	0	0	0	0	0	0	0	0
DD	Fish	2010		Barbus okae	0	0	0	0	0	0	0	0	0	0	0	0	0	0	0	0	0	0	0	0
DD	Fish	2009		Barbus owenae	0	0	0	0	0	0	0	0	0	0	0	0	0	0	0	0	0	0	0	0
DD	Fish	2006		Barbus pagenstecheri	0	0	0	0	0	0	0	0	0	0	0	0	0	0	0	0	0	0	0	0
DD	Fish	2010		Barbus papilio	0	0	0	0	0	0	0	0	0	0	0	0	0	0	0	0	0	0	0	0
DD	Fish	2010		Barbus paucisquamatus	0	0	0	0	0	0	0	0	0	0	0	0	0	0	0	0	0	0	0	0
DD	Fish	2010		Barbus petchkovskyi	0	0	0	0	0	0	0	0	0	0	0	0	0	0	0	0	0	0	0	0
DD	Fish	2010		Barbus pleurogramma	3	0	0	0	0	0	0	1	0	0	0	1	1	0	0	0	0	0	0	0
DD	Fish	2009		Barbus profundus	0	0	0	0	0	0	0	0	0	0	0	0	0	0	0	0	0	0	0	0
DD	Fish	2010		Barbus pumilus	0	0	0	0	0	0	0	0	0	0	0	0	0	0	0	0	0	0	0	0
DD	Fish	2010		Barbus pygmaeus	0	0	0	0	0	0	0	0	0	0	0	0	0	0	0	0	0	0	0	0
DD	Fish	2006		Barbus quadripunctatus	0	0	0	0	0	0	0	0	0	0	0	0	0	0	0	0	0	0	0	0
DD	Fish	2007		Barbus rhinophorus	0	0	0	0	0	0	0	0	0	0	0	0	0	0	0	0	0	0	0	0
DD	Fish	2007		Barbus rosae	0	0	0	0	0	0	0	0	0	0	0	0	0	0	0	0	0	0	0	0
DD	Fish	2007		Barbus roussellei	0	0	0	0	0	0	0	0	0	0	0	0	0	0	0	0	0	0	0	0
DD	Fish	2010		Barbus rouxi	0	0	0	0	0	0	0	0	0	0	0	0	0	0	0	0	0	0	0	0
DD	Fish	2006		Barbus sexradiatus	0	0	0	0	0	0	0	0	0	0	0	0	0	0	0	0	0	0	0	0
DD	Fish	2010		Barbus syntrechalepis	0	0	0	0	0	0	0	0	0	0	0	0	0	0	0	0	0	0	0	0
DD	Fish	2010		Barbus tegulifer	0	0	0	0	0	0	0	0	0	0	0	0	0	0	0	0	0	0	0	0
DD	Fish	2010		Barbus tetraspilus	1	0	0	0	0	0	0	0	0	0	0	0	0	1	0	0	0	0	0	0
DD	Fish	2010		Barbus tetrastigma	0	0	0	0	0	0	0	0	0	0	0	0	0	0	0	0	0	0	0	0
DD	Fish	2010		Barbus tiekoroi	0	0	0	0	0	0	0	0	0	0	0	0	0	0	0	0	0	0	0	0
DD	Fish	2010		Barbus tomiensis	0	0	0	0	0	0	0	0	0	0	0	0	0	0	0	0	0	0	0	0
DD	Fish	2010		Barbus tongaensis	0	0	0	0	0	0	0	0	0	0	0	0	0	0	0	0	0	0	0	0
DD	Fish	2010		Barbus trispiloides	0	0	0	0	0	0	0	0	0	0	0	0	0	0	0	0	0	0	0	0
DD	Fish	2010		Barbus urotaenia	0	0	0	0	0	0	0	0	0	0	0	0	0	0	0	0	0	0	0	0
DD	Fish	2006		Barbus venustus	0	0	0	0	0	0	0	0	0	0	0	0	0	0	0	0	0	0	0	0
DD	Fish	2006		Barbus viktorianus	0	0	0	0	0	0	0	0	0	0	0	0	0	0	0	0	0	0	0	0
DD	Fish	2007		Barbus wellmani	0	0	0	0	0	0	0	0	0	0	0	0	0	0	0	0	0	0	0	0
DD	Fish	2010		Barbus yeiensis	0	0	0	0	0	0	0	0	0	0	0	0	0	0	0	0	0	0	0	0
DD	Fish	2010		Barilius bonarensis	0	0	0	0	0	0	0	0	0	0	0	0	0	0	0	0	0	0	0	0
DD	Fish	2010		Barilius radiolatus	0	0	0	0	0	0	0	0	0	0	0	0	0	0	0	0	0	0	0	0
DD	Fish	2010		Batasio merianiensis	0	0	0	0	0	0	0	0	0	0	0	0	0	0	0	0	0	0	0	0
DD	Fish	2006		Bathyclarias ilesi	0	0	0	0	0	0	0	0	0	0	0	0	0	0	0	0	0	0	0	0
DD	Fish	2006		Bathyclarias jacksoni	0	0	0	0	0	0	0	0	0	0	0	0	0	0	0	0	0	0	0	0
DD	Fish	2010		Bathycongrus retrotinctus	0	0	0	0	0	0	0	0	0	0	0	0	0	0	0	0	0	0	0	0
DD	Fish	2009		Bathygobius ostreicola	0	0	0	0	0	0	0	0	0	0	0	0	0	0	0	0	0	0	0	0
DD	Fish	2010		Bathylaco macrophthalmus	0	0	0	0	0	0	0	0	0	0	0	0	0	0	0	0	0	0	0	0
DD	Fish	2010		Bathylychnops brachyrhynchus	0	0	0	0	0	0	0	0	0	0	0	0	0	0	0	0	0	0	0	0
DD	Fish	2010		Bathymaster derjugini	2	1	0	0	1	0	0	0	0	0	0	0	0	0	0	0	0	0	0	0
DD	Fish	2010		Bathypterois oddi	0	0	0	0	0	0	0	0	0	0	0	0	0	0	0	0	0	0	0	0
DD	Fish	2006		Bathyraja aguja	0	0	0	0	0	0	0	0	0	0	0	0	0	0	0	0	0	0	0	0
DD	Fish	2009		Bathyraja eatonii	6	0	0	0	0	0	0	1	0	0	1	0	1	1	0	0	0	1	0	1
DD	Fish	2009		Bathyraja hesperafricana	0	0	0	0	0	0	0	0	0	0	0	0	0	0	0	0	0	0	0	0
DD	Fish	2009		Bathyraja kincaidii	5	0	0	0	0	0	0	0	0	0	0	0	2	0	0	0	1	0	0	2
DD	Fish	2004		Bathyraja longicauda	0	0	0	0	0	0	0	0	0	0	0	0	0	0	0	0	0	0	0	0
DD	Fish	2009		Bathyraja matsubarai	0	0	0	0	0	0	0	0	0	0	0	0	0	0	0	0	0	0	0	0
DD	Fish	2009		Bathyraja meridionalis	1	0	0	0	0	0	0	0	0	0	0	0	0	0	1	0	0	0	0	0
DD	Fish	2007		Bathyraja papilonifera	0	0	0	0	0	0	0	0	0	0	0	0	0	0	0	0	0	0	0	0
DD	Fish	2007		Bathyraja peruana	0	0	0	0	0	0	0	0	0	0	0	0	0	0	0	0	0	0	0	0
DD	Fish	2007		Bathyraja schroederi	1	0	0	0	0	0	0	0	0	0	0	0	0	0	0	0	0	0	0	1
DD	Fish	2009		Bathyraja shuntovi	0	0	0	0	0	0	0	0	0	0	0	0	0	0	0	0	0	0	0	0
DD	Fish	2009		Bathyraja smithii	0	0	0	0	0	0	0	0	0	0	0	0	0	0	0	0	0	0	0	0
DD	Fish	2009		Bathyraja violacea	1	0	0	0	0	0	0	0	0	1	0	0	0	0	0	0	0	0	0	0
DD	Fish	2010		Batrachoides walkeri	0	0	0	0	0	0	0	0	0	0	0	0	0	0	0	0	0	0	0	0
DD	Fish	2010		Belonoglanis brieni	0	0	0	0	0	0	0	0	0	0	0	0	0	0	0	0	0	0	0	0
DD	Fish	2009		Benthobatis moresbyi	0	0	0	0	0	0	0	0	0	0	0	0	0	0	0	0	0	0	0	0
DD	Fish	2010		Bodianus izuensis	0	0	0	0	0	0	0	0	0	0	0	0	0	0	0	0	0	0	0	0
DD	Fish	2010		Bodianus oxycephalus	0	0	0	0	0	0	0	0	0	0	0	0	0	0	0	0	0	0	0	0
DD	Fish	2010		Bodianus speciosus	0	0	0	0	0	0	0	0	0	0	0	0	0	0	0	0	0	0	0	0
DD	Fish	2010		Bodianus tanyokidus	0	0	0	0	0	0	0	0	0	0	0	0	0	0	0	0	0	0	0	0
DD	Fish	2010		Bodianus thoracotaeniatus	0	0	0	0	0	0	0	0	0	0	0	0	0	0	0	0	0	0	0	0
DD	Fish	2010		Bollmannia gomezi	0	0	0	0	0	0	0	0	0	0	0	0	0	0	0	0	0	0	0	0
DD	Fish	2010		Bollmannia longpinnus	0	0	0	0	0	0	0	0	0	0	0	0	0	0	0	0	0	0	0	0
DD	Fish	2010		Bollmannia macropoma	0	0	0	0	0	0	0	0	0	0	0	0	0	0	0	0	0	0	0	0
DD	Fish	2010		Bollmannia marginalis	0	0	0	0	0	0	0	0	0	0	0	0	0	0	0	0	0	0	0	0
DD	Fish	2010		Bollmannia ocellata	0	0	0	0	0	0	0	0	0	0	0	0	0	0	0	0	0	0	0	0
DD	Fish	2010		Bollmannia pawneea	0	0	0	0	0	0	0	0	0	0	0	0	0	0	0	0	0	0	0	0
DD	Fish	2010		Bollmannia stigmatura	0	0	0	0	0	0	0	0	0	0	0	0	0	0	0	0	0	0	0	0
DD	Fish	2010		Bollmannia umbrosa	0	0	0	0	0	0	0	0	0	0	0	0	0	0	0	0	0	0	0	0
DD	Fish	2010		Brachirus sorsogonensis	0	0	0	0	0	0	0	0	0	0	0	0	0	0	0	0	0	0	0	0
DD	Fish	2010		Brachypetersius notospilus	0	0	0	0	0	0	0	0	0	0	0	0	0	0	0	0	0	0	0	0
DD	Fish	2009		Breviraja claramaculata	0	0	0	0	0	0	0	0	0	0	0	0	0	0	0	0	0	0	0	0
DD	Fish	2009		Breviraja colesi	0	0	0	0	0	0	0	0	0	0	0	0	0	0	0	0	0	0	0	0
DD	Fish	2009		Breviraja nigriventralis	0	0	0	0	0	0	0	0	0	0	0	0	0	0	0	0	0	0	0	0
DD	Fish	2009		Breviraja spinosa	0	0	0	0	0	0	0	0	0	0	0	0	0	0	0	0	0	0	0	0
DD	Fish	2009		Brochiraja asperula	1	0	0	0	0	0	0	0	0	0	0	1	0	0	0	0	0	0	0	0
DD	Fish	2009		Brochiraja spinifera	0	0	0	0	0	0	0	0	0	0	0	0	0	0	0	0	0	0	0	0
DD	Fish	2010		Brotula clarkae	2	0	0	0	0	0	0	0	0	0	0	0	1	1	0	0	0	0	0	0
DD	Fish	2010		Brycinus abeli	0	0	0	0	0	0	0	0	0	0	0	0	0	0	0	0	0	0	0	0
DD	Fish	2010		Brycinus carmesinus	0	0	0	0	0	0	0	0	0	0	0	0	0	0	0	0	0	0	0	0
DD	Fish	2010		Brycinus comptus	0	0	0	0	0	0	0	0	0	0	0	0	0	0	0	0	0	0	0	0
DD	Fish	2007		Brycinus humilis	0	0	0	0	0	0	0	0	0	0	0	0	0	0	0	0	0	0	0	0
DD	Fish	2009		Brycon posadae	0	0	0	0	0	0	0	0	0	0	0	0	0	0	0	0	0	0	0	0
DD	Fish	2010		Bryx veleronis	0	0	0	0	0	0	0	0	0	0	0	0	0	0	0	0	0	0	0	0
DD	Fish	2006		Buccochromis atritaeniatus	0	0	0	0	0	0	0	0	0	0	0	0	0	0	0	0	0	0	0	0
DD	Fish	2006		Buccochromis oculatus	0	0	0	0	0	0	0	0	0	0	0	0	0	0	0	0	0	0	0	0
DD	Fish	2004		Bythaelurus alcockii	0	0	0	0	0	0	0	0	0	0	0	0	0	0	0	0	0	0	0	0
DD	Fish	2006		Bythaelurus canescens	3	0	0	0	0	0	0	0	0	0	0	0	0	0	0	1	0	0	1	1
DD	Fish	2004		Bythaelurus clevai	0	0	0	0	0	0	0	0	0	0	0	0	0	0	0	0	0	0	0	0
DD	Fish	2003		Bythaelurus dawsoni	1	0	0	0	0	0	0	0	0	0	0	1	0	0	0	0	0	0	0	0
DD	Fish	2004		Bythaelurus hispidus	1	0	0	0	0	0	0	0	0	0	0	0	0	0	0	0	0	0	1	0
DD	Fish	2004		Bythaelurus immaculatus	1	0	0	0	0	0	0	0	0	0	0	0	0	0	0	0	0	0	1	0
DD	Fish	2004		Bythaelurus lutarius	0	0	0	0	0	0	0	0	0	0	0	0	0	0	0	0	0	0	0	0
DD	Fish	2010		Cabillus macrophthalmus	1	0	0	0	0	0	0	0	0	0	0	0	0	0	0	0	0	0	1	0
DD	Fish	2010		Callechelys cliffi	0	0	0	0	0	0	0	0	0	0	0	0	0	0	0	0	0	0	0	0
DD	Fish	2010		Callechelys galapagensis	0	0	0	0	0	0	0	0	0	0	0	0	0	0	0	0	0	0	0	0
DD	Fish	2010		Callionymus leucobranchialis	0	0	0	0	0	0	0	0	0	0	0	0	0	0	0	0	0	0	0	0
DD	Fish	2010		Callionymus macclesfieldensis	0	0	0	0	0	0	0	0	0	0	0	0	0	0	0	0	0	0	0	0
DD	Fish	2010		Callionymus platycephalus	0	0	0	0	0	0	0	0	0	0	0	0	0	0	0	0	0	0	0	0
DD	Fish	2010		Callionymus whiteheadi	0	0	0	0	0	0	0	0	0	0	0	0	0	0	0	0	0	0	0	0
DD	Fish	2010		Callopanchax toddi	0	0	0	0	0	0	0	0	0	0	0	0	0	0	0	0	0	0	0	0
DD	Fish	2010		Campylomormyrus cassaicus	5	0	0	1	0	1	0	2	0	0	0	0	1	0	0	0	0	0	0	0
DD	Fish	2010		Campylomormyrus luapulaensis	0	0	0	0	0	0	0	0	0	0	0	0	0	0	0	0	0	0	0	0
DD	Fish	2010		Campylomormyrus orycteropus	0	0	0	0	0	0	0	0	0	0	0	0	0	0	0	0	0	0	0	0
DD	Fish	2009		Capoetobrama kuschakewitschi	0	0	0	0	0	0	0	0	0	0	0	0	0	0	0	0	0	0	0	0
DD	Fish	2010		Carapus dubius	4	1	0	0	1	1	0	1	0	0	0	0	0	0	0	0	0	0	0	0
DD	Fish	2009		Carcharhinus altimus	4	1	0	0	0	0	0	0	0	0	0	1	0	0	0	0	2	0	0	0
DD	Fish	2000		Carcharhinus amboinensis	10	0	0	0	0	0	0	0	0	0	1	1	0	0	0	0	4	3	1	0
DD	Fish	2003		Carcharhinus cautus	6	0	0	0	0	0	0	1	0	2	0	0	0	0	0	1	0	0	2	0
DD	Fish	2006		Carcharhinus porosus	7	0	0	1	1	0	0	0	1	0	0	1	0	0	1	0	0	0	2	0
DD	Fish	2010		Careproctus cactiformis	0	0	0	0	0	0	0	0	0	0	0	0	0	0	0	0	0	0	0	0
DD	Fish	2010		Careproctus herwigi	0	0	0	0	0	0	0	0	0	0	0	0	0	0	0	0	0	0	0	0
DD	Fish	2010		Careproctus mederi	0	0	0	0	0	0	0	0	0	0	0	0	0	0	0	0	0	0	0	0
DD	Fish	2010		Careproctus pallidus	1	0	0	0	0	0	0	0	0	0	1	0	0	0	0	0	0	0	0	0
DD	Fish	2010		Cathorops fuerthii	4	0	0	0	0	0	0	1	1	0	0	0	1	0	1	0	0	0	0	0
DD	Fish	2010		Cathorops steindachneri	1	0	0	0	0	0	0	0	0	0	0	0	0	0	1	0	0	0	0	0
DD	Fish	2010		Cathorops taylori	1	0	0	0	0	0	0	0	0	0	0	0	0	0	1	0	0	0	0	0
DD	Fish	2010		Cathorops tuyra	0	0	0	0	0	0	0	0	0	0	0	0	0	0	0	0	0	0	0	0
DD	Fish	2010	2015	Caulolatilus cyanops	0	0	0	0	0	0	0	0	0	0	0	0	0	0	0	0	0	0	0	0
DD	Fish	2010		Caulolatilus dooleyi	0	0	0	0	0	0	0	0	0	0	0	0	0	0	0	0	0	0	0	0
DD	Fish	2010		Caulolatilus williamsi	0	0	0	0	0	0	0	0	0	0	0	0	0	0	0	0	0	0	0	0
DD	Fish	2009		Centrophorus atromarginatus	0	0	0	0	0	0	0	0	0	0	0	0	0	0	0	0	0	0	0	0
DD	Fish	2004		Centrophorus isodon	1	0	0	0	0	0	0	0	0	0	0	0	0	0	0	0	1	0	0	0
DD	Fish	2003		Centrophorus moluccensis	2	0	0	0	0	0	0	0	0	0	0	0	0	1	0	0	0	0	0	1
DD	Fish	2006		Centrophorus tessellatus	0	0	0	0	0	0	0	0	0	0	0	0	0	0	0	0	0	0	0	0
DD	Fish	2003		Centrophorus uyato	3	0	0	0	0	1	0	0	0	0	1	0	0	0	0	0	1	0	0	0
DD	Fish	2010		Centropogon latifrons	0	0	0	0	0	0	0	0	0	0	0	0	0	0	0	0	0	0	0	0
DD	Fish	2009		Centroscyllium excelsum	0	0	0	0	0	0	0	0	0	0	0	0	0	0	0	0	0	0	0	0
DD	Fish	2004		Centroscyllium granulatum	1	0	0	0	0	0	0	0	0	0	0	0	0	1	0	0	0	0	0	0
DD	Fish	2003		Centroscyllium kamoharai	0	0	0	0	0	0	0	0	0	0	0	0	0	0	0	0	0	0	0	0
DD	Fish	2004		Centroscyllium nigrum	3	0	0	0	0	0	0	0	0	0	0	0	0	0	0	1	1	0	0	1
DD	Fish	2009		Centroscyllium ornatum	0	0	0	0	0	0	0	0	0	0	0	0	0	0	0	0	0	0	0	0
DD	Fish	2009		Centroscyllium ritteri	0	0	0	0	0	0	0	0	0	0	0	0	0	0	0	0	0	0	0	0
DD	Fish	2010		Cephalocassis jatia	0	0	0	0	0	0	0	0	0	0	0	0	0	0	0	0	0	0	0	0
DD	Fish	2008		Cephalopholis aitha	0	0	0	0	0	0	0	0	0	0	0	0	0	0	0	0	0	0	0	0
DD	Fish	2008		Cephalopholis aurantia	3	0	0	0	0	0	0	0	0	0	0	0	0	1	1	0	0	0	0	1
DD	Fish	2008		Cephalopholis igarashiensis	0	0	0	0	0	0	0	0	0	0	0	0	0	0	0	0	0	0	0	0
DD	Fish	2008		Cephalopholis nigripinnis	0	0	0	0	0	0	0	0	0	0	0	0	0	0	0	0	0	0	0	0
DD	Fish	2008		Cephalopholis taeniops	9	0	1	0	0	0	0	1	1	0	0	0	2	1	0	0	3	0	0	0
DD	Fish	2009		Cephaloscyllium silasi	0	0	0	0	0	0	0	0	0	0	0	0	0	0	0	0	0	0	0	0
DD	Fish	2009		Cephaloscyllium umbratile	2	0	0	0	0	0	0	0	1	0	0	0	0	1	0	0	0	0	0	0
DD	Fish	2009		Cephalurus cephalus	2	0	0	0	0	1	0	0	0	0	0	0	0	0	0	0	0	1	0	0
DD	Fish	2010		Cerdale ionthas	0	0	0	0	0	0	0	0	0	0	0	0	0	0	0	0	0	0	0	0
DD	Fish	2010		Cerdale paludicola	0	0	0	0	0	0	0	0	0	0	0	0	0	0	0	0	0	0	0	0
DD	Fish	2010		Cerdale prolata	0	0	0	0	0	0	0	0	0	0	0	0	0	0	0	0	0	0	0	0
DD	Fish	2010		Chaenopsis coheni	0	0	0	0	0	0	0	0	0	0	0	0	0	0	0	0	0	0	0	0
DD	Fish	2010		Chaenopsis deltarrhis	0	0	0	0	0	0	0	0	0	0	0	0	0	0	0	0	0	0	0	0
DD	Fish	2010		Chaetodon bennetti	2	0	0	0	0	0	0	0	0	0	0	0	0	0	1	0	0	0	1	0
DD	Fish	2010		Chaetodon ocellicaudus	0	0	0	0	0	0	0	0	0	0	0	0	0	0	0	0	0	0	0	0
DD	Fish	2010		Chaetodon reticulatus	1	0	0	0	0	0	0	0	0	1	0	0	0	0	0	0	0	0	0	0
DD	Fish	2010		Chaetodontoplus caeruleopunctatus	0	0	0	0	0	0	0	0	0	0	0	0	0	0	0	0	0	0	0	0
DD	Fish	2010		Channa barca	2	0	0	0	0	0	0	0	0	0	0	0	0	0	0	1	0	1	0	0
DD	Fish	2010		Channallabes longicaudatus	0	0	0	0	0	0	0	0	0	0	0	0	0	0	0	0	0	0	0	0
DD	Fish	2010		Chascanopsetta crumenalis	0	0	0	0	0	0	0	0	0	0	0	0	0	0	0	0	0	0	0	0
DD	Fish	2010		Cheilotrema saturnum	1	0	0	0	0	0	0	0	0	0	0	0	0	1	0	0	0	0	0	0
DD	Fish	2010		Chetia welwitschi	0	0	0	0	0	0	0	0	0	0	0	0	0	0	0	0	0	0	0	0
DD	Fish	2010		Chiloglanis angolensis	0	0	0	0	0	0	0	0	0	0	0	0	0	0	0	0	0	0	0	0
DD	Fish	2010		Chiloglanis lamottei	0	0	0	0	0	0	0	0	0	0	0	0	0	0	0	0	0	0	0	0
DD	Fish	2010		Chiloglanis lufirae	0	0	0	0	0	0	0	0	0	0	0	0	0	0	0	0	0	0	0	0
DD	Fish	2010		Chiloglanis marlieri	0	0	0	0	0	0	0	0	0	0	0	0	0	0	0	0	0	0	0	0
DD	Fish	2010		Chiloglanis modjensis	0	0	0	0	0	0	0	0	0	0	0	0	0	0	0	0	0	0	0	0
DD	Fish	2010		Chiloglanis neumanni	4	1	0	0	0	0	0	0	0	0	0	0	0	2	0	0	0	1	0	0
DD	Fish	2010		Chiloglanis niger	0	0	0	0	0	0	0	0	0	0	0	0	0	0	0	0	0	0	0	0
DD	Fish	2010		Chiloglanis niloticus	0	0	0	0	0	0	0	0	0	0	0	0	0	0	0	0	0	0	0	0
DD	Fish	2010		Chiloglanis reticulatus	0	0	0	0	0	0	0	0	0	0	0	0	0	0	0	0	0	0	0	0
DD	Fish	2009		Chiloscyllium burmensis	0	0	0	0	0	0	0	0	0	0	0	0	0	0	0	0	0	0	0	0
DD	Fish	2006		Chimaera cubana	1	0	0	0	0	0	0	0	0	0	0	0	0	0	0	1	0	0	0	0
DD	Fish	2006		Chimaera jordani	0	0	0	0	0	0	0	0	0	0	0	0	0	0	0	0	0	0	0	0
DD	Fish	2006		Chimaera owstoni	0	0	0	0	0	0	0	0	0	0	0	0	0	0	0	0	0	0	0	0
DD	Fish	2006		Chimaera phantasma	5	0	0	0	0	0	0	1	1	1	0	1	0	0	1	0	0	0	0	0
DD	Fish	2010		Chirolophis snyderi	0	0	0	0	0	0	0	0	0	0	0	0	0	0	0	0	0	0	0	0
DD	Fish	2010		Chlopsis kazuko	0	0	0	0	0	0	0	0	0	0	0	0	0	0	0	0	0	0	0	0
DD	Fish	2006		Choerodon azurio	0	0	0	0	0	0	0	0	0	0	0	0	0	0	0	0	0	0	0	0
DD	Fish	2010		Choerodon gymnogenys	0	0	0	0	0	0	0	0	0	0	0	0	0	0	0	0	0	0	0	0
DD	Fish	2010		Choerodon paynei	0	0	0	0	0	0	0	0	0	0	0	0	0	0	0	0	0	0	0	0
DD	Fish	2006	2014	Chondrostoma holmwoodii	2	0	0	0	0	0	0	0	0	0	0	0	0	0	0	1	1	0	0	0
DD	Fish	2010		Chriolepis cuneata	0	0	0	0	0	0	0	0	0	0	0	0	0	0	0	0	0	0	0	0
DD	Fish	2010		Chriolepis minutillus	0	0	0	0	0	0	0	0	0	0	0	0	0	0	0	0	0	0	0	0
DD	Fish	2010		Chriolepis tagus	0	0	0	0	0	0	0	0	0	0	0	0	0	0	0	0	0	0	0	0
DD	Fish	2010		Chromis flavicauda	0	0	0	0	0	0	0	0	0	0	0	0	0	0	0	0	0	0	0	0
DD	Fish	2007		Chrysichthys furcatus	3	0	0	0	0	0	0	0	0	0	0	0	0	1	1	1	0	0	0	0
DD	Fish	2007		Chrysichthys hildae	0	0	0	0	0	0	0	0	0	0	0	0	0	0	0	0	0	0	0	0
DD	Fish	2010		Chrysichthys levequei	0	0	0	0	0	0	0	0	0	0	0	0	0	0	0	0	0	0	0	0
DD	Fish	2010		Chrysichthys macropterus	0	0	0	0	0	0	0	0	0	0	0	0	0	0	0	0	0	0	0	0
DD	Fish	2010		Chrysichthys uniformis	0	0	0	0	0	0	0	0	0	0	0	0	0	0	0	0	0	0	0	0
DD	Fish	2010		Cilus gilberti	9	0	0	0	1	0	3	1	0	1	1	0	1	0	0	0	0	0	1	0
DD	Fish	2006		Cirrhigaleus asper	1	0	0	0	0	0	0	0	0	0	0	1	0	0	0	0	0	0	0	0
DD	Fish	2009		Cirrhigaleus barbifer	1	0	0	0	0	0	0	0	0	0	0	0	1	0	0	0	0	0	0	0
DD	Fish	2010		Cirrhilabrus balteatus	0	0	0	0	0	0	0	0	0	0	0	0	0	0	0	0	0	0	0	0
DD	Fish	2010		Cirrhilabrus cyanopleura	0	0	0	0	0	0	0	0	0	0	0	0	0	0	0	0	0	0	0	0
DD	Fish	2010		Cirrhilabrus exquisitus	0	0	0	0	0	0	0	0	0	0	0	0	0	0	0	0	0	0	0	0
[truncated: 5,092 more rows]
